# Supplementary material for: Modelling COVID-19 transmission in Africa: countrywise projections of total and severe infections under different lockdown scenarios
Source: PubMed Central journal article supplement — BMJ Open. 2021 Mar 8;11(3):e044149. doi: 10.1136/bmjopen-2020-044149 (PMC7941678; doi:10.1136/bmjopen-2020-044149), 2021-03-08
Supplement: bmjopen-2020-044149.draft_revisions.pdf [file bmjopen-2020-044149.draft_revisions.pdf]

# BMJ Open

BMJ Open is committed to open peer review. As part of this commitment we make the peer review history of every article we publish publicly available.

When an article is published we post the peer reviewers' comments and the authors' responses online. We also post the versions of the paper that were used during peer review. These are the versions that the peer review comments apply to.

The versions of the paper that follow are the versions that were submitted during the peer review process. They are not the versions of record or the final published versions. They should not be cited or distributed as the published version of this manuscript.

BMJ Open is an open access journal and the full, final, typeset and author-corrected version of record of the manuscript is available on our site with no access controls, subscription charges or pay-per-view fees (<http://bmjopen.bmj.com>).

If you have any questions on BMJ Open's open peer review process please email [info.bmjopen@bmj.com](mailto:info.bmjopen@bmj.com)

# BMJ Open

## Modeling COVID-19 Transmission in Africa: Country-wise Projections of Total and Severe Infections Under Different Lockdown Scenarios

|                               |                                                                                                                                                                                                                                                                                                                                                                                                                                                                                                                                                                                                                                                                                                                                                                                                                                                            |
|-------------------------------|------------------------------------------------------------------------------------------------------------------------------------------------------------------------------------------------------------------------------------------------------------------------------------------------------------------------------------------------------------------------------------------------------------------------------------------------------------------------------------------------------------------------------------------------------------------------------------------------------------------------------------------------------------------------------------------------------------------------------------------------------------------------------------------------------------------------------------------------------------|
| Journal:                      | <i>BMJ Open</i>                                                                                                                                                                                                                                                                                                                                                                                                                                                                                                                                                                                                                                                                                                                                                                                                                                            |
| Manuscript ID                 | bmjopen-2020-044149                                                                                                                                                                                                                                                                                                                                                                                                                                                                                                                                                                                                                                                                                                                                                                                                                                        |
| Article Type:                 | Original research                                                                                                                                                                                                                                                                                                                                                                                                                                                                                                                                                                                                                                                                                                                                                                                                                                          |
| Date Submitted by the Author: | 24-Aug-2020                                                                                                                                                                                                                                                                                                                                                                                                                                                                                                                                                                                                                                                                                                                                                                                                                                                |
| Complete List of Authors:     | Frost, Isabel; Center for Disease Dynamics Economics and Policy, ; Imperial College Faculty of Medicine - Hammersmith Campus, Craig, Jessica; Center for Disease Dynamics Economics and Policy Osen, Gilbert; Center for Disease Dynamics Economics and Policy Hauck, Stephanie; Center for Disease Dynamics Economics and Policy Kalanxhi, Erta; Center for Disease Dynamics Economics and Policy Schueller, Emily; Center for Disease Dynamics Economics and Policy Gatalo, Oliver; Center for Disease Dynamics Economics and Policy Yang, Yupeng; Center for Disease Dynamics Economics and Policy Tseng, Katie; Center for Disease Dynamics Economics and Policy, Lin, Gary; Johns Hopkins University, Department of Emergency Medicine, School of Medicine<br>Klein, Eili; Johns Hopkins University; Center for Disease Dynamics Economics and Policy |
| Keywords:                     | Epidemiology < TROPICAL MEDICINE, Public health < INFECTIOUS DISEASES, Respiratory infections < THORACIC MEDICINE                                                                                                                                                                                                                                                                                                                                                                                                                                                                                                                                                                                                                                                                                                                                          |
|                               |                                                                                                                                                                                                                                                                                                                                                                                                                                                                                                                                                                                                                                                                                                                                                                                                                                                            |

SCHOLARONE™  
Manuscripts

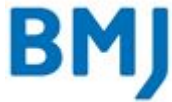

I, the Submitting Author has the right to grant and does grant on behalf of all authors of the Work (as defined in the below author licence), an exclusive licence and/or a non-exclusive licence for contributions from authors who are: i) UK Crown employees; ii) where BMJ has agreed a CC-BY licence shall apply, and/or iii) in accordance with the terms applicable for US Federal Government officers or employees acting as part of their official duties; on a worldwide, perpetual, irrevocable, royalty-free basis to BMJ Publishing Group Ltd ("BMJ") its licensees and where the relevant Journal is co-owned by BMJ to the co-owners of the Journal, to publish the Work in this journal and any other BMJ products and to exploit all rights, as set out in our [licence](#).

The Submitting Author accepts and understands that any supply made under these terms is made by BMJ to the Submitting Author unless you are acting as an employee on behalf of your employer or a postgraduate student of an affiliated institution which is paying any applicable article publishing charge ("APC") for Open Access articles. Where the Submitting Author wishes to make the Work available on an Open Access basis (and intends to pay the relevant APC), the terms of reuse of such Open Access shall be governed by a Creative Commons licence – details of these licences and which [Creative Commons](#) licence will apply to this Work are set out in our licence referred to above.

Other than as permitted in any relevant BMJ Author's Self Archiving Policies, I confirm this Work has not been accepted for publication elsewhere, is not being considered for publication elsewhere and does not duplicate material already published. I confirm all authors consent to publication of this Work and authorise the granting of this licence.

## Modeling COVID-19 Transmission in Africa: Country-wise Projections of Total and Severe Infections Under Different Lockdown Scenarios

Isabel Frost, DPhil<sup>1,2,3</sup>, Jessica Craig, MPH<sup>1</sup>, Gilbert Osen, MSc<sup>1</sup>, Stephanie Hauck, PhD<sup>1</sup>, Erta Kalanxhi, PhD<sup>1</sup>, Emily Schueller, MA<sup>1</sup>, Oliver Gatalo, MPH<sup>1</sup>, Yupeng Yang, MS<sup>1</sup>, Katie Tseng, MPH<sup>1</sup>, Gary Lin, PhD<sup>4</sup>, Eili Klein, PhD<sup>1,4</sup>

1. Center for Disease Dynamics Economics & Policy, Inc (CDDEP), Silver Spring, MD, USA
2. Imperial College London, London, UK
3. Amity University, Noida, India
4. Department of Emergency Medicine, School of Medicine, Johns Hopkins University, Baltimore, MD, USA

**Corresponding author:** Isabel Frost, [frost.isabel@gmail.com](mailto:frost.isabel@gmail.com), Center for Disease Dynamics Economics & Policy, Inc (CDDEP), Silver Spring, MD, USA

**Word count: 3864 words**

## ABSTRACT

### *Objectives*

As of August 24<sup>th</sup> 2020, there have been 1,084,904 confirmed cases of SARS-CoV-2 and 24,683 deaths across the African continent. Despite relatively lower numbers of cases initially, many African countries are now experiencing an exponential increase in case numbers. Estimates of the progression of disease and potential impact of different interventions are needed to inform policy making decisions. Herein, we model the possible trajectory of SARS-CoV-2 in 52 African countries under different intervention scenarios.

### *Design*

We developed a compartmental model of SARS-CoV-2 transmission to estimate the COVID-19 case burden for all African countries while considering four scenarios: no intervention, moderate lockdown, hard lockdown, and hard lockdown with continued restrictions once lockdown is lifted. We further analyzed the potential impact of COVID-19 on vulnerable populations affected by HIV/AIDS and TB.

### *Results*

In the absence of an intervention, the most populous countries had the highest peaks in active projected number of infections with Nigeria having an estimated 645,081 severe infections. The scenario with a hard lockdown and continued post-lockdown interventions to reduce transmission was the most efficacious strategy for delaying the time to the peak and reducing the number of cases. In South Africa projected peak severe infections increase from 162,977 to 203,261, when vulnerable populations with HIV/AIDS and TB are included in the analysis.

### *Conclusion*

The COVID-19 pandemic is rapidly spreading across the African continent. Estimates of the potential impact of interventions and burden of disease are essential for policy makers to make evidence-based decisions on the distribution of limited resources and to balance the economic costs of interventions with the potential for saving lives.

## ARTICLE SUMMARY

### *Strengths and limitations of this study*

- Though the rapid spread of SARS-CoV-2 through China, Europe and the United States has been well-studied, leading to a detailed understanding of its biology and epidemiology, the population and resources for combatting the spread of the disease in Africa greatly differ to those areas and require models specific to this context.
- Few models that provide estimates for policymakers, donors, and aid organizations focused on Africa to plan an effective response to the pandemic threat that optimizes the use of limited resources.
- This is a compartmental model and as such has inherent weaknesses; including the possible overestimation of the number of infections as it is assumed people are well mixed, despite many social, physical and geographical barriers to mixing within countries.
- Peaks in transmission are likely to occur at different times in different regions, with multiple epicenters.
- This model is not stochastic and case data are modeled from the first twenty or more cases, each behaving as an average case; in reality, there are no average cases; some individuals are likely to have many contacts, causing multiple infections, and others to have very few.

### **FUNDING**

This work was supported by Centers for Disease Control and Prevention Modeling in Infectious Disease (MInD) in Healthcare Network (Grant Number 1U01CK000536).

### **COMPETING INTERESTS**

The authors have no competing interests to declare.

## INTRODUCTION

On March 11, 2020, the World Health Organization declared the novel severe acute respiratory syndrome coronavirus 2 (SARS-CoV-2) outbreak a pandemic. As of 24<sup>th</sup> August 2020, there have been over 23,472,067 cumulative confirmed cases of coronavirus disease (COVID-19) and over 809,747 deaths reported globally.[1] The first confirmed COVID-19 case in Africa occurred in Egypt on February 14, 2020. To-date, African countries have reported lower disease incidence than most other countries, with 1,084,904 confirmed cases and 24,683 deaths as of 24<sup>th</sup> August 2020 across the continent. However, infectious disease surveillance and reporting infrastructure remain highly underdeveloped, and COVID-19 testing is limited given the shortage of human resources and appropriate laboratory and surveillance facilities across the continent.[2]

Although uncertainties underlying SARS-CoV-2 disease transmission and severity persist, ongoing analysis of available data suggests that old age and underlying health conditions play a critical role in the severity of disease prognosis.[3,4] Approximately 75% of the African population is less than 35 years of age, and African countries may benefit from a largely young population.[5] However, these populations may also be at particular risk for high morbidity and mortality from COVID-19 given the high prevalence of immunocompromised individuals. In 2016, 417,000 people died from tuberculosis in the African region, where 25% of the world's TB deaths occur.[6] Other prevalent co-morbidities include HIV, for which many patients are receiving anti-retroviral therapy, and malnutrition, in addition to other communicable and non-communicable diseases.[7–9]

To mitigate the spread of COVID-19, the majority of African countries reduced or banned international travel and instituted curfews, lockdowns, and other social distancing interventions beginning in March and April 2020.[10] Several studies have demonstrated the effectiveness of social distancing and other quarantine measures in tandem with a rapid scale up of SARS-CoV-2 testing.[11] By one estimate, the number of people likely to be infected with the virus after encountering an infected individual declined by 55 percent after one week of shutdown in Wuhan, China.[12] However, as the majority of these restrictions were lifted in June 2020, the transmission rate is expected to increase, especially in highly populated areas where social distancing is not feasible.

In this analysis, we combine best available estimates of the parameters that govern SARS-CoV-2 transmission dynamics with country-specific population data to estimate potential COVID-19 case burdens under four scenarios: baseline (assuming disease transmission is not mitigated by appropriate interventions), moderate lockdown, hard lockdown, and hard lockdown with continued social distancing. Given the current lack of data and understanding of how COVID-19 will impact the continent, these estimates are generated to inform national and continental COVID-19 preparation and response efforts on the basis of how this disease has spread elsewhere.

## METHODS

### Data

The number of confirmed COVID-19 cases and the date of the first twenty or more cases were obtained for each country using data aggregated by the Johns Hopkins Centers for Systems Science and Engineering as of 25<sup>th</sup> June 2020.[1] Lockdown start and end dates, where applicable, were compiled from a variety of sources including news media reports and government statements (Appendix 1 and Table 2). Although data are as current as possible, many government policies are under continuous review and lockdown dates may become rapidly outdated. Where countries do not have dates for the lifting of lockdown, a duration of 60 days has been assumed in line with the recommendations of many governments. Country population estimates were obtained from the World Bank.[13] Projections were simulated across all African nations and territories (excluding Comoros, Mayote, Reunion, Lesotho, and St. Helena which were omitted for lack of sufficient case data).

For all included countries, we used case data for 200 days after the first 20 or more confirmed cases were recorded. Only the Seychelles has not yet reached this 20-case threshold, where confirmed cases remain at 11 since April 6, 2020. For this case the highest number and the date this figure was first recorded were used to initiate the model. Model start and end dates for each country are provided in Table 2.

Table 2: Lockdown and Peak Dates

| Country                  | Beginning Date of Simulation | Start Date of Lockdown | Duration of Lockdown (Days) | Date of Peak Infections (Baseline) | Date of Peak Infections (Moderate Lockdown) | Date of Peak Infections (Hard Lockdown) | Date of Peak Infections (Hard Lockdown with Social Distancing) |
|--------------------------|------------------------------|------------------------|-----------------------------|------------------------------------|---------------------------------------------|-----------------------------------------|----------------------------------------------------------------|
| Algeria                  | 3/9/20                       | 3/23/20                | 82                          | 7/2/20                             | 7/22/20                                     | 8/27/20                                 | 8/14/20                                                        |
| Angola                   | 4/18/20                      | 3/31/20                | 70                          | 8/6/20                             | 8/29/20                                     | 9/12/20                                 | 10/3/20                                                        |
| Benin                    | 4/5/20                       | 3/30/20                | 41                          | 7/15/20                            | 7/31/20                                     | 8/15/20                                 | 9/23/20                                                        |
| Botswana                 | 4/19/20                      | 4/6/20                 | 46                          | 7/16/20                            | 8/18/20                                     | 8/22/20                                 | 9/5/20                                                         |
| Burkina Faso             | 3/18/20                      | 3/21/20                | 54                          | 7/1/20                             | 7/23/20                                     | 7/25/20                                 | 8/6/20                                                         |
| Burundi                  | 5/17/20                      | 3/21/20                | 39                          | 9/3/20                             | 9/11/20                                     | 9/23/20                                 | 10/9/20                                                        |
| Cabo Verde               | 4/15/20                      | 3/28/20                | 17                          | 7/6/20                             | 7/16/20                                     | 7/29/20                                 | 8/3/20                                                         |
| Cameroon                 | 3/20/20                      | 3/18/20                | 44                          | 7/6/20                             | 7/21/20                                     | 8/11/20                                 | 8/29/20                                                        |
| Central African Republic | 4/28/20                      | 3/30/20                | 60                          | 8/9/20                             | 8/31/20                                     | 9/7/20                                  | 9/29/20                                                        |
| Chad                     | 4/13/20                      | 4/2/20                 | 43                          | 7/28/20                            | 8/3/20                                      | 9/6/20                                  | 9/26/20                                                        |
| Congo (Brazzaville)      | 4/2/20                       | 3/31/20                | 61                          | 7/12/20                            | 7/28/20                                     | 8/27/20                                 | 8/26/20                                                        |
| Congo (Kinshasa)         | 3/21/20                      | 3/18/20                | 78                          | 7/9/20                             | 8/11/20                                     | 8/30/20                                 | 9/9/20                                                         |
| Cote d'Ivoire            | 3/23/20                      | 3/16/20                | 62                          | 7/3/20                             | 7/20/20                                     | 8/16/20                                 | 8/29/20                                                        |
| Djibouti                 | 3/31/20                      | 3/23/20                | 46                          | 6/22/20                            | 7/20/20                                     | 8/4/20                                  | 8/18/20                                                        |
| Egypt                    | 3/8/20                       | 3/15/20                | 137                         | 6/22/20                            | 7/27/20                                     | 10/2/20                                 | 9/14/20                                                        |



1  
2  
3  
4  
5  
6  
7  
8  
9  
10  
11  
12  
13  
14  
15  
16  
17  
18  
19  
20  
21  
22  
23  
24  
25  
26  
27  
28  
29  
30  
31  
32  
33  
34  
35  
36  
37  
38  
39  
40  
41  
42  
43  
44  
45  
46  
47  
48  
49  
50  
51  
52  
53  
54  
55  
56  
57  
58  
59  
60

|                       |         |         |     |         |         |          |          |
|-----------------------|---------|---------|-----|---------|---------|----------|----------|
| Equatorial Guinea     | 4/12/20 | 3/26/20 | 64  | 7/5/20  | 7/27/20 | 8/13/20  | 8/26/20  |
| Eritrea               | 4/2/20  | 3/23/20 | 31  | 7/4/20  | 7/24/20 | 7/30/20  | 8/18/20  |
| Eswatini              | 4/18/20 | 3/26/20 | 42  | 7/19/20 | 7/28/20 | 8/24/20  | 8/30/20  |
| Ethiopia              | 3/29/20 | 3/22/20 | 170 | 7/22/20 | 8/18/20 | 10/27/20 | 11/22/20 |
| Gabon                 | 4/2/20  | 3/20/20 | 58  | 7/5/20  | 7/19/20 | 8/5/20   | 8/27/20  |
| Gambia                | 5/11/20 | 3/17/20 | 59  | 8/11/20 | 8/29/20 | 9/29/20  | 10/8/20  |
| Ghana                 | 3/22/20 | 3/17/20 | 34  | 7/11/20 | 7/8/20  | 7/25/20  | 8/8/20   |
| Guinea                | 3/30/20 | 3/26/20 | 50  | 7/8/20  | 7/19/20 | 8/15/20  | 8/30/20  |
| Guinea-Bissau         | 4/7/20  | 3/17/20 | 55  | 7/13/20 | 7/31/20 | 8/12/20  | 8/19/20  |
| Kenya                 | 3/24/20 | 3/15/20 | 43  | 7/14/20 | 8/14/20 | 8/27/20  | 9/13/20  |
| Liberia               | 4/8/20  | 3/22/20 | 21  | 7/15/20 | 7/19/20 | 8/9/20   | 8/18/20  |
| Libya                 | 4/7/20  | 4/17/20 | 20  | 7/19/20 | 7/28/20 | 8/6/20   | 8/10/20  |
| Madagascar            | 3/26/20 | 3/23/20 | 60  | 7/6/20  | 8/5/20  | 8/15/20  | 8/23/20  |
| Malawi                | 4/22/20 | 3/23/20 | 48  | 8/7/20  | 8/13/20 | 9/17/20  | 10/21/20 |
| Mali                  | 3/30/20 | 3/15/20 | 55  | 7/24/20 | 8/8/20  | 8/26/20  | 9/4/20   |
| Mauritania            | 5/14/20 | 3/15/20 | 60  | 8/18/20 | 9/9/20  | 10/3/20  | 10/9/20  |
| Mauritius             | 3/22/20 | 3/29/20 | 64  | 6/20/20 | 7/15/20 | 8/1/20   | 8/14/20  |
| Morocco               | 3/15/20 | 3/15/20 | 87  | 6/28/20 | 7/26/20 | 8/25/20  | 8/18/20  |
| Mozambique            | 4/10/20 | 3/23/20 | 68  | 7/20/20 | 8/17/20 | 9/10/20  | 10/9/20  |
| Namibia               | 4/5/20  | 3/17/20 | 76  | 7/8/20  | 8/5/20  | 8/17/20  | 8/18/20  |
| Niger                 | 3/30/20 | 3/20/20 | 113 | 7/14/20 | 8/23/20 | 9/22/20  | 9/16/20  |
| Nigeria               | 3/21/20 | 3/30/20 | 63  | 7/15/20 | 8/4/20  | 9/4/20   | 9/30/20  |
| Rwanda                | 3/23/20 | 3/21/20 | 60  | 7/2/20  | 7/15/20 | 8/19/20  | 9/12/20  |
| Sao Tome and Principe | 5/5/20  | 3/17/20 | 60  | 7/22/20 | 8/13/20 | 9/1/20   | 9/8/20   |
| Senegal               | 3/15/20 | 3/14/20 | 77  | 6/30/20 | 7/17/20 | 8/12/20  | 8/18/20  |
| Seychelles            | 4/6/20  | 3/16/20 | 60  | 6/19/20 | 7/5/20  | 7/21/20  | 8/15/20  |
| Sierra Leone          | 4/17/20 | 4/4/20  | 60  | 7/21/20 | 8/8/20  | 8/28/20  | 9/13/20  |
| Somalia               | 4/10/20 | 3/18/20 | 60  | 7/17/20 | 8/17/20 | 8/24/20  | 9/15/20  |
| South Africa          | 3/13/20 | 3/27/20 | 35  | 6/23/20 | 7/11/20 | 8/11/20  | 8/1/20   |
| South Sudan           | 4/28/20 | 3/25/20 | 60  | 8/9/20  | 9/7/20  | 9/9/20   | 9/21/20  |
| Sudan                 | 4/13/20 | 3/15/20 | 80  | 7/29/20 | 8/22/20 | 9/19/20  | 10/9/20  |
| Tanzania              | 4/1/20  | 3/23/20 | 60  | 7/18/20 | 8/3/20  | 9/3/20   | 9/20/20  |

|          |         |         |    |         |         |         |         |
|----------|---------|---------|----|---------|---------|---------|---------|
| Togo     | 3/24/20 | 3/20/20 | 60 | 7/2/20  | 7/12/20 | 8/30/20 | 8/16/20 |
| Tunisia  | 3/16/20 | 3/12/20 | 53 | 6/20/20 | 7/31/20 | 7/27/20 | 8/12/20 |
| Uganda   | 3/27/20 | 3/18/20 | 47 | 7/10/20 | 7/30/20 | 8/16/20 | 8/27/20 |
| Zambia   | 3/27/20 | 3/17/20 | 38 | 6/30/20 | 7/27/20 | 8/15/20 | 9/3/20  |
| Zimbabwe | 4/15/20 | 3/23/20 | 60 | 7/26/20 | 8/25/20 | 9/8/20  | 9/19/20 |

For peer review only

To incorporate the varying age structures of different countries into the model, parameters were weighted by the proportion of the population in the 0-64, 65-79, and 80 and above age brackets in each country to form a unique set of parameters for each country (Appendix 2). Demographic data were obtained from the World Bank for 2018,[13] with the exception of Eritrea, for which population data came from IndexMundi.[14] Many African countries have high rates of TB and HIV/AIDS which are likely to make their populations more vulnerable to severe infection. To further consider the impact of this on our analysis we reweighted the parameters according to the proportion of the younger population with HIV and/or TB. Those over age 80, and 65-79 were modeled as before, however the under 64 cohort was split into healthy individuals and those affected by TB and/or HIV/AIDS. For this group we employed the parameter set previously used for the 0-64-year-old cohort, with the exception of progression to severe disease, which was doubled to 0.404 (upper bound tripled to 0.606 and lower bound of 0.202), for populations with HIV/AIDS and/or TB, based on estimates for mortality from South Africa.[15,16] Algeria, Mauritius, Eritrea, and Seychelles were excluded from this second analysis due to lack of data.

## Model Structure

### *Epidemiological equations and parameters*

The model follows a modified SEIR structure (Figure 1) with seven unique compartments to describe the epidemiology of SARS-CoV-2. This is adapted from the model structure previously described in Lin *et al.* 2020.[17] Susceptible individuals,  $S$ , are those in the population that can become infected with the virus. They become exposed,  $E$ , to SARS-CoV-2 by encountering infected individuals in the population at rate  $\beta_1$  for asymptomatic individuals or  $\beta_2$  for symptomatic individuals. We assume that individuals that are asymptomatic or mildly symptomatic have a lower transmission rate,  $\beta_1$ , than more symptomatic individuals,  $\beta_2$ . [17] Exposed individuals incubate the virus at rate  $\mu$  (calculated as the inverse of the incubation period). A proportion of these individuals,  $\theta$ , become symptomatically infected while the rest become contagious with mild or no symptoms,  $C$ . Of the symptomatically infected individuals, a proportion,  $h$ , have severe symptoms, to the extent that they will require hospitalization if available,  $I_S$ , and the rest have moderate or non-severe symptoms,  $I_N$ . Asymptomatic or mildly symptomatic, moderately symptomatic, and severely symptomatic individuals recover (or otherwise become non-contagious) at rates  $\gamma_1$ ,  $\gamma_2$ , and  $\gamma_3$ , respectively. It is assumed that recovered individuals are immune from becoming re-infected during the time period of the study. Severely infected individuals may also die,  $D$ , at rate  $\delta$ .

The model is described by the following set of differential equations:

$$N = \sum (S + E + C + I_N + I_H + D + R)$$

$$\dot{S} = -\beta_1 \frac{SC}{N} - \beta_2 \frac{S(I_N + I_S)}{N}$$

$$\dot{E} = \beta_1 \frac{SC}{N} + \beta_2 \frac{S(I_N + I_S)}{N} - \mu E$$

$$\dot{C} = \mu(1 - \theta)E - \gamma_1 C$$

$$\dot{I}_N = \mu\theta(1 - h)E - \gamma_2 I_N$$

$$\dot{I}_S = \mu\theta h E - \gamma_3 I_S - \delta I_S$$

$$\dot{D} = \delta I_S$$

$$\dot{R} = \gamma_1 C + \gamma_2 I_N + \gamma_3 I_S$$

## Estimation of Epidemiological Parameters

Parameters are estimated from the literature and the sources for this are outlined in Table 1 and the supplementary materials.

To assess the uncertainty of the parameter ranges on model estimations, we used Latin Hypercube Sampling (LHS), a stratified sampling technique that efficiently analyzes large numbers of input parameters by treating each parameter as a separate random variable. Stochastic sampling of the parameters with LHS was based on an estimation of parameter ranges obtained from the literature (Table 1). From the parameter sampling, we were able to calculate the 95% confidence interval (CI) for all compartment values over the temporal domain.

## Scenarios and Assumptions

We provide case projections for the following four scenarios:

1. **Baseline:** Disease continues to spread with no curfew, lockdown, social distancing, or other intervention(s) and with no change in transmission rate.
2. **Moderate Lockdown:** Disease transmission is reduced by 25% during the lockdown period, then transmission resumes at 90% of the pre-lockdown value due to sustained changes in behavior.
3. **Hard Lockdown:** Disease transmission falls 44% during the lockdown period, then transmission resumes at 90% of pre-lockdown levels.
4. **Hard Lockdown and Continued Social Distancing/Isolating Cases:** Disease transmission is reduced by 44% during the lockdown period then, through social distancing regulations and isolation of symptomatic individuals, resumes at 75% of pre-lockdown levels.

For each scenario, we estimate the total number of infections that are asymptomatic or mildly symptomatic, moderately symptomatic, and severely symptomatic cases. The rate of severely symptomatic cases is based on the rate of hospitalization in other parts of the world, although access to hospital care is likely to differ greatly between different parts of Africa.[18]

**Table 1.** Parameters estimation from other literature where the means and corresponding credible intervals are shown in the parenthesis

| Parameter  | Definition                                                                           | Value                                      | Calculation                                 | Ref                                        |         |
|------------|--------------------------------------------------------------------------------------|--------------------------------------------|---------------------------------------------|--------------------------------------------|---------|
| $R_0$      | Basic Reproduction Number                                                            | 3.1<br>(1.9 – 6.5)                         |                                             | [19]                                       |         |
| $\theta$   | Symptomatic rate                                                                     | 0.792<br>(0.568-0.815)                     |                                             | [20–22]                                    |         |
| $\beta_2$  | Infection rate for symptomatic transmissions                                         | 0.62<br>(0.38-1.3)                         | $\frac{R_0}{Infectious\ Period_{severe}}$   | [23]                                       |         |
| $\alpha$   | Reduction of infection rate for asymptomatic transmission                            | 0.55<br>(0.46-0.62)                        |                                             | [24]                                       |         |
| $\beta_1$  | Infection rate for asymptomatic transmissions                                        | 0.341<br>(0.175-0.806)                     | $\beta_1 = \alpha\beta_2$                   |                                            |         |
| $\gamma_1$ | Clearance rate for asymptomatic/mild cases                                           | 0.170<br>(0.0526-0.287)                    | $\frac{1}{Infectious\ Period_{Mild}}$       | [20,24]                                    |         |
| $\gamma_2$ | Clearance rate for symptomatic non-severe cases                                      | 0.238<br>(0.143-0.333)                     | $\frac{1}{Infectious\ Period_{sympt}}$      | [25–27]                                    |         |
| $\gamma_3$ | Clearance rate for symptomatic severe cases                                          | 0.238<br>(0.143-0.333)                     | $\frac{1}{Infectious\ Period_{sympt}}$      | [25–27]                                    |         |
| $\mu$      | Incubation rate                                                                      | 0.202<br>(0.101-0.364)                     | $\frac{1}{Incubation\ Time}$                | [28,29]                                    |         |
| $\delta$   | Severe case fatality rate                                                            | 0.244<br>(0.209-0.280)                     |                                             | [16,30]                                    |         |
| $\kappa$   | Increase in rate of progression to severe disease in populations with TB or HIV/AIDS | 2.14<br>(1.1-2.7)                          |                                             | [15,16]                                    |         |
| $h$        | Rate of progression to severe disease <sup>‡</sup>                                   | <i>Ages 0-64</i><br>0.202<br>(0.167-0.237) | <i>Ages 65-79</i><br>0.361<br>(0.286-0.435) | <i>Ages ≥ 80</i><br>0.471<br>(0.308-0.634) | [31,32] |
| $\kappa h$ | Rate of progression to severe disease in populations with TB and/or HIV/AIDS         | 0.432<br>(0.222-0.545)                     |                                             |                                            |         |

<sup>‡</sup> Age groups are: 0-59, 60-69, 70+; 0-64, 65-74, 65+, US hospitalization rate used as a proxy for severe disease progression

## Patient and Public Involvement Statement

It was not appropriate or possible to involve patients or the public in the design, or conduct, or reporting, or dissemination plans of our research.

## RESULTS

Under baseline conditions, the most populous countries stand to bear the greatest disease burden with Nigeria having an estimated peak case load of 645,081 severe infections (0·31 percent of total country population) and 9,359,221 total infections (4·54% of total country population), followed by Ethiopia, with an estimated peak case load of 335,024 (0·29%) severe infections and 4,978,734 (4·33%) total infections (Figure 2; Table 3). Smaller countries have a lower case load; Cabo Verde is projected to have a peak case load of 2,244 severe infections (0·40% of total country population) and 32,811 (5·90%) total infections, Sao Tome and Principe are estimated to experience peaks of 14,012 (6·40%) total infections and 1,048 (0·48%) severe infections (Figure S1). However, the baseline scenario does not reflect the current situation in any country as all countries have instituted some form of social distancing policies.

Moderate lockdowns (assumed to lower transmission by 25% during lockdown), reduced estimated peak severe infections by 10% in Senegal, to 37%, in Ethiopia and Egypt. However, South Africa the peak of the severe case load showed a 1% increase of 1,929, given a moderate lockdown of 35 days (Figures S1 and S6). Longer lockdowns were more effective. In Egypt and Ethiopia, who have the longest planned lockdowns of any of the African countries (137 and 170 days, respectively), the estimated impact was a reduction in total peak cases of 37%, or 130,998 and 123,890 severe cases, respectively (Figure 5). In addition, the estimated peak of infections was shifted by 35 and 27 days, respectively (Table 2). In Cabo Verde, which had the shortest planned lockdown of 17 days, the estimated reduction in severe peak cases was 19% under a moderate lockdown, and the peak date of infections was shifted by 10 days (Figure 5).

The effect of hard temporary lockdowns without extended post-lockdown social distancing compared to moderate lockdowns varied by country. The reduction in severe peak infections ranged from 7%, in Rwanda, to 35% in Egypt, compared to baseline values. In some countries a hard lockdown had a lower impact on reducing peak cases than a moderate one. For example, in Ethiopia the expected impact of a moderate lockdown reduced severe cases by 123,890 cases compared to baseline, while a hard lockdown reduced cases by 100,743. However, hard lockdowns delayed the onset of the peak in infections compared to moderate lockdowns by several weeks. For example, in Tanzania, a moderate lockdown of 60 days delayed the peak in severe infections by 16 days compared to a 47-day delay in the case of a hard lockdown.

For all countries, hard lockdowns with continued post-lockdown interventions were the most effective in delaying and reducing peak infections. Delays to the peak in infections ranged from 22 days in Libya to 123 days in Ethiopia (Table 2). This reflects the different lengths of lockdowns in these countries which lasted 20, and 170 days respectively. Hard lockdowns with continued interventions also led to the greatest reductions in the peak in estimated total infections to the greatest extent in these model projections, from 36% in Ghana and South Africa to 58% in

Namibia. In Kenya this would reduce the peak case load in severe infections by 100,552 cases with a lockdown of 43 days.

Many African countries have young populations, who have been less likely to show severe symptoms in other countries, however, the high prevalence of HIV/AIDS and TB in these populations potentially renders them more vulnerable to COVID-19.[15] The highest proportional burden HIV countries in Africa are Eswatini, Botswana and South Africa and the highest proportional burden tuberculosis countries are Burundi and Central African Republic. Assuming individuals with TB and HIV/AIDS, once infected, are more likely to progress to severe disease increased the peak number of infections significantly (Figure 2). In Eswatini, Botswana, and South Africa the baseline peak number of severe infections increased from 4,529 to 5,279, 9,334 to 10,023, and from 162,977 to 203,261, respectively (Figure S2, S11-S18). In Burundi, the peak number of severe cases increased from 40,417 to 44,058. However, progression to severe disease may, under certain circumstances, lead to less infections, as those with severe disease may be more likely to die, quarantine, or be sick enough that they are not widely transmitting the disease. For example, in Nigeria, severe infections decrease from 645,081 to 591,888 under this scenario.

## Conclusion

Most African countries are likely early in the outbreak of SARS-CoV-2, and the initial peak in infections may be several months away in many cases. Policymakers need mathematical models that are attuned to the context in Africa to aid in planning for continued transmission of the virus and to develop interventions that reduce disease transmission. Here we analyzed a model of transmission of SARS-CoV-2 parameterized for low-resource settings. Based on current observed cases of COVID-19 in African countries, we assessed the impact of strict social distancing measures. However, the extent and efficacy of lockdown policies is certain to vary between and within countries. Furthermore, after a lockdown, and in response to a high death toll, citizens are likely to continue to adjust their social behavior.[33] The results from our simulations suggest that national lockdowns will likely slow viral transmission, reducing the peak number of active cases and delaying the time until the peak occurs. This delay can allow governments time to prepare by setting up designated COVID-19 treatment sections in hospitals and additional testing centers in densely populated areas, as well as practical measures within communities such as handwashing stations and soap distribution and information campaigns educating the public in infection prevention behaviors including mask wearing, social distancing and handwashing. Our models suggest that by using this time to prepare, transmission is likely to decrease enough to substantially to reduce the peak in infections, even after lockdowns cease. This may make the consequences of the pandemic more manageable for health and social systems, though many are still likely to become overwhelmed.

The predicted dates of peak cases varied greatly by country, from 1<sup>st</sup> August in South Africa to 22<sup>nd</sup> December in Ethiopia in the case of a hard lockdown with continued social distancing (Scenario 3) (Table 6). This is due to many factors including differences in population size, when the virus first arrived in the country, and length and severity of lockdown interventions. Most infections are mild; however, some countries are likely to bear a much higher per capita burden than others, largely due to differences in the duration and efficacy of lockdowns.

1  
2  
3 This model considers the impact of lockdown on transmission of SARS-CoV-2; however,  
4 effective implementation of large-scale mitigation measures thus far implemented in developed  
5 countries may not be feasible or sustainable in many low- and middle-income countries (LMICs)  
6 in Africa and around the world given various sociocultural, economic, and political  
7 challenges.[34,35] Across the African continent, an estimated 40% of people live below the  
8 international poverty line making less than \$1·90 (in 2011 purchasing parity power) per day, and  
9 approximately 85·8% of employment is informal.[36,37] Therefore, lockdowns that restrict  
10 movement to and from work will likely not be well enforced. Furthermore, access to hygiene and  
11 sanitation facilities is limited; in 2017, only 15% of people across sub-Saharan Africa had access  
12 to basic handwashing facilities with soap and water. [38] Social distancing within communities  
13 and within households is often not possible given over 55% of Africa's urban populations live in  
14 densely populated slums, higher than the global average of 30%.[39] In addition, there are 6·3  
15 million refugees and 17·7 million internally displaced persons in the African continent, and  
16 ongoing humanitarian crises have displaced over 20 million people. These challenges will also  
17 abrogate the effectiveness of restrictions on movement and access to care.[40]  
18  
19  
20

21  
22 COVID-19 presents most severely in the elderly population and those with chronic non-  
23 communicable diseases such as diabetes and hypertension, which affects an estimated 55% of  
24 Africans.[41] African populations may benefit from having a younger population and low  
25 prevalence of diabetes (3·9%) compared to the global average (9·3%).[42,43] In the model, we  
26 modify the transmission and mortality rates according to the age structure of countries, based on  
27 evidence that morbidity and mortality is concentrated in older individuals. However emerging  
28 reports of COVID-19 cases in the developing world, particularly Brazil, suggest the death toll in  
29 the young may be higher than expected.[44] Young populations who go out to work, buy food  
30 and look after the family are hard to shield and likely to be highly exposed to the virus. The  
31 average size of households with older members is 12·1 in Senegal and 12·6 in the Gambia, the  
32 highest in the world,[45] and this may increase the potential for exposure to the virus and hinder  
33 isolation of symptomatic cases. High rates of tuberculosis, HIV, malaria, and other infectious  
34 diseases may also make young African populations more vulnerable to severe infection with  
35 COVID-19. In West and Central Africa 60% of people living with HIV do not receive treatment.  
36 [46] The high prevalence of malnutrition, anemia, and exposure to indoor air pollution, often  
37 from cooking fires, may also increase vulnerability. Additionally, the poor air quality in many  
38 Africa cities, which has been shown to be associated with increased morbidity and mortality  
39 from COVID-19,[47,48] may exacerbate issues for the region.[49]  
40  
41  
42

43  
44 Testing capacity is limited in much of Africa,[50] and confirmed cases may increase faster than  
45 predicted in the near future as testing capacity increases and contact tracing continues. In  
46 addition, evidence suggests that many cases are asymptomatic and may be missed by testing  
47 protocols that only include those with symptoms who have recently travelled to an infected area  
48 or their contacts. Furthermore, social stigma and inability to access healthcare may prevent  
49 symptomatic individuals from seeking treatment. This may affect the results of the model as it  
50 uses the initial numbers of confirmed COVID-19 cases recorded. In addition, results from the  
51 model suggest cases may rapidly rise after a hard lockdown if there are no further mitigation  
52 measures. Contact tracing and testing are needed to maintain the reduction in cases gained from  
53 early lockdowns. Pooled testing can make mass testing more affordable and achievable with  
54 limited resources.[51]  
55  
56  
57  
58  
59



1  
2  
3 There are inherent difficulties in inferring real world results from mass action models such as the  
4 one in this study. Our models tend to overestimate the number of infections as they assume  
5 people are well mixed, despite many social, physical and geographical barriers to mixing within  
6 countries. Peaks in transmission are likely to occur at different times in different regions, as has  
7 occurred in the United States and Europe where there have been multiple epicenters. This model  
8 is not stochastic and case data are modeled from the first twenty or more cases, each behaving as  
9 an average case. In reality, there are no average cases; some individuals are likely to have many  
10 contacts, causing multiple infections,[52] and others to have very few. The different contact  
11 patterns of different segments of the population were also not included in this model and may  
12 have an impact on transmission between vulnerable groups.  
13  
14

15  
16 The estimates presented here suggest that the burden of severe disease caused by SARS-CoV-2  
17 is likely to be high for the African continent. Projections of disease progression are needed to  
18 enable policy makers, governments, aid agencies and other actors to optimize resource allocation  
19 and planning decisions. The high prevalence of TB, HIV, and malnutrition and other  
20 immunocompromising conditions accompanied by limited testing capacity and access to  
21 healthcare in many African countries are likely to make populations particularly vulnerable to  
22 this pandemic. Immediate planning and appropriate resource allocation are essential to save lives  
23 and mitigate the impact of COVID-19 in Africa.  
24  
25  
26  
27  
28  
29  
30  
31  
32  
33  
34  
35  
36  
37  
38  
39  
40  
41  
42  
43  
44  
45  
46  
47  
48  
49  
50  
51  
52  
53  
54  
55  
56  
57  
58  
59  
60

## **AUTHOR CONTRIBUTIONS**

IF, JC, GO, KT, OG, ES, E. Kalanxhi and SH contributed to the analysis, data collection and figures. E. Klein, GL and YY developed the model and original code with adaptations and additions by IF. IF, JC, and SH contributed to the writing, and all authors provided critical revisions of the manuscript.

## **ACKNOWLEDGEMENTS**

This work was supported by the Centers for Disease Control and Prevention Modeling in Infectious Disease (MInD) in Healthcare Network.

## **DATA SHARING**

The data for this study is included in the manuscript and supplementary materials, however please contact the corresponding author for any further data.

## REFERENCES

- 1 Dong E, Du H, Gardner L. An interactive web-based dashboard to track COVID-19 in real time. *Lancet Infect Dis* Published Online First: 2020. doi:10.1016/S1473-3099(20)30120-1
- 2 Adebisi YA, Oke GI, Ademola PS, *et al.* SARS-CoV-2 diagnostic testing in Africa: needs and challenges. *Pan Afr Med J* 2020;**35**:3–4. doi:10.11604/pamj.2020.35.4.22703
- 3 Remuzzi A, Remuzzi G. COVID-19 and Italy: what next? *Lancet* 2020;:S0140673620306279. doi:10.1016/S0140-6736(20)30627-9
- 4 Wu Z, McGoogan JM. Characteristics of and Important Lessons From the Coronavirus Disease 2019 (COVID-19) Outbreak in China: Summary of a Report of 72 314 Cases From the Chinese Center for Disease Control and Prevention. *JAMA* Published Online First: February 2020. doi:10.1001/jama.2020.2648
- 5 United Nations Population Division. World Population Prospects 2019. 2019.
- 6 WHO. Tuberculosis Factsheet. <https://www.afro.who.int/health-topics/tuberculosis-tb>
- 7 Ibrahim MK, Zambruni M, Melby CL, *et al.* Impact of Childhood Malnutrition on Host Defense and Infection. *Clin Microbiol Rev* 2017;**30**:919–71. doi:10.1128/CMR.00119-16
- 8 Schaible UE, Kaufmann SHE. Malnutrition and infection: Complex mechanisms and global impacts. *PLoS Med* 2007;**4**:0806–12. doi:10.1371/journal.pmed.0040115
- 9 Taylor A, Vora K, Cao W, *et al.* Protein energy malnutrition decreases immunity and increases susceptibility to influenza infection. *J Immunol* 2011;**186**:67.5 LP-67.5.[http://www.jimmunol.org/content/186/1\\_Supplement/67.5.abstract](http://www.jimmunol.org/content/186/1_Supplement/67.5.abstract)
- 10 World Health Organization [WHO]. Public health and social measures (PHSMs) database. 2020.<https://www.who.int/emergencies/diseases/novel-coronavirus-2019/phsm>
- 11 Nussbaumer-Streit B, Mayr V, Ai D, *et al.* Quarantine alone or in combination with other public health measures to control COVID-19: a rapid review (Review). *Cochrane Database Syst Rev* Published Online First: 2020. doi:10.1002/14651858.CD013574.[www.cochranelibrary.com](http://www.cochranelibrary.com)
- 12 Kucharski AJ, Russell TW, Diamond C, *et al.* Early dynamics of transmission and control of COVID-19: a mathematical modelling study. *Lancet Infect Dis* 2020;**20**:553–8. doi:10.1016/S1473-3099(20)30144-4
- 13 World Bank. World Development Indicators. <http://data.worldbank.org/indicator>
- 14 Index Mundi. [https://www.indexmundi.com/eritrea/demographics\\_profile.html](https://www.indexmundi.com/eritrea/demographics_profile.html)
- 15 Davies M-A. HIV and risk of COVID-19 death: a population cohort study from the Western Cape Province, South Africa. *medRxiv*;:1–21.
- 16 National Institute for Communicable Diseases. Covid-19 Sentinel Hospital Surveillance Update. 2020.
- 17 Lin G, Bhaduri A, Strauss AT, *et al.* Explaining the Bomb-Like Dynamics of COVID-19 with Modeling and the Implications for Policy. *medRxiv* 2020.
- 18 Craig, J, Kalanxhi E, Hauck S. National estimates of critical care capacity in 54 African countries. *medRxiv* 2020.
- 19 Park M, Cook AR, Lim JT, *et al.* A Systematic Review of COVID-19 Epidemiology Based on Current Evidence. *J Clin Med* 2020;**9**:967. doi:10.3390/jcm9040967
- 20 Long QX, Tang XJ, Shi QL, *et al.* Clinical and immunological assessment of asymptomatic SARS-CoV-2 infections. *Nat Med* Published Online First: 2020. doi:10.1038/s41591-020-0965-6

- 1  
2  
3 21 Mizumoto K, Kagaya K, Zarebski A, *et al*. Estimating the asymptomatic proportion of coronavirus  
4 disease 2019 (COVID-19) cases on board the Diamond Princess cruise ship, Yokohama, Japan,  
5 2020. *Eurosurveillance* 2020;**25**:1–5. doi:10.2807/1560-7917.ES.2020.25.10.2000180  
6  
7 22 Lavezzo E, Franchin E, Ciavarella C, *et al*. Suppression of COVID-19 outbreak in the  
8 municipality of Vo, Italy. *medRxiv* 2020;:2020.04.17.20053157.  
9 doi:10.1101/2020.04.17.20053157  
10  
11 23 Kissler SM, Tedijanto C, Goldstein E, *et al*. Projecting the transmission dynamics of SARS-CoV-2  
12 through the postpandemic period. *Science (80- )* 2020;**368**:860–8. doi:10.1126/science.abb5793  
13  
14 24 Li R, Pei S, Chen B, *et al*. Substantial undocumented infection facilitates the rapid dissemination  
15 of novel coronavirus (SARS-CoV-2). *Science (80- )* 2020;**368**:489–93.  
16 doi:10.1126/science.abb3221  
17  
18 25 Prem K, Liu Y, Russell TW, *et al*. The effect of control strategies to reduce social mixing on  
19 outcomes of the COVID-19 epidemic in Wuhan, China: a modelling study. *Lancet Public Heal*  
20 2020;**5**:e261–70. doi:10.1016/S2468-2667(20)30073-6  
21  
22 26 Woelfel R, Corman VM, Guggemos W, *et al*. Virological assessment of hospitalized cases of  
23 coronavirus disease 2019. *medRxiv* 2020;:2020.03.05.20030502.  
24 doi:10.1101/2020.03.05.20030502  
25  
26 27 Banerjee R, Bhattacharjee S, Varadwaj PK. Analyses and Forecast for COVID-19 epidemic in  
27 India. *medRxiv* 2020;:2020.06.26.20141077. doi:10.1101/2020.06.26.20141077  
28  
29 28 Liu T, Hu J, Xiao J, *et al*. Time-varying transmission dynamics of Novel Coronavirus Pneumonia  
30 in China. *Systems Biology* 2020.  
31  
32 29 Lauer SA, Grantz KH, Bi Q, *et al*. The Incubation Period of Coronavirus Disease 2019 (COVID-  
33 19) From Publicly Reported Confirmed Cases: Estimation and Application. *Ann Intern Med*  
34 2020;**172**:577–82. doi:10.7326/M20-0504  
35  
36 30 Weiss P, Murdoch DR. Clinical course and mortality risk of severe COVID-19. *Lancet*  
37 2020;**395**:1014–5. doi:10.1016/S0140-6736(20)30633-4  
38  
39 31 CDC COVID-19 Response Team. Severe Outcomes Among Patients with Coronavirus Disease  
40 2019 (COVID-19) — United States, February 12–March 16, 2020. *MMWR Morb Mortal Wkly*  
41 *Rep* 2020;**69**. doi:10.15585/mmwr.mm6912e2  
42  
43 32 Garg S. Hospitalization Rates and Characteristics of Patients Hospitalized with Laboratory-  
44 Confirmed Coronavirus Disease 2019 — COVID-NET, 14 States, March 1–30, 2020. *MMWR*  
45 *Morb Mortal Wkly Rep* 2020;**69**:458–64. doi:10.15585/mmwr.mm6915e3  
46  
47 33 Klein E, Laxminarayan R, Smith DL, *et al*. Economic incentives and mathematical models of  
48 disease. *Environ Dev Econ* 2007;**12**:707–32.  
49  
50 34 Mboera LEG, Akipede GO, Banerjee A, *et al*. Mitigating lockdown challenges in response to  
51 COVID-19 in Sub-Saharan Africa. *Int J Infect Dis* 2020;**96**:308–10.  
52 doi:10.1016/j.ijid.2020.05.018  
53  
54 35 Isbell T. COVID-19 lockdown in South Africa highlights unequal access to services.  
55 Afrobarometer. 2020.[http://www.afrobarometer.org/publications/ad358-covid-19-lockdown-south-](http://www.afrobarometer.org/publications/ad358-covid-19-lockdown-south-africa-highlights-unequal-access-services)  
56 [africa-highlights-unequal-access-services](http://www.afrobarometer.org/publications/ad358-covid-19-lockdown-south-africa-highlights-unequal-access-services)  
57  
58 36 International Labour Organization. Women and men in the informal economy: A statistical  
59 picture. Third edition. 2018.  
60  
61 37 World Bank. Poverty headcount ratio at \$1.90 a day (2011 PPP) (% of population).  
62  
63 38 WHO, UNICEF. Progress on drinking water, sanitation and hygiene: 2017 update and SDG

- 1  
2  
3 baselines.
- 4  
5 39 UN Habitat. UN's Millenium Development Goals database. Geneva:
- 6  
7 40 UN High Commissioner for Refugees. Update of UNHCR's operations in Africa. 2019.
- 8  
9 41 Bosu WK, Reilly ST, Aheto JMK, *et al.* Hypertension in older adults in Africa: A systematic  
10 review and meta-analysis. *PLoS One* 2019;**14**:e0214934–e0214934.  
11 doi:10.1371/journal.pone.0214934
- 12  
13 42 Gouda HN, Charlson F, Sorsdahl K, *et al.* Burden of non-communicable diseases in sub-Saharan  
14 Africa, 1990-2017: results from the Global Burden of Disease Study 2017. *Lancet Glob Heal*  
15 2019;**7**:e1375–87. doi:10.1016/S2214-109X(19)30374-2
- 16  
17 43 Saeedi PP. Global and regional diabetes prevalence estimates for 2019 and projections for 2030  
18 and 2045: Results from the International Diabetes Federation Diabetes Atlas, 9th edition. In:  
19 *Diabetes Research and Clinical Practice*. 2019.
- 20  
21 44 McCoy T, Traiano H. In the developing world, the coronavirus is killing far more young people.  
22 Washington Post. 2020.[https://www.washingtonpost.com/world/the\\_americas/coronavirus-brazil-](https://www.washingtonpost.com/world/the_americas/coronavirus-brazil-killing-young-developing-world/2020/05/22/f76d83e8-99e9-11ea-ad79-eef7cd734641_story.html)  
23 [killing-young-developing-world/2020/05/22/f76d83e8-99e9-11ea-ad79-eef7cd734641\\_story.html](https://www.washingtonpost.com/world/the_americas/coronavirus-brazil-killing-young-developing-world/2020/05/22/f76d83e8-99e9-11ea-ad79-eef7cd734641_story.html)
- 24  
25 45 Kamiya Y, Kamiya Y, Hertog S. Households and Living Arrangements of Older Persons Around  
26 the World. *Innov Aging* 2019;**3**:S806–S806. doi:10.1093/geroni/igz038.2967
- 27  
28 46 UNAIDS. People living with HIV receiving ART. <http://aidsinfo.unaids.org/>
- 29  
30 47 Wu X, Nethery RC, Sabath MB, *et al.* Exposure to air pollution and COVID-19 mortality in the  
31 United States: A nationwide cross-sectional study. *medRxiv* Published Online First:  
32 2020.<https://www.medrxiv.org/content/10.1101/2020.04.05.20054502v2.full.pdf>
- 33  
34 48 Conticini E, Frediani B, Caro D. Can atmospheric pollution be considered a co-factor in extremely  
35 high level of SARS-CoV-2 lethality in Northern Italy? *Environ Pollut* 2020;**261**:114465.  
36 doi:10.1016/j.envpol.2020.114465
- 37  
38 49 Amegah AK, Agyei-Mensah S. Urban air pollution in Sub-Saharan Africa: Time for action.  
39 *Environ Pollut* 2017;**220**:738–43. doi:10.1016/j.envpol.2016.09.042
- 40  
41 50 Our World In Data. Coronavirus (COVID-19) Testing. [https://ourworldindata.org/coronavirus-](https://ourworldindata.org/coronavirus-testing)  
42 [testing](https://ourworldindata.org/coronavirus-testing)
- 43  
44 51 Narayanan K, Frost I, Heidarzadeh A, *et al.* Pooling RT-PCR or NGS samples has the potential to  
45 cost-effectively generate estimates of COVID-19 prevalence in resource limited environments.  
46 *medRxiv* Published Online First:  
47 2020.<https://www.medrxiv.org/content/10.1101/2020.04.03.20051995v1>
- 48  
49 52 Abbott S, Kucharski AJ, Funk S. Estimating the overdispersion in COVID-19 transmission using  
50 outbreak sizes outside China. *Well* 2020;:1–8.
- 51  
52  
53  
54  
55  
56  
57  
58  
59

## FIGURE LEGENDS

Figure 1. Modified SEIR model structure. Susceptible individuals,  $S$ , become exposed,  $E$ , to SARS-CoV-2. A proportion of these individuals become symptomatically infected with severe symptoms,  $I_S$ , or non-severe, symptoms,  $I_N$ , while the rest become contagious with mild or no symptoms,  $C$ . Asymptomatic or mildly symptomatic, moderately symptomatic and severely symptomatic individuals recover,  $R$ , and severely infected individuals may also die,  $D$ .

Figure 2. Projected total infections over time when parameters are normalized for the age distribution of the population in each country. Areas shaded in grey denote lockdown duration. SD denotes 'social distancing.'

Figure 3. Projected total infections over time when parameters are normalized for the age distribution of the population in each country and the fraction of the under 70-year-old population with HIV/AIDS and or TB. Areas shaded in grey denote lockdown duration.

Figure 4. Percent change in peak severe infections under moderate lockdown scenario, parameters adjusted by age only.

Figure 5. Percent change in peak total infections under interventions, compared to baseline, parameters adjusted by age only. Values in parentheses represent the duration of lockdown in the respective countries. Percent change was calculated relative to a baseline scenario of disease spread with no intervention.

1  
2  
3  
4  
5  
6  
7  
8  
9  
10  
11  
12  
13  
14  
15  
16  
17  
18  
19  
20  
21  
22  
23  
24  
25  
26  
27  
28  
29  
30  
31  
32  
33  
34  
35  
36  
37  
38  
39  
40  
41  
42  
43  
44  
45  
46  
47  
48  
49  
50  
51  
52  
53  
54  
55  
56  
57  
58  
59  
60

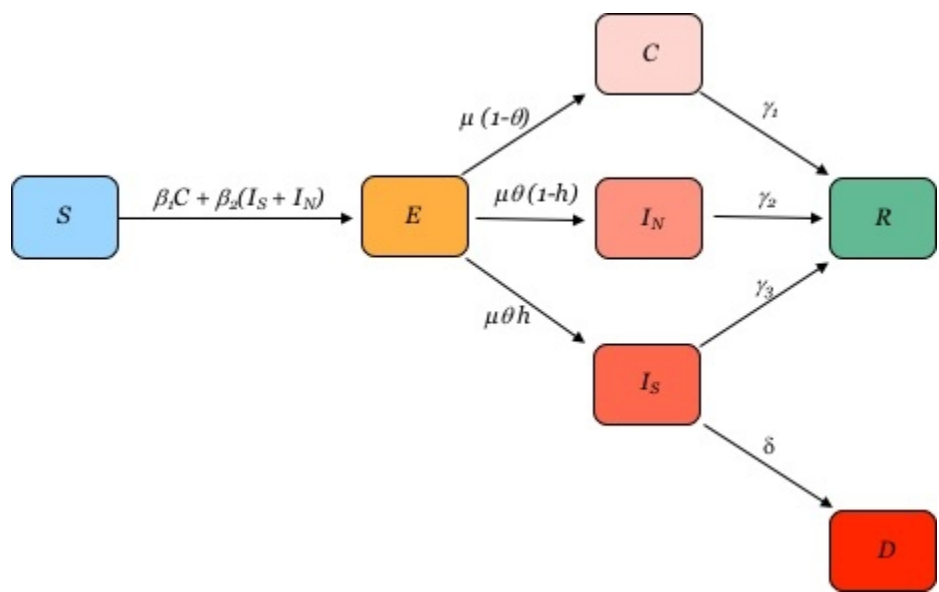

163x101mm (72 x 72 DPI)

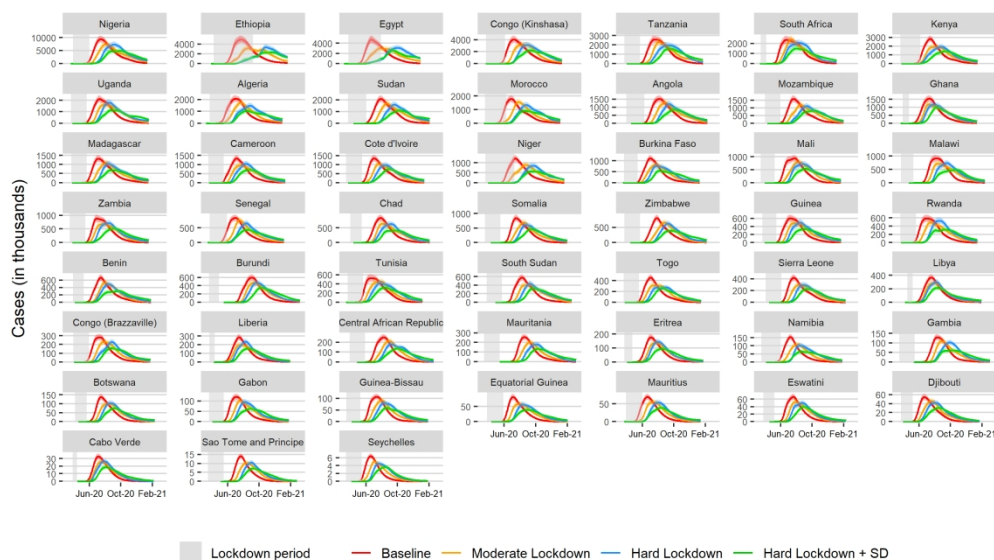

Figure 2. Projected total infections over time when parameters are normalized for the age distribution of the population in each country. Areas shaded in grey denote lockdown duration. SD denotes 'social distancing.'



1  
2  
3  
4  
5  
6  
7  
8  
9  
10  
11  
12  
13  
14  
15  
16  
17  
18  
19  
20  
21  
22  
23  
24  
25  
26  
27  
28  
29  
30  
31  
32  
33  
34  
35  
36  
37  
38  
39  
40  
41  
42  
43  
44  
45  
46  
47  
48  
49  
50  
51  
52  
53  
54  
55  
56  
57  
58  
59  
60

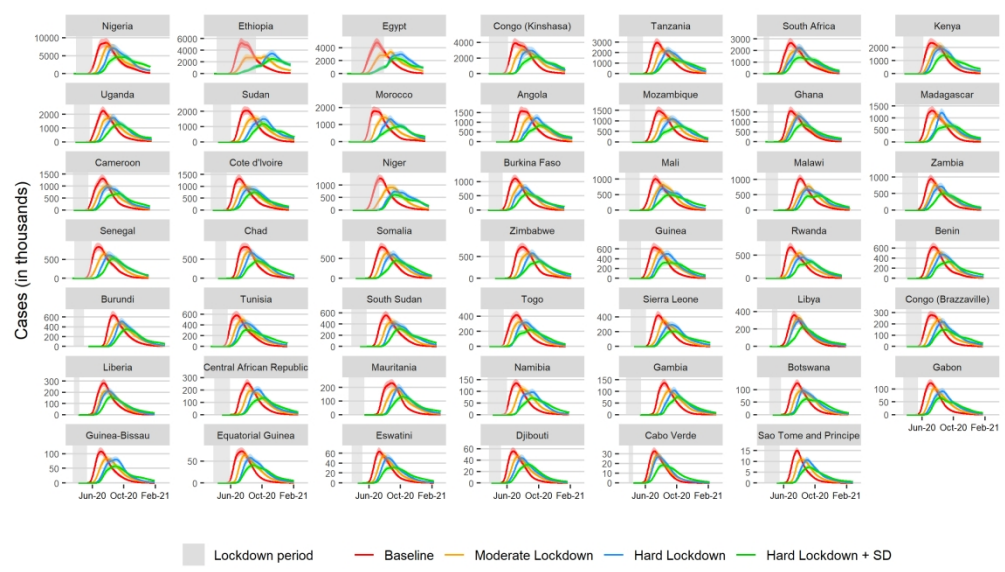

Figure 3. Percent change in peak severe infections under moderate lockdown scenario, parameters adjusted by age only.

1  
2  
3  
4  
5  
6  
7  
8  
9  
10  
11  
12  
13  
14  
15  
16  
17  
18  
19  
20  
21  
22  
23  
24  
25  
26  
27  
28  
29  
30  
31  
32  
33  
34  
35  
36  
37  
38  
39  
40  
41  
42  
43  
44  
45  
46  
47  
48  
49  
50  
51  
52  
53  
54  
55  
56  
57  
58  
59  
60

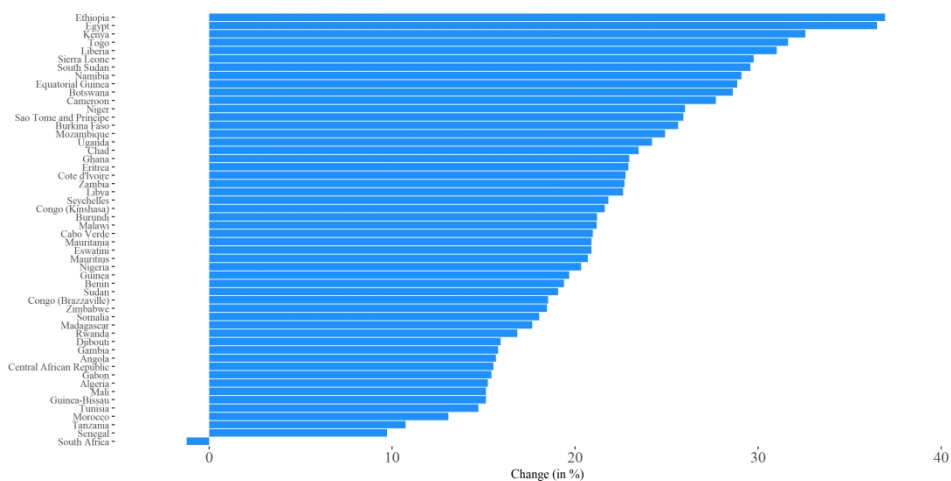

Figure 4. Percent change in peak total infections under interventions, compared to baseline, parameters adjusted by age only. Values in parentheses represent the duration of lockdown in the respective countries. Percent change was calculated relative to a baseline scenario of disease spread with no intervention.

1  
2  
3  
4  
5  
6  
7  
8  
9  
10  
11  
12  
13  
14  
15  
16  
17  
18  
19  
20  
21  
22  
23  
24  
25  
26  
27  
28  
29  
30  
31  
32  
33  
34  
35  
36  
37  
38  
39  
40  
41  
42  
43  
44  
45  
46  
47  
48  
49  
50  
51  
52  
53  
54  
55  
56  
57  
58  
59  
60

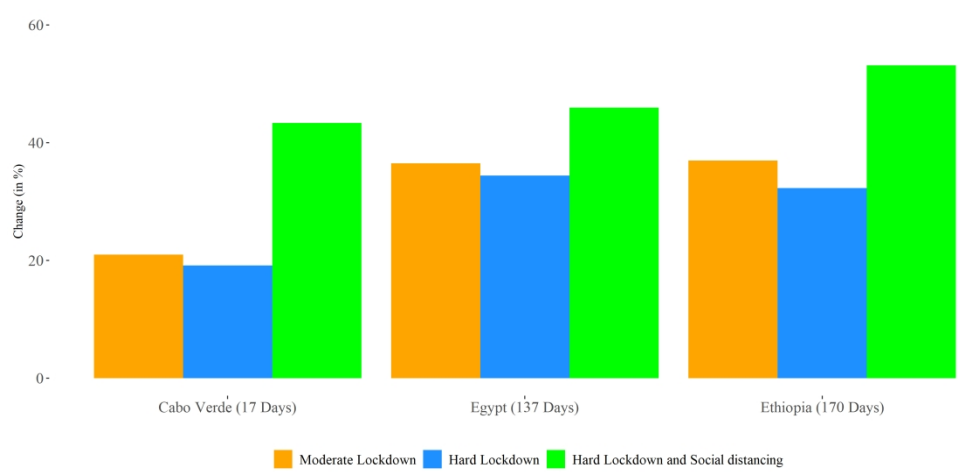

Figure 5. Projected total infections over time when parameters are normalized for the age distribution of the population in each country and the fraction of the under 70-year-old population with HIV/AIDS and or TB. Areas shaded in grey denote lockdown duration.

## Supplementary Materials

### *Estimation of Epidemiological Parameters*

Parameters are estimated from the literature and the sources for this are outlined in Table 1. The basic reproduction number,  $R_0$ , was gathered from a systematic review for which the average value was 3.1 and the range of values was 1.9 – 6.5.[1] The infection rate for symptomatic transmissions,  $\beta_1$  was calculated using the  $R_0$  of COVID-19 divided by the infectious period for mild/asymptomatic cases and moderate/severe cases, respectively, taken from.[2–4] The asymptomatic rate in Wanzhou District, China was 20.8%, [5] this gave a value of 0.792 for the asymptomatic rate, the upper bound of 0.815 (asymptomatic rate of 18.5%) is taken from the Diamond Princess cruise ship [6] and the lower bound of 0.568 is taken from the Italian town of Vo, [7] where the asymptomatic rate was 43.2%. The infection rate for symptomatic infection,  $\beta_1$ , was calculated using  $R_0$  and the infectious period assumed from other coronaviruses of 5 days [4]. The reduction in infection rate for asymptomatic patients,  $\alpha$ , was based a model fitted to data from Wuhan. [8] The clearance rate for asymptomatic infection,  $\gamma_1$ , is calculated as the inverse of the infectious period which has an upper bound of 3.48 days, according to data collected in China, [8] a lower bound of 19 days using data on the viral load in asymptomatic patients [5] and the main value is the central point between the two. The clearance rate for symptomatic non-severe and severe cases,  $\gamma_2$  and  $\gamma_3$ , is the inverse of the infectious period, which was estimated as 5 to 7 days [9,10] and 3 to 7 days [11] in the literature. The incubation rate,  $\mu$ , was the inverse of the incubation time which averaged 4.8 days, and ranged from 1 to 14 days [12,13]. The severe case fatality rate,  $\delta$ , ranges from 20.9 percent [14], in South Africa, to 28 percent in China [15]. The relative increase in progression to severe disease in those with HIV/AIDS and/or TB,  $\kappa$ , was assumed to be 2.14 (1.1-2.7) using estimates from South Africa. [14,16]

## Supplementary Figures

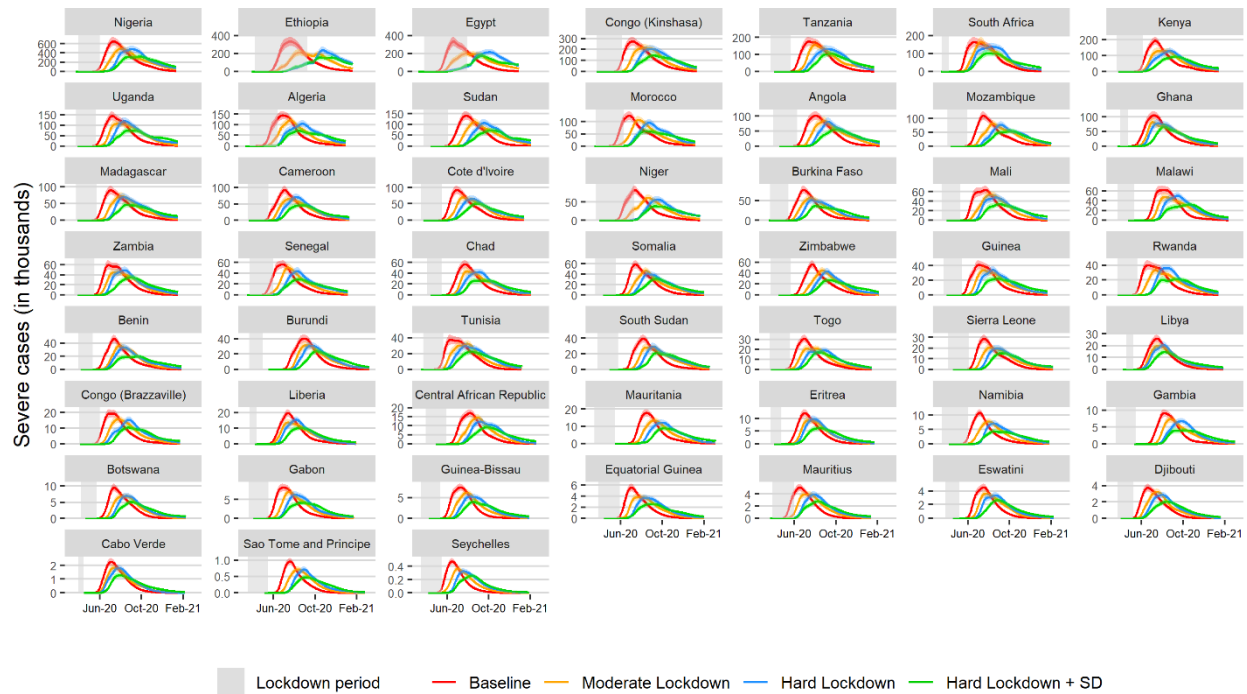

Figure S1 Projected severe infections over time when parameters are normalized for the age distribution of the population in each country. Areas shaded in grey denote lockdown duration.

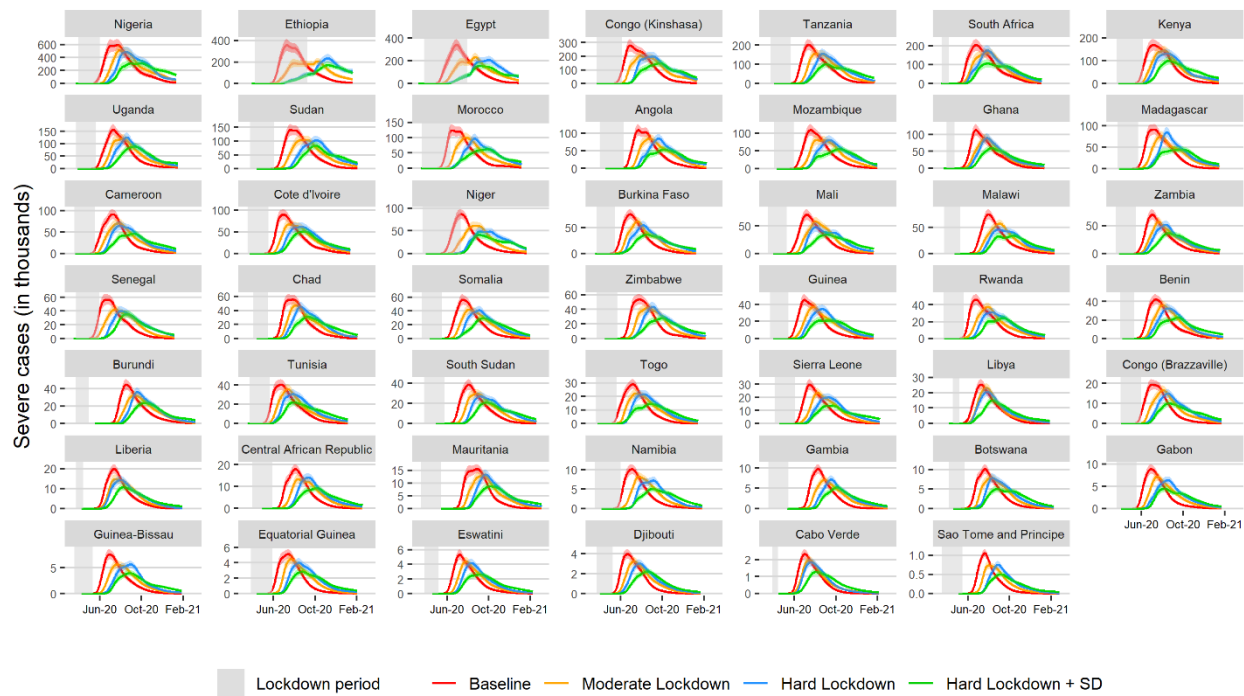

Figure S2. Projected severe infections over time when parameters are normalized for the age distribution of the population in each country and the fraction of the under 70-year-old population with HIV/AIDS and or TB. Areas shaded in grey denote lockdown duration.

1  
2  
3  
4  
5  
6  
7  
8  
9  
10  
11  
12  
13  
14  
15  
16  
17  
18  
19  
20  
21  
22  
23  
24  
25  
26  
27  
28  
29  
30  
31  
32  
33  
34  
35  
36  
37  
38  
39  
40  
41  
42  
43  
44  
45  
46  
47  
48  
49  
50  
51  
52  
53  
54  
55  
56  
57  
58  
59  
60

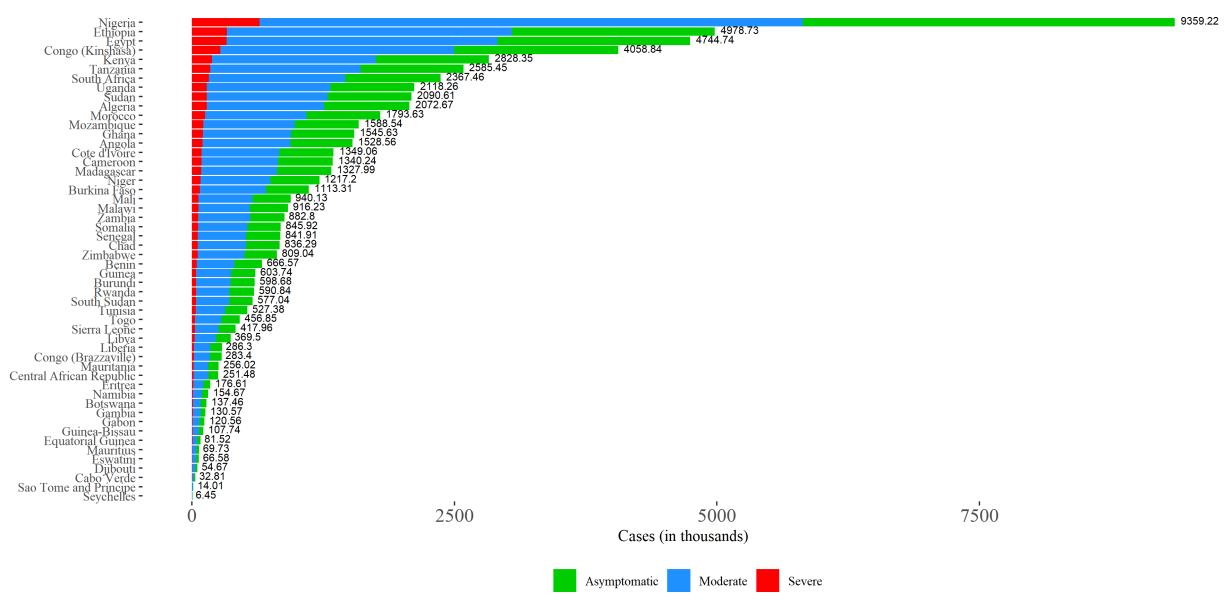

Figure S3. Peak number of infections by country under the baseline scenario, parameters adjusted by age only.

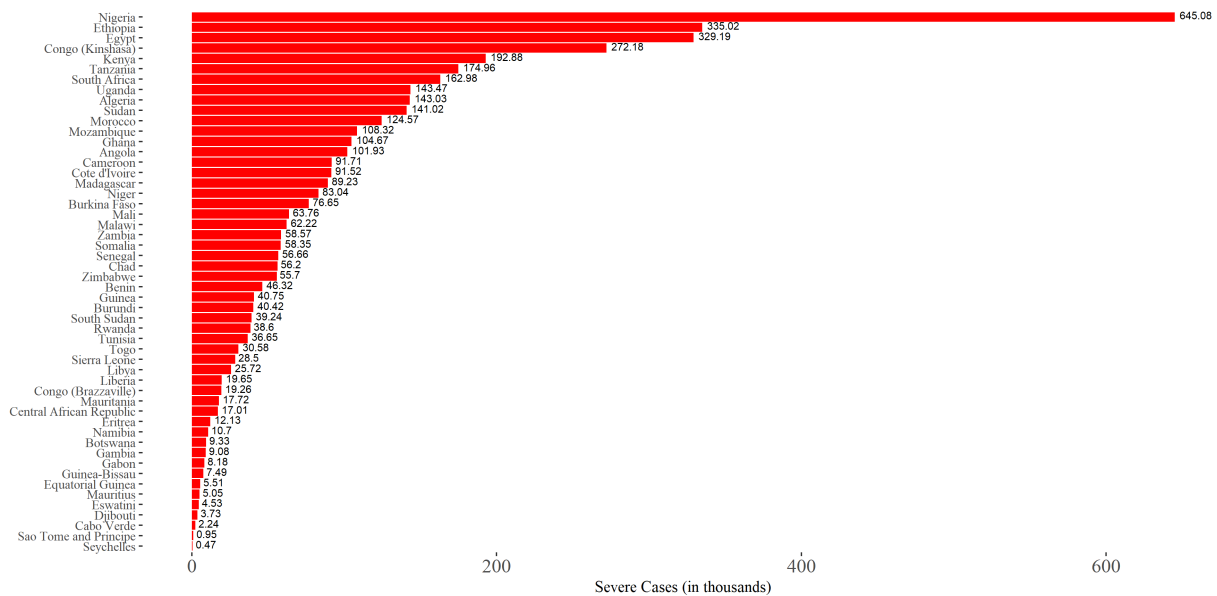

Figure S4. Peak number of severe infections by country under the baseline scenario, parameters adjusted by age only.



1  
2  
3  
4  
5  
6  
7  
8  
9  
10  
11  
12  
13  
14  
15  
16  
17  
18  
19  
20  
21  
22  
23  
24  
25  
26  
27  
28  
29  
30  
31  
32  
33  
34  
35  
36  
37  
38  
39  
40  
41  
42  
43  
44  
45  
46  
47  
48  
49  
50  
51  
52  
53  
54  
55  
56  
57  
58  
59  
60

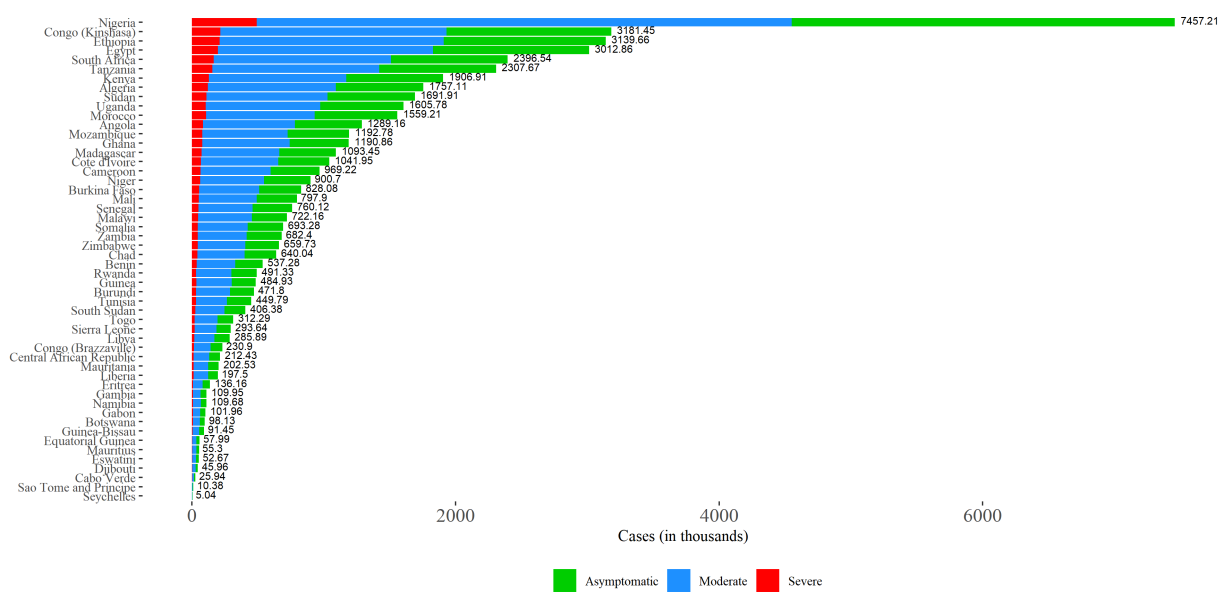

Figure S5. Peak number of infections by country with a moderate lockdown (Scenario 1), parameters adjusted by age only.

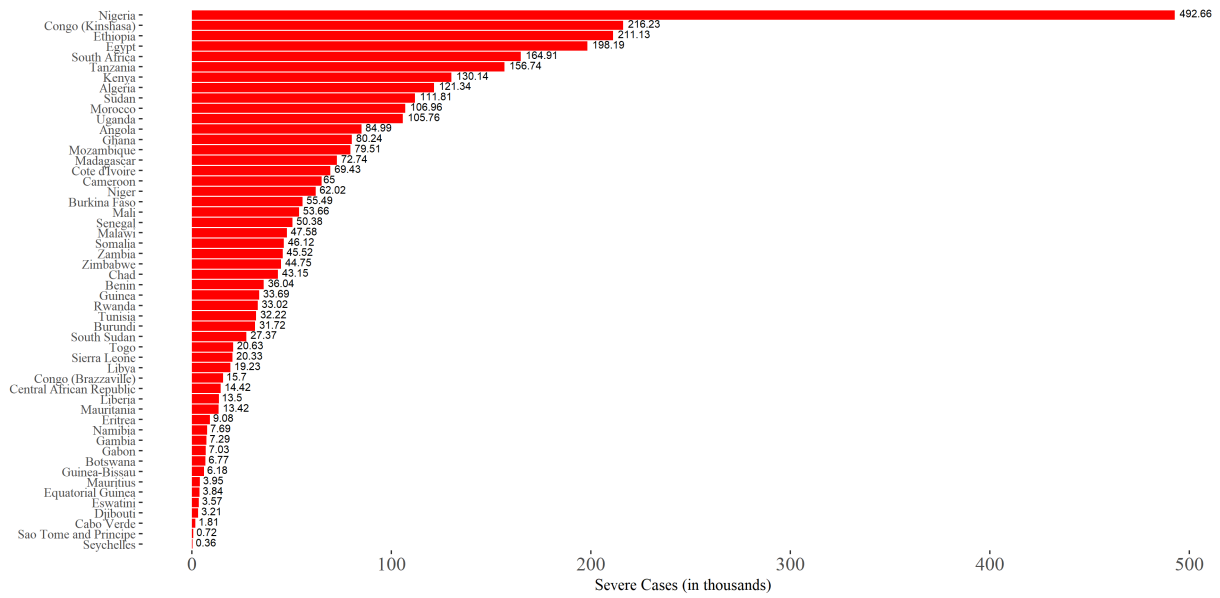

Figure S6. Peak number of severe infections by country with a moderate lockdown (Scenario 1), parameters adjusted by age only.

1  
2  
3  
4  
5  
6  
7  
8  
9  
10  
11  
12  
13  
14  
15  
16  
17  
18  
19  
20  
21  
22  
23  
24  
25  
26  
27  
28  
29  
30  
31  
32  
33  
34  
35  
36  
37  
38  
39  
40  
41  
42  
43  
44  
45  
46  
47  
48  
49  
50  
51  
52  
53  
54  
55  
56  
57  
58  
59  
60

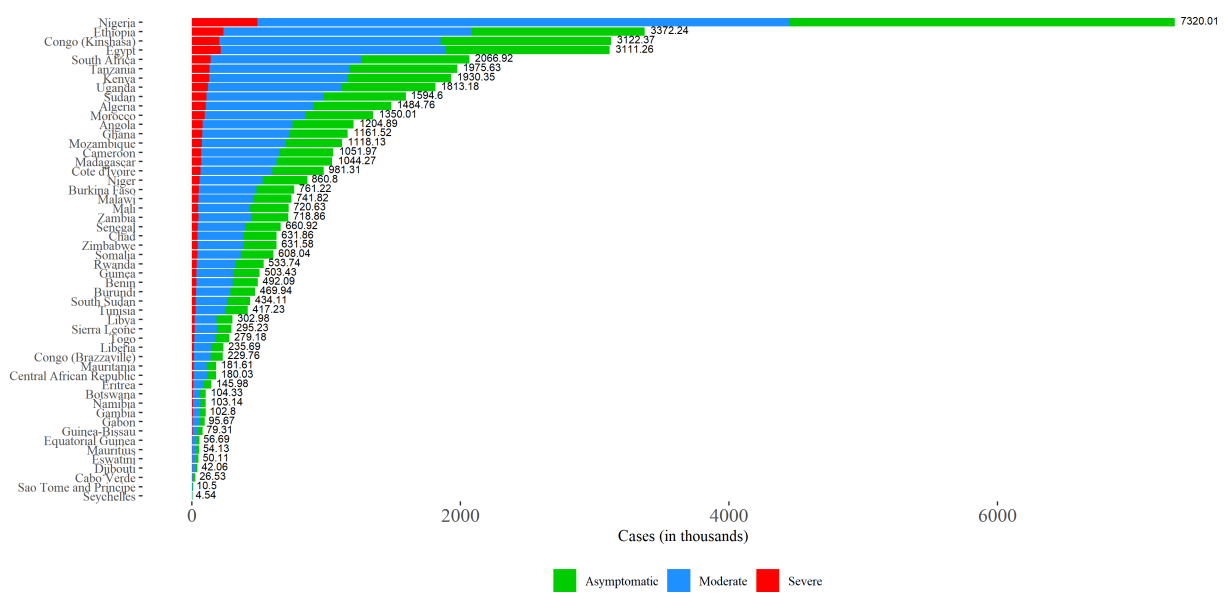

Figure S7. Peak number of infections by country with a hard lockdown (Scenario 2), parameters adjusted by age only.

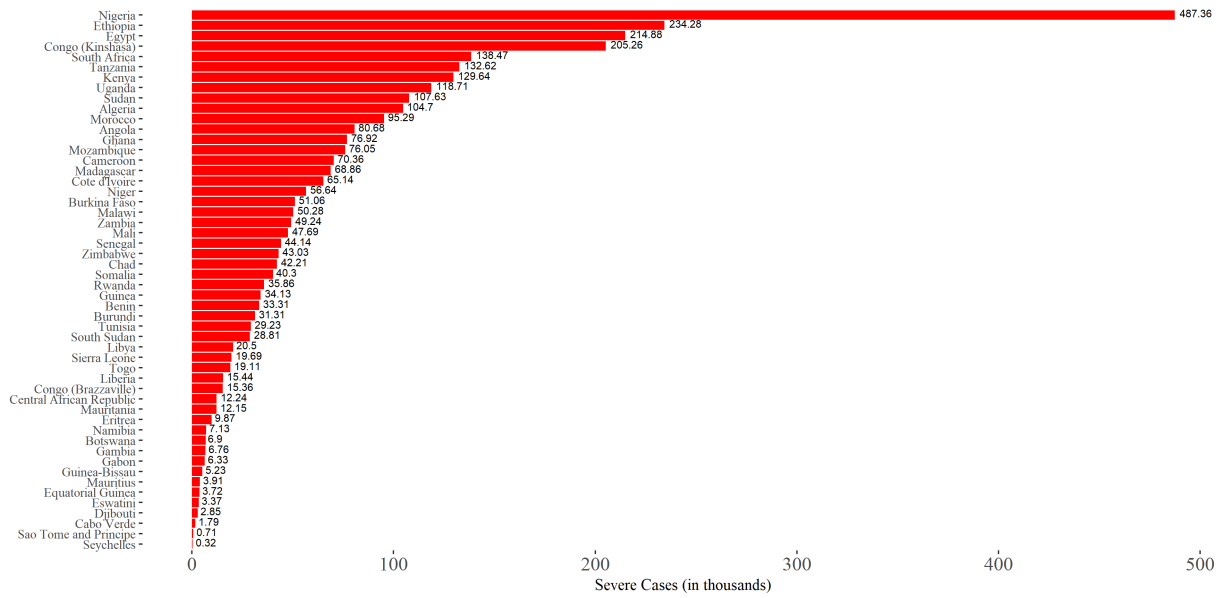

Figure S8. Peak number of severe infections by country with a hard lockdown (Scenario 2), parameters adjusted by age only.

1  
2  
3  
4  
5  
6  
7  
8  
9  
10  
11  
12  
13  
14  
15  
16  
17  
18  
19  
20  
21  
22  
23  
24  
25  
26  
27  
28  
29  
30  
31  
32  
33  
34  
35  
36  
37  
38  
39  
40  
41  
42  
43  
44  
45  
46  
47  
48  
49  
50  
51  
52  
53  
54  
55  
56  
57  
58  
59  
60

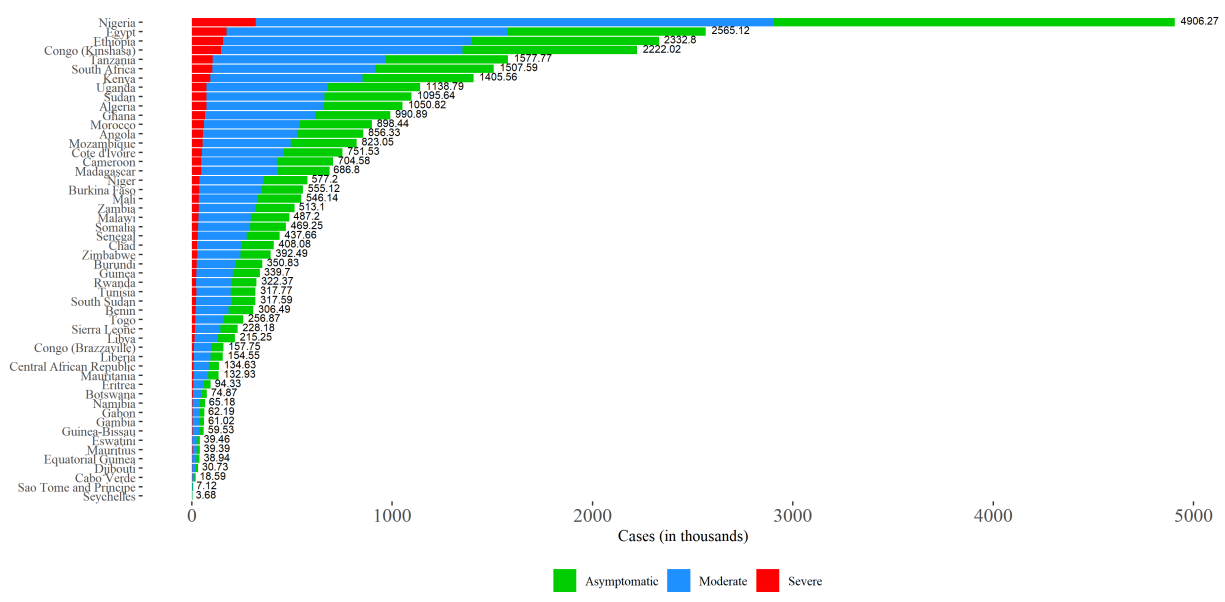

Figure S9. Peak number of infections by country with a hard lockdown followed by further measures such as social distancing (Scenario 3), parameters adjusted by age only.

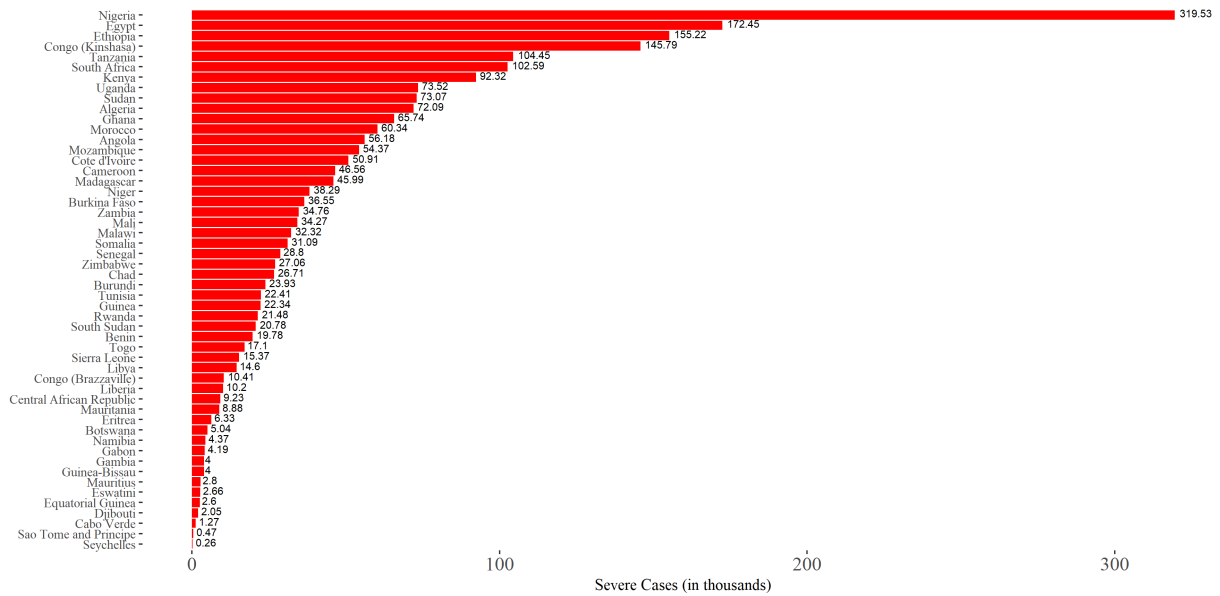

Figure S10. Peak number of severe infections by country with a hard lockdown followed by further measures such as social distancing (Scenario 3), parameters adjusted by age only.

1  
2  
3  
4  
5  
6  
7  
8  
9  
10  
11  
12  
13  
14  
15  
16  
17  
18  
19  
20  
21  
22  
23  
24  
25  
26  
27  
28  
29  
30  
31  
32  
33  
34  
35  
36  
37  
38  
39  
40  
41  
42  
43  
44  
45  
46  
47  
48  
49  
50  
51  
52  
53  
54  
55  
56  
57  
58  
59  
60

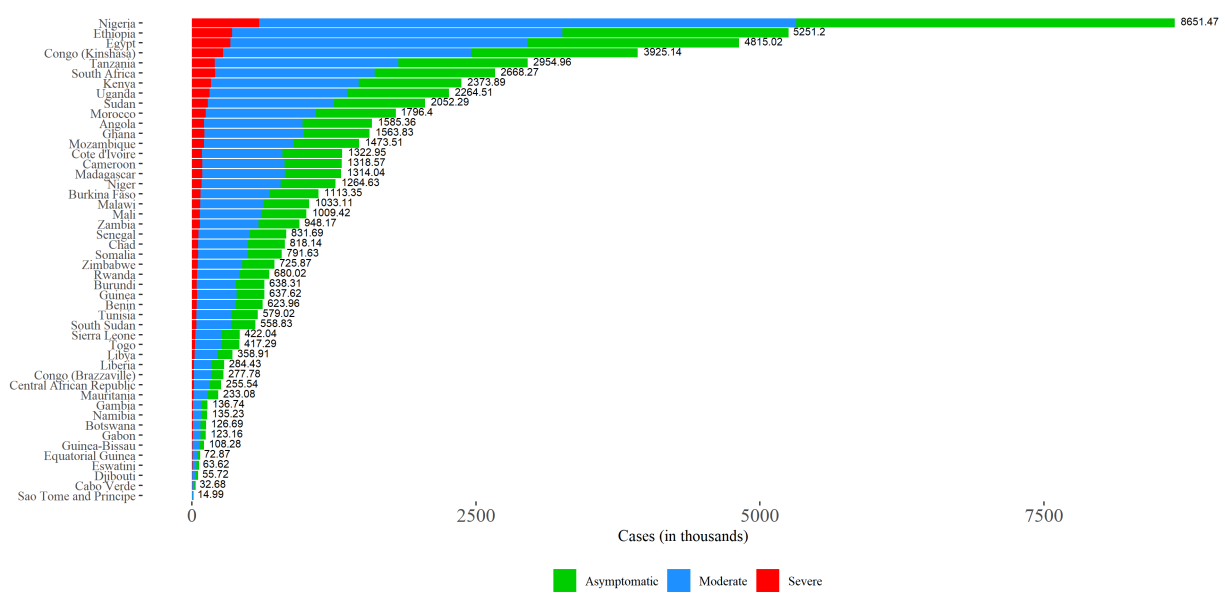

Figure S11. Peak number of infections by country under the baseline scenario, parameters adjusted by age and fraction of the under 70-year-old population with TB and/or HIV/AIDS.

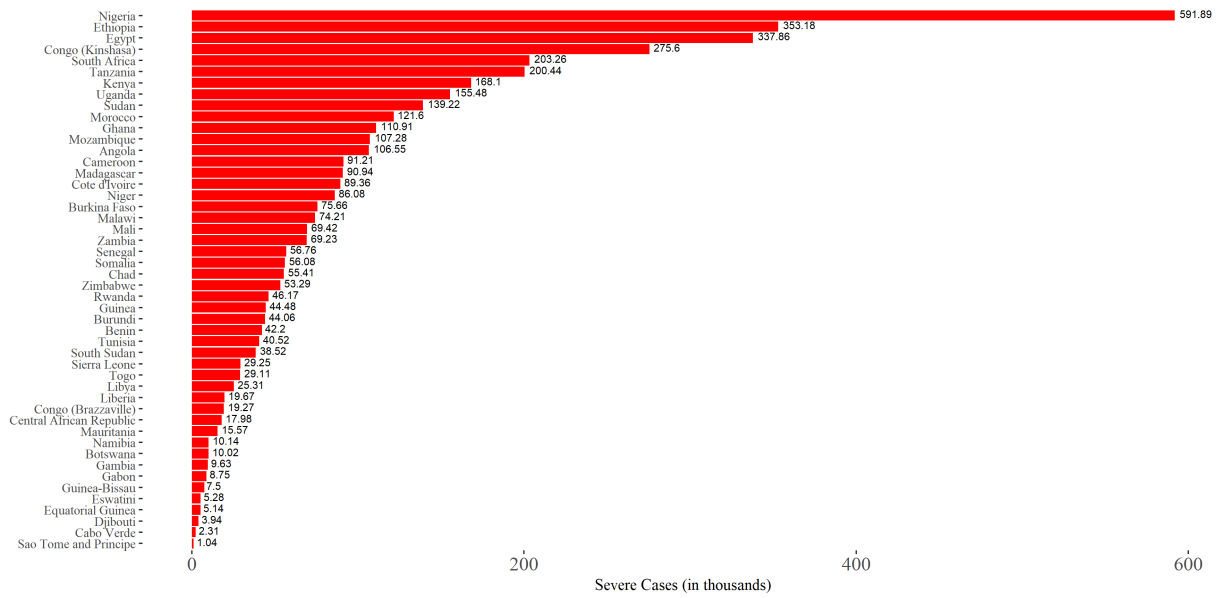

Figure S12. Peak number of severe infections by country under the baseline scenario, parameters adjusted by age and fraction of the under 70-year-old population with TB and/or HIV/AIDS.



1  
2  
3  
4  
5  
6  
7  
8  
9  
10  
11  
12  
13  
14  
15  
16  
17  
18  
19  
20  
21  
22  
23  
24  
25  
26  
27  
28  
29  
30  
31  
32  
33  
34  
35  
36  
37  
38  
39  
40  
41  
42  
43  
44  
45  
46  
47  
48  
49  
50  
51  
52  
53  
54  
55  
56  
57  
58  
59  
60

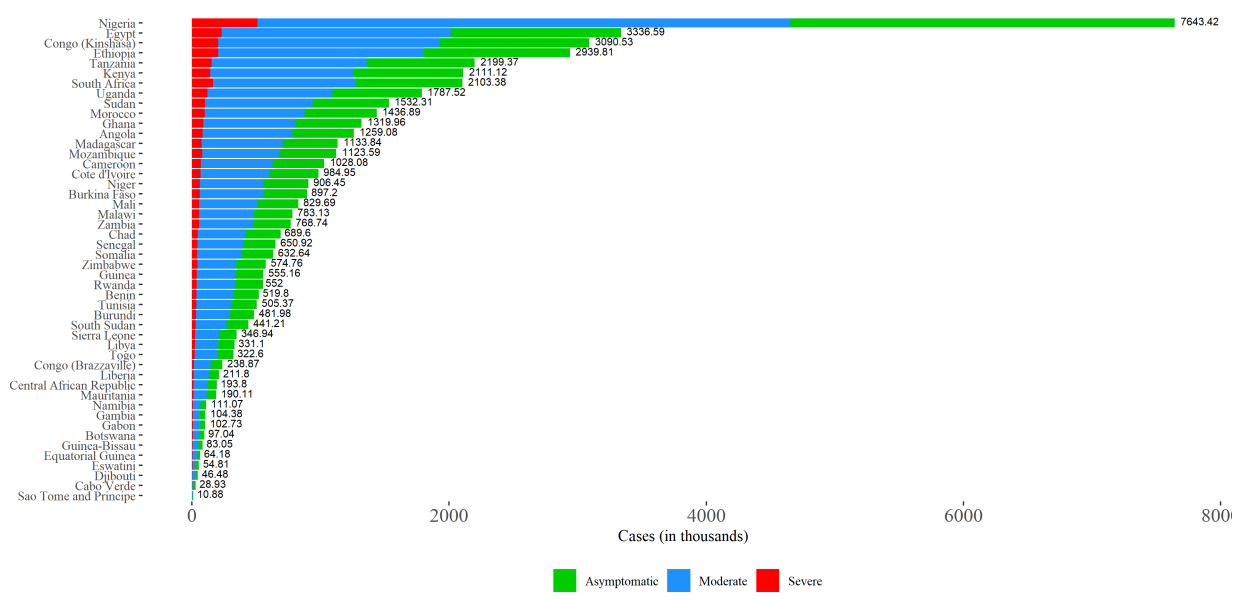

Figure S13. Peak number of infections by country with a moderate lockdown (Scenario 1), parameters adjusted by age and fraction of the under 70-year-old population with TB and/or HIV/AIDS.

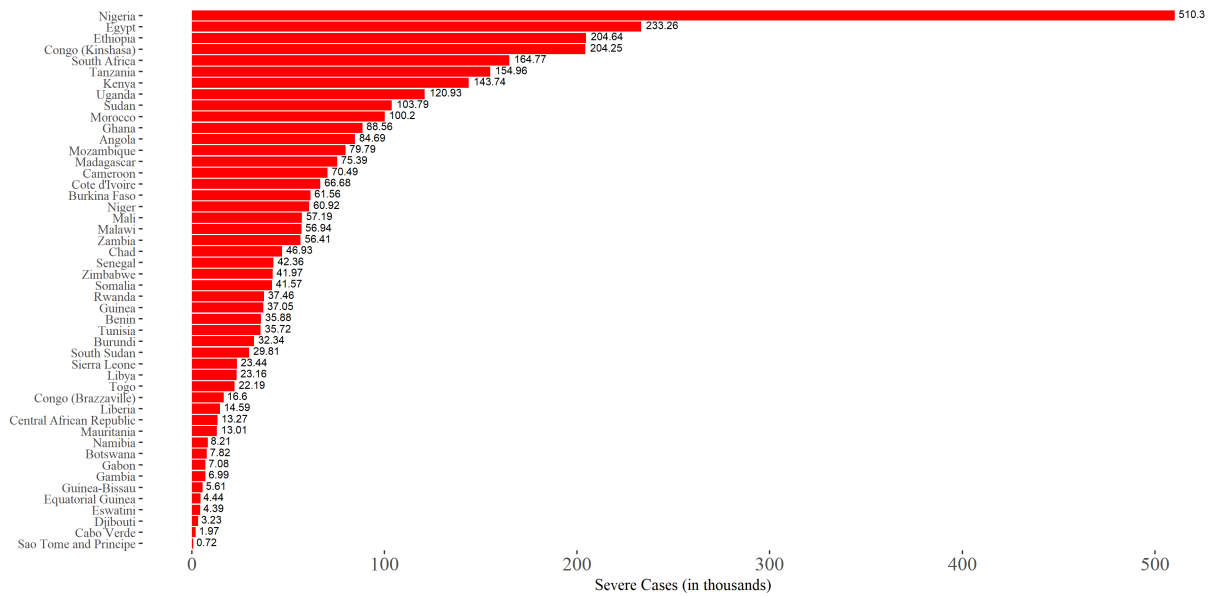

Figure S14. Peak number of severe infections by country with a moderate lockdown (Scenario 1), parameters adjusted by age and fraction of the under 70-year-old population with TB and/or HIV/AIDS.

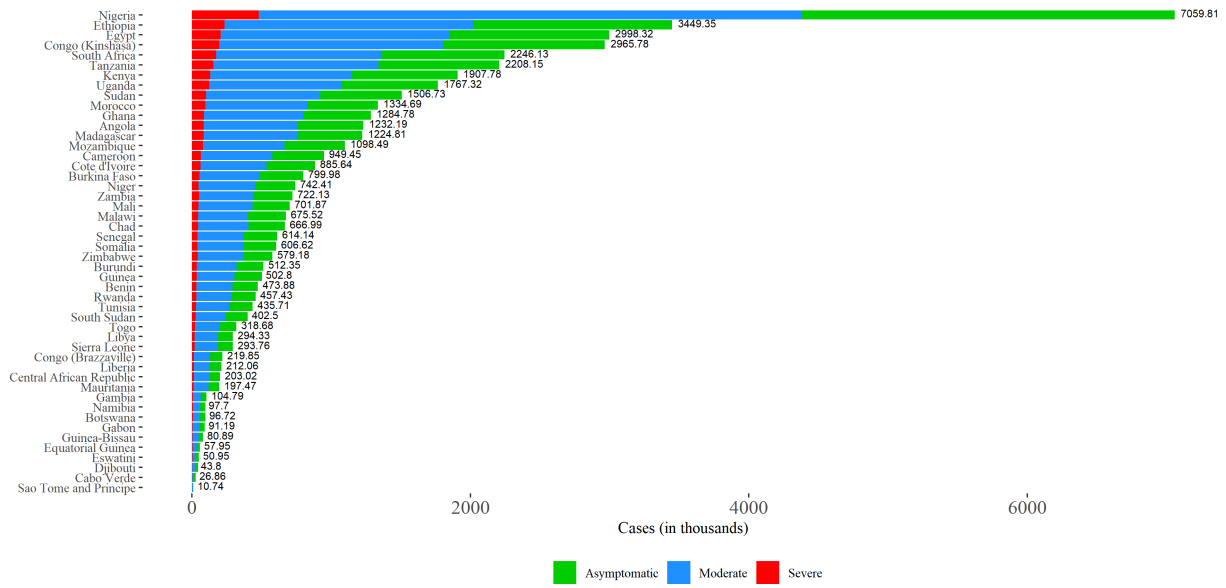

Figure S15. Peak number of infections by country with a hard lockdown (Scenario 2), parameters adjusted by age and fraction of the under 70-year-old population with TB and/or HIV/AIDS.

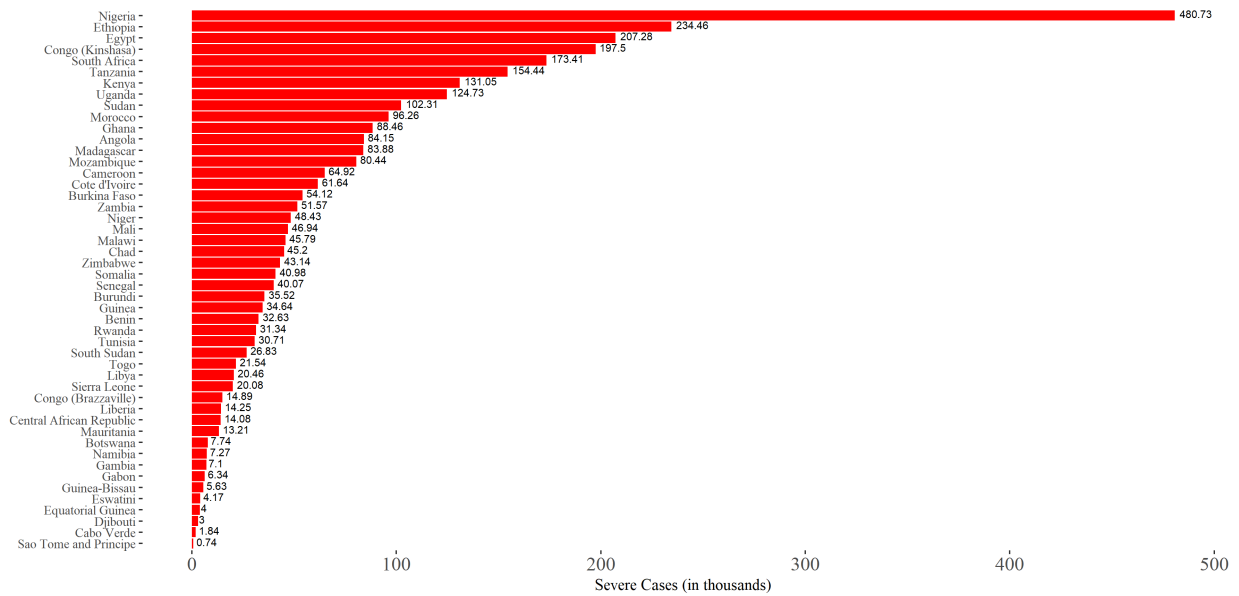

Figure S16. Peak number of severe infections by country with a hard lockdown (Scenario 2), parameters adjusted by age and fraction of the under 70-year-old population with TB and/or HIV/AIDS.

1  
2  
3  
4  
5  
6  
7  
8  
9  
10  
11  
12  
13  
14  
15  
16  
17  
18  
19  
20  
21  
22  
23  
24  
25  
26  
27  
28  
29  
30  
31  
32  
33  
34  
35  
36  
37  
38  
39  
40  
41  
42  
43  
44  
45  
46  
47  
48  
49  
50  
51  
52  
53  
54  
55  
56  
57  
58  
59  
60

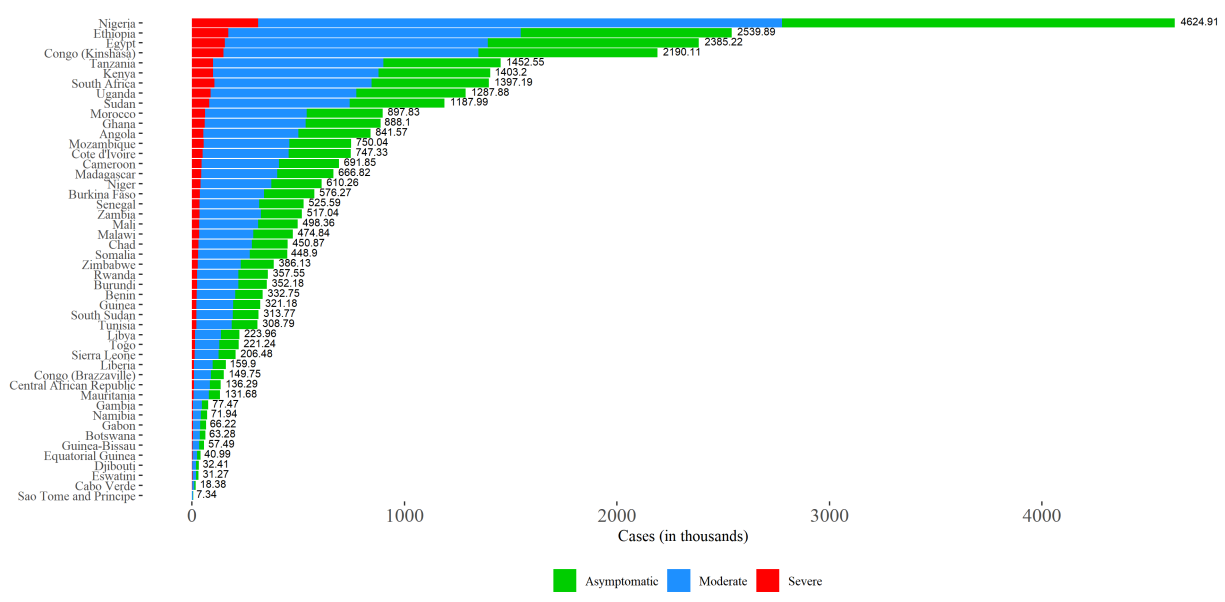

Figure S17. Peak number of infections by country with a hard lockdown followed by further measures such as social distancing (Scenario 3), parameters adjusted by age only.

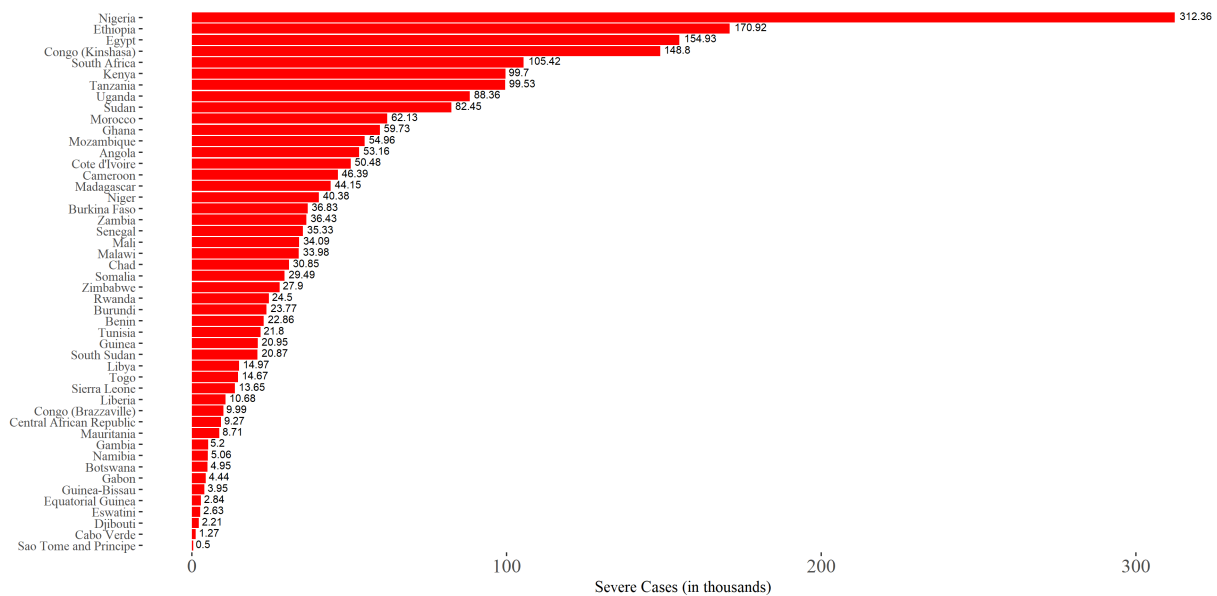

Figure S18. Peak number of severe infections by country with a hard lockdown followed by further measures such as social distancing (Scenario 3), parameters adjusted by age only.

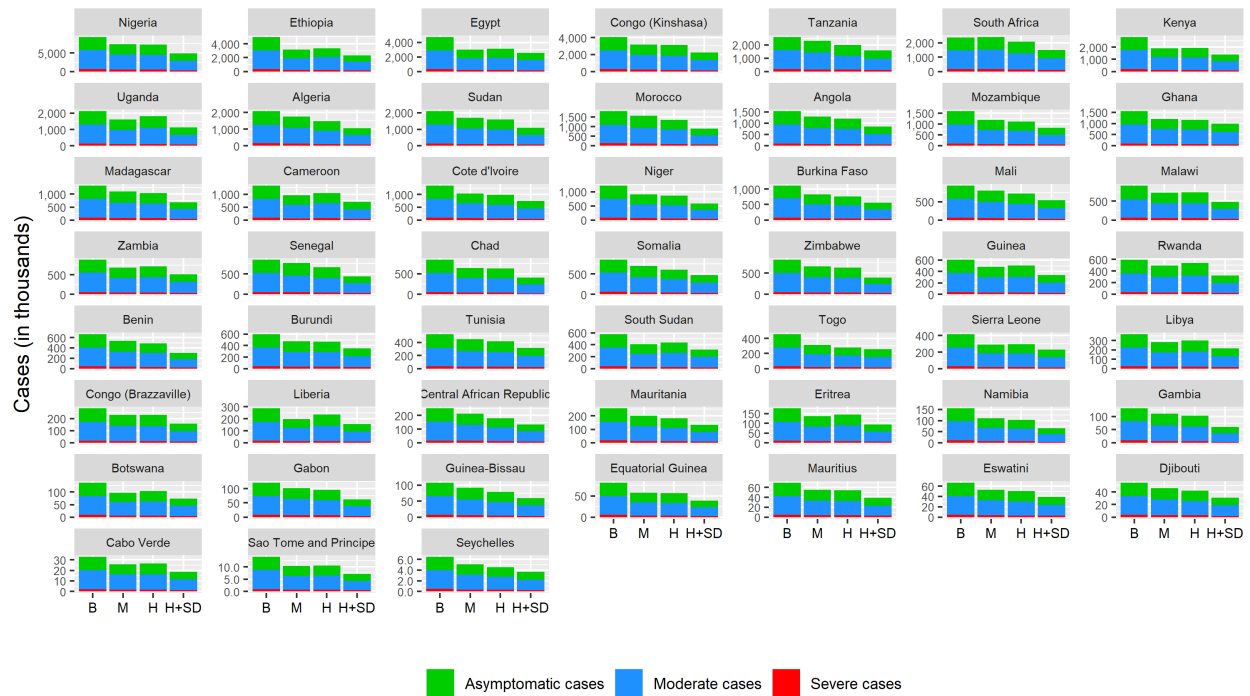

Figure S19. Projected peak infections and peak severe infections when parameters are normalized for the age distribution of the population in each country. Areas shaded in grey denote lockdown duration.

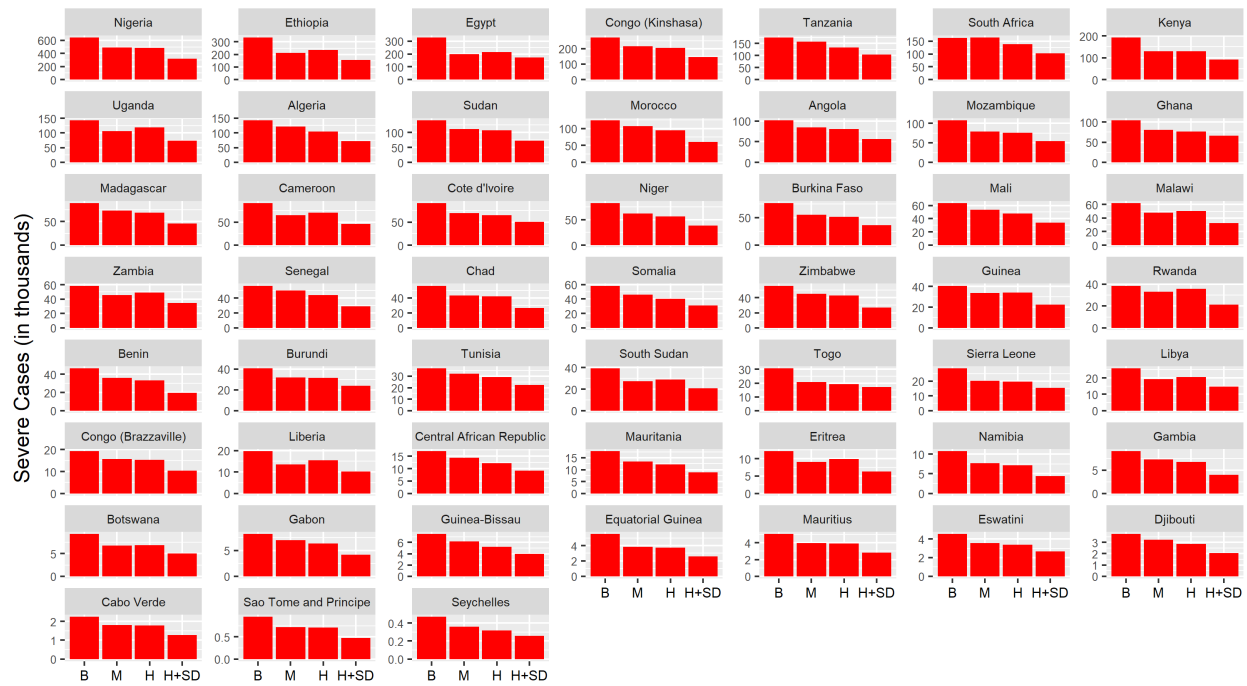

Figure S20. Projected peak severe infections and peak severe infections when parameters are normalized for the age distribution of the population in each country. Areas shaded in grey denote lockdown duration.



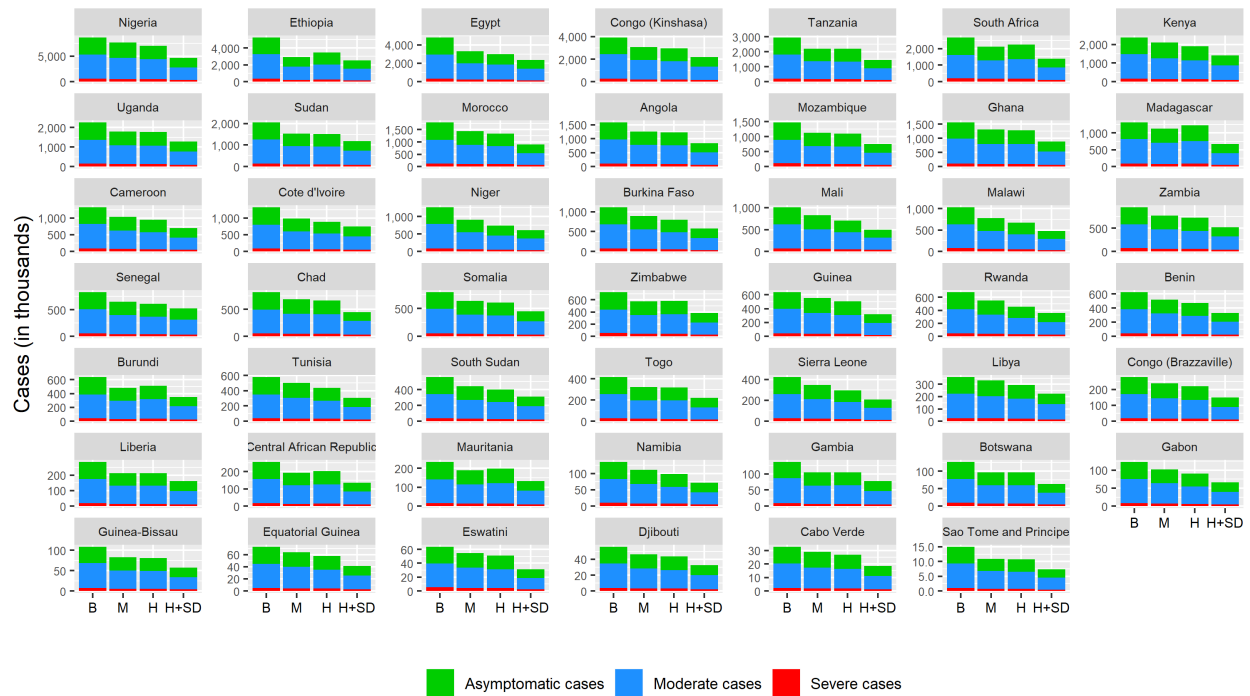

Figure S21. Projected peak infections and peak severe infections when parameters are normalized for the age distribution of the population in each country and the fraction of the under 70-year-old population with HIV/AIDS and or TB. Areas shaded in grey denote lockdown duration.

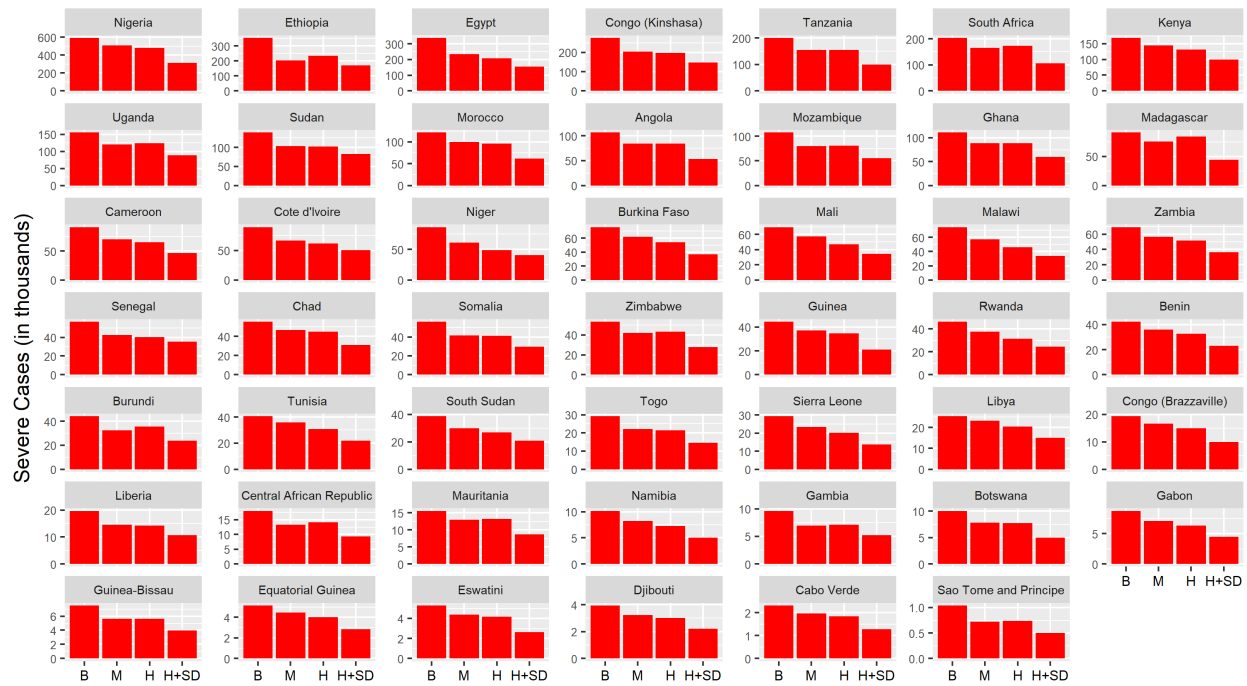

Figure S22. Projected peak severe infections and peak severe infections when parameters are normalized for the age distribution of the population in each country and the fraction of the under 70-year-old population with HIV/AIDS and or TB. Areas shaded in grey denote lockdown duration.

## References

- 1 Park M, Cook AR, Lim JT, *et al.* A Systematic Review of COVID-19 Epidemiology Based on Current Evidence. *J Clin Med* 2020;**9**:967. doi:10.3390/jcm9040967
- 2 Bi Q, Wu Y, Mei S, *et al.* Epidemiology and transmission of COVID-19 in 391 cases and 1286 of their close contacts in Shenzhen, China: a retrospective cohort study. *Lancet Infect Dis* 2020;**3099**:1–9. doi:10.1016/S1473-3099(20)30287-5
- 3 Wu JT, Leung K, Leung GM. Nowcasting and forecasting the potential domestic and international spread of the 2019-nCoV outbreak originating in Wuhan, China: a modelling study. *Lancet* 2020;**395**:689–97. doi:10.1016/S0140-6736(20)30260-9
- 4 Kissler SM, Tedijanto C, Goldstein E, *et al.* Projecting the transmission dynamics of SARS-CoV-2 through the postpandemic period. *Science (80- )* 2020;**368**:860–8. doi:10.1126/science.abb5793
- 5 Long QX, Tang XJ, Shi QL, *et al.* Clinical and immunological assessment of asymptomatic SARS-CoV-2 infections. *Nat Med* Published Online First: 2020. doi:10.1038/s41591-020-0965-6
- 6 Mizumoto K, Kagaya K, Zarebski A, *et al.* Estimating the asymptomatic proportion of coronavirus disease 2019 (COVID-19) cases on board the Diamond Princess cruise ship, Yokohama, Japan, 2020. *Eurosurveillance* 2020;**25**:1–5. doi:10.2807/1560-7917.ES.2020.25.10.2000180
- 7 Lavezzo E, Franchin E, Ciavarella C, *et al.* Suppression of COVID-19 outbreak in the municipality of Vo, Italy. *medRxiv* 2020;:2020.04.17.20053157. doi:10.1101/2020.04.17.20053157
- 8 Li R, Pei S, Chen B, *et al.* Substantial undocumented infection facilitates the rapid dissemination of novel coronavirus (SARS-CoV-2). *Science (80- )* 2020;**368**:489–93. doi:10.1126/science.abb3221
- 9 Prem K, Liu Y, Russell TW, *et al.* The effect of control strategies to reduce social mixing on outcomes of the COVID-19 epidemic in Wuhan, China: a modelling study. *Lancet Public Heal* 2020;**5**:e261–70. doi:10.1016/S2468-2667(20)30073-6
- 10 Woelfel R, Corman VM, Guggemos W, *et al.* Virological assessment of hospitalized cases of coronavirus disease 2019. *medRxiv* 2020;:2020.03.05.20030502. doi:10.1101/2020.03.05.20030502
- 11 Banerjee R, Bhattacharjee S, Varadwaj PK. Analyses and Forecast for COVID-19 epidemic in India. *medRxiv* 2020;:2020.06.26.20141077. doi:10.1101/2020.06.26.20141077
- 12 Lauer SA, Grantz KH, Bi Q, *et al.* The Incubation Period of Coronavirus Disease 2019 (COVID-19) From Publicly Reported Confirmed Cases: Estimation and Application. *Ann*

- 1  
2  
3 *Intern Med* 2020;**172**:577–82. doi:10.7326/M20-0504  
4  
5  
6 13 Liu T, Hu J, Xiao J, *et al*. Time-varying transmission dynamics of Novel Coronavirus  
7 Pneumonia in China. *Systems Biology* 2020.  
8  
9 14 National Institute for Communicable Diseases. Covid-19 Sentinel Hospital Surveillance  
10 Update. 2020.  
11  
12 15 Weiss P, Murdoch DR. Clinical course and mortality risk of severe COVID-19. *Lancet*  
13 2020;**395**:1014–5. doi:10.1016/S0140-6736(20)30633-4  
14  
15 16 Davies M-A. HIV and risk of COVID-19 death: a population cohort study from the  
16 Western Cape Province, South Africa. *medRxiv*;:1–21.  
17  
18  
19  
20  
21  
22  
23  
24  
25  
26  
27  
28  
29  
30  
31  
32  
33  
34  
35  
36  
37  
38  
39  
40  
41  
42  
43  
44  
45  
46  
47  
48  
49  
50  
51  
52  
53  
54  
55  
56  
57  
58  
59  
60

### Supplementary Appendix Initial Cases, Lockdown dates and Sources

| Country                  | Date_20_plus | InitialCaseNo | start_lockdown | end_lockdown | lockdown_duration | source      |
|--------------------------|--------------|---------------|----------------|--------------|-------------------|-------------|
| Algeria                  | 3/9/20       | 20            | 3/23/20        | 6/13/20      | 82                | 1,2         |
| Angola                   | 4/18/20      | 24            | 3/31/20        | 6/9/20       | 70                | 3,4         |
| Benin                    | 4/5/20       | 22            | 3/30/20        | 5/10/20      | 41                | 5           |
| Botswana                 | 4/19/20      | 20            | 4/6/20         | 5/22/20      | 46                | 6           |
| Burkina Faso             | 3/18/20      | 20            | 3/21/20        | 5/14/20      | 54                | 7           |
| Burundi                  | 5/17/20      | 23            | 3/21/20        | 4/29/20      | 39                | 8,9         |
| Cabo Verde               | 4/15/20      | 56            | 3/28/20        | 4/14/20      | 17                | 10          |
| Cameroon                 | 3/20/20      | 20            | 3/18/20        | 5/1/20       | 44                | 11,12       |
| Central African Republic | 4/28/20      | 50            | 3/30/20        | NA           | 60                | 13          |
| Chad                     | 4/13/20      | 23            | 4/2/20         | 5/15/20      | 43                | 14          |
| Congo (Brazzaville)      | 4/2/20       | 22            | 3/31/20        | 5/31/20      | 61                | 15,16       |
| Congo (Kinshasa)         | 3/21/20      | 23            | 3/18/20        | 6/4/20       | 78                | 17,18,19,20 |
| Cote d'Ivoire            | 3/23/20      | 25            | 3/16/20        | 5/17/20      | 62                | 21,22       |
| Djibouti                 | 3/31/20      | 30            | 3/23/20        | 5/8/20       | 46                | 23          |
| Egypt                    | 3/8/20       | 49            | 3/15/20        | 7/30/20      | 137               | 24,25,26    |
| Equatorial Guinea        | 4/12/20      | 21            | 3/26/20        | 5/29/20      | 64                | 27,28       |
| Eritrea                  | 4/2/20       | 22            | 3/23/20        | 4/23/20      | 31                | 29          |
| Eswatini                 | 4/18/20      | 22            | 3/26/20        | 5/7/20       | 42                | 30          |
| Ethiopia                 | 3/29/20      | 21            | 3/22/20        | 9/8/20       | 170               | 31,32       |
| Gabon                    | 4/2/20       | 21            | 3/20/20        | 5/17/20      | 58                | 33          |
| Gambia                   | 5/11/20      | 22            | 3/17/20        | 5/15/20      | 59                | 34          |
| Ghana                    | 3/22/20      | 23            | 3/17/20        | 4/20/20      | 34                | 35,36       |
| Guinea                   | 3/30/20      | 22            | 3/26/20        | 5/15/20      | 50                | 37,38       |
| Guinea-Bissau            | 4/7/20       | 33            | 3/17/20        | 5/11/20      | 55                | 39          |
| Kenya                    | 3/24/20      | 25            | 3/15/20        | 4/27/20      | 43                | 40,41,42    |
| Liberia                  | 4/8/20       | 31            | 3/22/20        | 5/7/20       | 21                | 43,44       |
| Libya                    | 4/7/20       | 20            | 4/17/20        | 5/7/20       | 20                | 45          |
| Madagascar               | 3/26/20      | 23            | 3/23/20        | NA           | 60                | 46          |
| Malawi                   | 4/22/20      | 23            | 3/23/20        | 5/10/20      | 48                | 47,48       |
| Mali                     | 3/30/20      | 25            | 3/15/20        | 5/9/20       | 55                | 49          |
| Mauritania               | 5/14/20      | 20            | 3/15/20        | NA           | 60                | 50          |
| Mauritius                | 3/22/20      | 28            | 3/29/20        | 6/1/20       | 64                | 51          |
| Morocco                  | 3/15/20      | 28            | 3/15/20        | 6/10/20      | 87                | 52,53,54    |
| Mozambique               | 4/10/20      | 20            | 3/23/20        | 5/30/20      | 68                | 55,56,57    |
| Namibia                  | 5/23/20      | 20            | 3/17/20        | 6/1/20       | 76                | 58          |
| Niger                    | 3/30/20      | 27            | 3/20/20        | 7/11/20      | 113               | 59          |
| Nigeria                  | 3/21/20      | 22            | 3/30/20        | 6/1/20       | 63                | 60,61       |
| Rwanda                   | 3/23/20      | 36            | 3/21/20        | NA           | 60                | 62          |
| Sao Tome and Principe    | 5/5/20       | 174           | 3/17/20        | NA           | 60                | 63          |
| Senegal                  | 3/15/20      | 24            | 3/14/20        | 5/30/20      | 77                | 64,65       |
| Seychelles               | 4/6/20       | 11            | 3/16/20        | NA           | 60                | 66          |

|    |              |         |    |         |         |    |          |
|----|--------------|---------|----|---------|---------|----|----------|
| 1  |              |         |    |         |         |    |          |
| 2  |              |         |    |         |         |    |          |
| 3  | Sierra Leone | 4/17/20 | 26 | 4/4/20  |         | 60 | 67       |
| 4  | Somalia      | 4/10/20 | 21 | 3/18/20 | NA      | 60 | 68       |
| 5  | South Africa | 3/13/20 | 24 | 3/27/20 | 5/1/20  | 35 | 69,70    |
| 6  | South Sudan  | 4/28/20 | 34 | 3/25/20 | NA      | 60 | 71       |
| 7  | Sudan        | 4/13/20 | 29 | 3/15/20 | 6/3/20  | 80 | 72,73,74 |
| 8  | Tanzania     | 4/1/20  | 20 | 3/23/20 | NA      | 60 | 75,76,77 |
| 9  | Togo         | 3/24/20 | 20 | 3/20/20 | NA      | 60 | 78       |
| 10 | Tunisia      | 3/16/20 | 20 | 3/12/20 | 5/4/20  | 53 | 79,80,81 |
| 11 | Uganda       | 3/27/20 | 23 | 3/18/20 | 5/4/20  | 47 | 82,12    |
| 12 | Zambia       | 3/27/20 | 22 | 3/17/20 | 4/24/20 | 38 | 83,12    |
| 13 | Zimbabwe     | 4/15/20 | 23 | 3/23/20 | NA      | 60 | 84,12    |
| 14 |              |         |    |         |         |    |          |
| 15 |              |         |    |         |         |    |          |
| 16 |              |         |    |         |         |    |          |
| 17 |              |         |    |         |         |    |          |
| 18 |              |         |    |         |         |    |          |
| 19 |              |         |    |         |         |    |          |
| 20 |              |         |    |         |         |    |          |
| 21 |              |         |    |         |         |    |          |
| 22 |              |         |    |         |         |    |          |
| 23 |              |         |    |         |         |    |          |
| 24 |              |         |    |         |         |    |          |
| 25 |              |         |    |         |         |    |          |
| 26 |              |         |    |         |         |    |          |
| 27 |              |         |    |         |         |    |          |
| 28 |              |         |    |         |         |    |          |
| 29 |              |         |    |         |         |    |          |
| 30 |              |         |    |         |         |    |          |
| 31 |              |         |    |         |         |    |          |
| 32 |              |         |    |         |         |    |          |
| 33 |              |         |    |         |         |    |          |
| 34 |              |         |    |         |         |    |          |
| 35 |              |         |    |         |         |    |          |
| 36 |              |         |    |         |         |    |          |
| 37 |              |         |    |         |         |    |          |
| 38 |              |         |    |         |         |    |          |
| 39 |              |         |    |         |         |    |          |
| 40 |              |         |    |         |         |    |          |
| 41 |              |         |    |         |         |    |          |
| 42 |              |         |    |         |         |    |          |
| 43 |              |         |    |         |         |    |          |
| 44 |              |         |    |         |         |    |          |
| 45 |              |         |    |         |         |    |          |
| 46 |              |         |    |         |         |    |          |
| 47 |              |         |    |         |         |    |          |
| 48 |              |         |    |         |         |    |          |
| 49 |              |         |    |         |         |    |          |
| 50 |              |         |    |         |         |    |          |
| 51 |              |         |    |         |         |    |          |
| 52 |              |         |    |         |         |    |          |
| 53 |              |         |    |         |         |    |          |
| 54 |              |         |    |         |         |    |          |
| 55 |              |         |    |         |         |    |          |
| 56 |              |         |    |         |         |    |          |
| 57 |              |         |    |         |         |    |          |
| 58 |              |         |    |         |         |    |          |
| 59 |              |         |    |         |         |    |          |
| 60 |              |         |    |         |         |    |          |

## Sources

1. <https://www.africanews.com/2020/04/28/algeria-extends-lockdown-measures-until-may-14//>
2. <https://www.africanews.com/2020/05/29/algeria-extends-virus-lockdown-until-june-13//>
3. <https://www.imf.org/en/Topics/imf-and-covid19/Policy-Responses-to-COVID-19>
4. US Embassy update
5. <https://reliefweb.int/report/benin/benin-coronavirus-covid-19-situation-report-no-7>
6. <https://www.imf.org/en/Topics/imf-and-covid19/Policy-Responses-to-COVID-19>
7. <https://www.garda.com/crisis24/news-alerts/334916/burkina-faso-curfew-hours-modified-as-of-april-20-update-6>
8. <https://www.hrw.org/news/2020/03/31/burundi-any-covid-19-cover-will-put-lives-risk>
9. <https://bi.usembassy.gov/covid-19-information/>
10. <https://cv.usembassy.gov/covid-19-information/>
11. <https://home.kpmg/xx/en/home/insights/2020/04/cameroon-government-and-institution-measures-in-response-to-covid.html>
12. <https://preventepidemics.org/covid19/perc/>
13. <https://www.gov.uk/foreign-travel-advice/central-african-republic/coronavirus>
14. <https://www.imf.org/en/Topics/imf-and-covid19/Policy-Responses-to-COVID-19>
15. <https://www.imf.org/en/Topics/imf-and-covid19/Policy-Responses-to-COVID-19>
16. U.S. Embassy Kinshasa, Democratic Republic of the Congo (May 12, 2020)
17. <https://africanbusinessmagazine.com/sectors/health-sectors/covid-19/fighting-covid-19-in-the-democratic-republic-of-congo/>
18. US Embassy update
19. <https://preventepidemics.org/covid19/perc/>
20. <https://www.aa.com.tr/en/africa/dr-congo-extends-state-of-emergency-amid-covid-19/1816681>
21. <https://preventepidemics.org/covid19/perc/>
22. <https://ci.usembassy.gov/covid-19-information/>
23. <https://www.aa.com.tr/en/africa/egypt-extends-state-of-emergency-for-3-months/1821088>
24. <https://dj.usembassy.gov/health-alert-u-s-embassy-djibouti-3/>
25. <https://preventepidemics.org/covid19/perc/>
26. <https://eg.usembassy.gov/health-alert-u-s-embassy-cairo-march-24-2020/>
27. <https://www.guineaecuatorialpress.com/noticia.php?id=15516>
28. <https://home.kpmg/xx/en/home/insights/2020/04/equatorial-guinea-government-and-institution-measures-in-response-to-covid.html>
29. <https://er.usembassy.gov/health-alert/>
30. <https://www.garda.com/crisis24/news-alerts/332881/eswatini-government-extends-partial-lockdown-until-may-7-due-to-covid-19-update-2>
31. <https://www.aljazeera.com/news/2020/04/ethiopia-declares-state-emergency-fight-covid-19-200408142519485.html>
32. <https://preventepidemics.org/covid19/perc/>
33. <https://ga.usembassy.gov/u-s-citizen-services/coronavirus-update/>
34. <https://www.garda.com/crisis24/news-alerts/324046/gambia-authorities-confirm-first-case-of-covid-19-march-17>
35. <https://www.imf.org/en/Topics/imf-and-covid19/Policy-Responses-to-COVID-19>
36. <https://preventepidemics.org/covid19/perc/>
37. <https://gn.usembassy.gov/u-s-citizen-services/covid-19-information/>
38. <https://preventepidemics.org/covid19/perc/>
39. <https://www.imf.org/en/Topics/imf-and-covid19/Policy-Responses-to-COVID-19>
40. [https://en.wikipedia.org/wiki/COVID-19\\_pandemic\\_in\\_Kenya#cite\\_note-37](https://en.wikipedia.org/wiki/COVID-19_pandemic_in_Kenya#cite_note-37)
41. US Embassy update
42. <https://www.guineaecuatorialpress.com/noticia.php?id=15516>
43. [https://en.wikipedia.org/wiki/COVID-19\\_pandemic\\_in\\_Liberia](https://en.wikipedia.org/wiki/COVID-19_pandemic_in_Liberia)
44. <https://preventepidemics.org/covid19/perc/>

- 1
- 2
- 3
45. <https://www.libyaobserver.ly/news/pc-extends-curfew-reduces-restricted-hours>
46. <https://mg.usembassy.gov/u-s-citizen-services/security-and-travel-information/covid-19-information/>
47. <https://www.aljazeera.com/news/2020/04/malawi-workers-relieved-court-blocks-covid-19-lockdown-plan-200420092511551.html>
48. [https://en.wikipedia.org/wiki/COVID-19\\_pandemic\\_in\\_Malawi](https://en.wikipedia.org/wiki/COVID-19_pandemic_in_Malawi)
49. <https://www.imf.org/en/Topics/imf-and-covid19/Policy-Responses-to-COVID-19>
50. <https://reliefweb.int/report/mauritania/wfp-mauritania-country-brief-march-2020>
51. <https://www.imf.org/en/Topics/imf-and-covid19/Policy-Responses-to-COVID-19>
52. <https://www.middleeastmonitor.com/20200419-moroccos-government-extends-coronavirus-lockdown-to-may-20/>
53. US Embassy update
54. <https://preventepidemics.org/covid19/perc/>
55. <https://mz.usembassy.gov/covid-19-information-2/>
56. <https://preventepidemics.org/covid19/perc/>
57. <https://covid19.ins.gov.mz/wp-content/uploads/2020/05/Boletim-Diario-Covid-N48.pdf>
58. <https://www.garda.com/crisis24/news-alert-full-history/EYN7SZavvRSKXPbHT/namibia-government-closes-schools-and-suspends-flights-between-qatar-ethiopia-and-germany-march-15>
59. <https://ne.usembassy.gov/u-s-citizen-services/covid-19-information/>
60. <https://www.aljazeera.com/news/2020/04/nigeria-extends-coronavirus-lockdown-key-cities-weeks-200413185335045.html>
61. <https://preventepidemics.org/covid19/perc/>
62. <https://www.ktpress.rw/2020/04/11-more-days-rwanda-extends-covid-19-lockdown-to-april-30/>
63. <https://ga.usembassy.gov/u-s-citizen-services/coronavirus-update/>
64. <https://sn.usembassy.gov/covid-19-information/>
65. <https://preventepidemics.org/covid19/perc/>
66. <http://www.seychellesnewsagency.com/articles/12688/Seychelles+and+COVID-++measures+taken+by+the+island+nation+to+protect+its+people>
67. <https://www.imf.org/en/Topics/imf-and-covid19/Policy-Responses-to-COVID-19>
68. <https://www.osac.gov/Country/Somalia/Content/Detail/Report/6062d8e6-3dbb-4abd-8e14-183ac940cf81>
69. <https://blogs.loc.gov/law/2020/04/south-africa-government-measures-to-contain-the-spread-of-covid-19-and-mitigate-damages/>
70. <https://preventepidemics.org/covid19/perc/>
71. <https://www.osac.gov/Country/SouthSudan/Content/Detail/Report/10c44b03-fdf8-4249-856a-1848aca55939>
72. <https://www.cmi.no/news/2441-covid-19-and-the-challenges-of-social-distancing-in-khartoum>
73. US Embassy update
74. <https://preventepidemics.org/covid19/perc/>
75. <https://www.africanews.com/2020/04/05/coronavirus-tanzania-tighter-covid-19-vigilance/>
76. <https://www.dw.com/en/tanzania-under-fire-from-who-for-lackluster-response-to-covid-19-pandemic/a-53304699>
77. <https://preventepidemics.org/covid19/perc/>
78. [https://en.wikipedia.org/wiki/COVID-19\\_pandemic\\_in\\_Togo](https://en.wikipedia.org/wiki/COVID-19_pandemic_in_Togo)
79. <https://english.alarabiya.net/en/coronavirus/2020/04/20/Coronavirus-Tunisia-extends-lockdown-looks-to-gradually-ease-restrictions>
80. <https://preventepidemics.org/covid19/perc/>
81. <https://www.garda.com/crisis24/news-alerts/334106/tunisia-ongoing-covid-19-lockdown-extended-until-may-3-update-7>
82. <https://www.theeastafrican.co.ke/news/ea/Uganda-to-relax-Covid19-lockdown/4552908-5537526-xoh407/index.html>
83. [https://en.wikipedia.org/wiki/COVID-19\\_pandemic\\_in\\_Zambia](https://en.wikipedia.org/wiki/COVID-19_pandemic_in_Zambia)
84. [https://en.wikipedia.org/wiki/COVID-19\\_pandemic\\_in\\_Zimbabwe](https://en.wikipedia.org/wiki/COVID-19_pandemic_in_Zimbabwe)



**Supplementary Appendix Parameters by age only**

| CountryName              | hosp_rate   | hosp_rate_UB | hosp_rate_LB |
|--------------------------|-------------|--------------|--------------|
| Angola                   | 0.20575232  | 0.24180141   | 0.169683142  |
| Benin                    | 0.207539628 | 0.244104981  | 0.170945069  |
| Botswana                 | 0.209078609 | 0.246019337  | 0.17209894   |
| Burkina Faso             | 0.206022975 | 0.242120179  | 0.169903482  |
| Burundi                  | 0.205822653 | 0.241901247  | 0.169723863  |
| Cabo Verde               | 0.210261266 | 0.247813329  | 0.172671586  |
| Cameroon                 | 0.206608871 | 0.242891552  | 0.170301355  |
| Central African Republic | 0.206743817 | 0.243048818  | 0.170412838  |
| Congo (Brazzaville)      | 0.206606175 | 0.242928949  | 0.170259694  |
| Congo (Kinshasa)         | 0.207026747 | 0.243388486  | 0.170636906  |
| Cote d'Ivoire            | 0.206839964 | 0.243193023  | 0.170460991  |
| Djibouti                 | 0.209763985 | 0.246986986  | 0.172500846  |
| Egypt                    | 0.210968491 | 0.248536556  | 0.173354066  |
| Eritrea                  | 0.208725001 | 0.245625144  | 0.1717894    |
| Equatorial Guinea        | 0.206163714 | 0.242329163  | 0.169976012  |
| Eswatini                 | 0.20868778  | 0.245499907  | 0.171838277  |
| Ethiopia                 | 0.208066795 | 0.244836777  | 0.171266347  |
| Gambia                   | 0.206386242 | 0.242613311  | 0.170135712  |
| Ghana                    | 0.207187505 | 0.243633541  | 0.17071358   |
| Greece                   | 0.243184847 | 0.292094165  | 0.194120367  |
| Guinea                   | 0.206936577 | 0.243307671  | 0.170538807  |
| Guinea-Bissau            | 0.206697271 | 0.242966457  | 0.170401735  |
| Kenya                    | 0.205931114 | 0.242014768  | 0.169825994  |
| Liberia                  | 0.207544856 | 0.244114595  | 0.170945964  |
| Libya                    | 0.209669736 | 0.246937985  | 0.172363806  |
| Madagascar               | 0.207171292 | 0.243677881  | 0.170638676  |
| Malawi                   | 0.206432223 | 0.242646782  | 0.170193264  |
| Maldives                 | 0.208640744 | 0.245693829  | 0.171557465  |
| Mali                     | 0.20625116  | 0.242443117  | 0.170036536  |
| Mauritania               | 0.207348793 | 0.243860589  | 0.170808808  |
| Mauritius                | 0.221841386 | 0.262608797  | 0.180973756  |
| Morocco                  | 0.214135401 | 0.252667293  | 0.175542333  |
| Mozambique               | 0.206843839 | 0.243171506  | 0.170489514  |
| Namibia                  | 0.208227277 | 0.245006174  | 0.171416075  |
| Niger                    | 0.206347149 | 0.242538082  | 0.170132277  |
| Nigeria                  | 0.206589003 | 0.242839025  | 0.170313513  |
| Rwanda                   | 0.20698375  | 0.243382098  | 0.170558857  |
| Sao Tome and Principe    | 0.207038312 | 0.243492027  | 0.170558854  |
| Senegal                  | 0.207257688 | 0.243744438  | 0.170743248  |
| Seychelles               | 0.215189603 | 0.254053027  | 0.176260364  |
| Sierra Leone             | 0.207020638 | 0.243423407  | 0.170590965  |

|    |              |             |             |             |
|----|--------------|-------------|-------------|-------------|
| 1  |              |             |             |             |
| 2  |              |             |             |             |
| 3  | Somalia      | 0.206882422 | 0.243256952 | 0.170482012 |
| 4  | South Africa | 0.210965888 | 0.248452757 | 0.173430478 |
| 5  | South Sudan  | 0.20783077  | 0.244501808 | 0.171129631 |
| 6  | Sudan        | 0.208176285 | 0.244963113 | 0.171358029 |
| 7  | Syria        | 0.209918855 | 0.247289083 | 0.172510496 |
| 8  | Tanzania     | 0.206351373 | 0.242540083 | 0.170138607 |
| 9  | Togo         | 0.206822132 | 0.243151327 | 0.170466602 |
| 10 | Tunisia      | 0.216796979 | 0.256314451 | 0.177210668 |
| 11 | Uganda       | 0.205235195 | 0.241112756 | 0.16933958  |
| 12 | Zambia       | 0.205508643 | 0.241465189 | 0.169532648 |
| 13 | Zimbabwe     | 0.206943313 | 0.243307754 | 0.170551927 |
| 14 |              |             |             |             |
| 15 |              |             |             |             |
| 16 |              |             |             |             |
| 17 |              |             |             |             |
| 18 |              |             |             |             |
| 19 |              |             |             |             |
| 20 |              |             |             |             |
| 21 |              |             |             |             |
| 22 |              |             |             |             |
| 23 |              |             |             |             |
| 24 |              |             |             |             |
| 25 |              |             |             |             |
| 26 |              |             |             |             |
| 27 |              |             |             |             |
| 28 |              |             |             |             |
| 29 |              |             |             |             |
| 30 |              |             |             |             |
| 31 |              |             |             |             |
| 32 |              |             |             |             |
| 33 |              |             |             |             |
| 34 |              |             |             |             |
| 35 |              |             |             |             |
| 36 |              |             |             |             |
| 37 |              |             |             |             |
| 38 |              |             |             |             |
| 39 |              |             |             |             |
| 40 |              |             |             |             |
| 41 |              |             |             |             |
| 42 |              |             |             |             |
| 43 |              |             |             |             |
| 44 |              |             |             |             |
| 45 |              |             |             |             |
| 46 |              |             |             |             |
| 47 |              |             |             |             |
| 48 |              |             |             |             |
| 49 |              |             |             |             |
| 50 |              |             |             |             |
| 51 |              |             |             |             |
| 52 |              |             |             |             |
| 53 |              |             |             |             |
| 54 |              |             |             |             |
| 55 |              |             |             |             |
| 56 |              |             |             |             |
| 57 |              |             |             |             |
| 58 |              |             |             |             |
| 59 |              |             |             |             |
| 60 |              |             |             |             |

**Supplementary Appendix Parameters by age and TB/HIV prevalence**

| CountryName              | hosp_rate   | hosp_rate_UB | hosp_rate_LB |
|--------------------------|-------------|--------------|--------------|
| Angola                   | 0.208508855 | 0.245493069  | 0.170343906  |
| Benin                    | 0.209142326 | 0.246251377  | 0.171329249  |
| Botswana                 | 0.246200701 | 0.295734696  | 0.180997409  |
| Burkina Faso             | 0.207377495 | 0.243934205  | 0.170228172  |
| Burundi                  | 0.20844609  | 0.245414656  | 0.170352722  |
| Cabo Verde               | 0.212463238 | 0.250762297  | 0.173199417  |
| Cameroon                 | 0.211777752 | 0.249813921  | 0.171540378  |
| Central African Republic | 0.212172565 | 0.250319211  | 0.171714153  |
| Chad                     | 0.208560111 | 0.245552133  | 0.170567325  |
| Congo (Brazzaville)      | 0.211552775 | 0.24955363   | 0.171445435  |
| Congo (Kinshasa)         | 0.208584859 | 0.24547517   | 0.171010399  |
| Cote d'Ivoire            | 0.211986846 | 0.250085928  | 0.171694741  |
| Djibouti                 | 0.212563879 | 0.250736713  | 0.173172004  |
| Egypt                    | 0.211002928 | 0.248582675  | 0.173362321  |
| Equatorial Guinea        | 0.214111991 | 0.252973806  | 0.171881279  |
| Eritrea                  | 0.210295199 | 0.247728013  | 0.172165789  |
| Eswatini                 | 0.250773758 | 0.301863097  | 0.18192663   |
| Ethiopia                 | 0.209850712 | 0.247225869  | 0.171693967  |
| Gabon                    | 0.213603152 | 0.252206128  | 0.172647257  |
| Gambia                   | 0.209136276 | 0.246296264  | 0.170794917  |
| Ghana                    | 0.209958295 | 0.247344291  | 0.171377761  |
| Guinea                   | 0.209240862 | 0.246393659  | 0.171091163  |
| Guinea-Bissau            | 0.21152442  | 0.249431163  | 0.171558842  |
| Kenya                    | 0.214884247 | 0.254005155  | 0.171972133  |
| Liberia                  | 0.209466443 | 0.246688059  | 0.171406584  |
| Libya                    | 0.209739267 | 0.247031104  | 0.172380473  |
| Madagascar               | 0.207801636 | 0.244522062  | 0.170789774  |
| Malawi                   | 0.220815851 | 0.2619099    | 0.173641137  |
| Mali                     | 0.207835645 | 0.244565121  | 0.17041635   |
| Mauritania               | 0.207555803 | 0.244137825  | 0.17085843   |
| Morocco                  | 0.214338659 | 0.252939504  | 0.175591056  |
| Mozambique               | 0.223662407 | 0.265695591  | 0.174521063  |
| Namibia                  | 0.230228323 | 0.274470837  | 0.176689906  |
| Niger                    | 0.207013969 | 0.243431112  | 0.170292119  |
| Nigeria                  | 0.210851441 | 0.248547448  | 0.171335255  |
| Rwanda                   | 0.211348422 | 0.249227437  | 0.171605104  |
| Sao Tome and Principe    | 0.207239366 | 0.243761287  | 0.170607048  |
| Senegal                  | 0.208313481 | 0.245158397  | 0.17099633   |
| Sierra Leone             | 0.208967992 | 0.246031381  | 0.171057761  |
| Somalia                  | 0.207585301 | 0.244198275  | 0.170650497  |
| South Africa             | 0.239390705 | 0.286520386  | 0.180244139  |

|    |             |             |             |             |
|----|-------------|-------------|-------------|-------------|
| 1  |             |             |             |             |
| 2  |             |             |             |             |
| 3  | South Sudan | 0.20980823  | 0.2471501   | 0.171603644 |
| 4  | Sudan       | 0.208749758 | 0.245731131 | 0.171495495 |
| 5  | Tanzania    | 0.212393073 | 0.250631364 | 0.171586852 |
| 6  | Togo        | 0.210343647 | 0.247867478 | 0.171310738 |
| 7  | Tunisia     | 0.216896765 | 0.256448089 | 0.177234587 |
| 8  | Uganda      | 0.213594749 | 0.252308197 | 0.171343433 |
| 9  | Zambia      | 0.221890247 | 0.263404074 | 0.173459452 |
| 10 | Zimbabwe    | 0.227944676 | 0.271433602 | 0.175586126 |
| 11 |             |             |             |             |
| 12 |             |             |             |             |
| 13 |             |             |             |             |
| 14 |             |             |             |             |
| 15 |             |             |             |             |
| 16 |             |             |             |             |
| 17 |             |             |             |             |
| 18 |             |             |             |             |
| 19 |             |             |             |             |
| 20 |             |             |             |             |
| 21 |             |             |             |             |
| 22 |             |             |             |             |
| 23 |             |             |             |             |
| 24 |             |             |             |             |
| 25 |             |             |             |             |
| 26 |             |             |             |             |
| 27 |             |             |             |             |
| 28 |             |             |             |             |
| 29 |             |             |             |             |
| 30 |             |             |             |             |
| 31 |             |             |             |             |
| 32 |             |             |             |             |
| 33 |             |             |             |             |
| 34 |             |             |             |             |
| 35 |             |             |             |             |
| 36 |             |             |             |             |
| 37 |             |             |             |             |
| 38 |             |             |             |             |
| 39 |             |             |             |             |
| 40 |             |             |             |             |
| 41 |             |             |             |             |
| 42 |             |             |             |             |
| 43 |             |             |             |             |
| 44 |             |             |             |             |
| 45 |             |             |             |             |
| 46 |             |             |             |             |
| 47 |             |             |             |             |
| 48 |             |             |             |             |
| 49 |             |             |             |             |
| 50 |             |             |             |             |
| 51 |             |             |             |             |
| 52 |             |             |             |             |
| 53 |             |             |             |             |
| 54 |             |             |             |             |
| 55 |             |             |             |             |
| 56 |             |             |             |             |
| 57 |             |             |             |             |
| 58 |             |             |             |             |
| 59 |             |             |             |             |
| 60 |             |             |             |             |

# BMJ Open

## Modeling COVID-19 Transmission in Africa: Country-wise Projections of Total and Severe Infections Under Different Lockdown Scenarios

|                                 |                                                                                                                                                                                                                                                                                                                                                                                                                                                                                                                                                                                                                                                                                                                                                                                                                                                            |
|---------------------------------|------------------------------------------------------------------------------------------------------------------------------------------------------------------------------------------------------------------------------------------------------------------------------------------------------------------------------------------------------------------------------------------------------------------------------------------------------------------------------------------------------------------------------------------------------------------------------------------------------------------------------------------------------------------------------------------------------------------------------------------------------------------------------------------------------------------------------------------------------------|
| Journal:                        | <i>BMJ Open</i>                                                                                                                                                                                                                                                                                                                                                                                                                                                                                                                                                                                                                                                                                                                                                                                                                                            |
| Manuscript ID                   | bmjopen-2020-044149.R1                                                                                                                                                                                                                                                                                                                                                                                                                                                                                                                                                                                                                                                                                                                                                                                                                                     |
| Article Type:                   | Original research                                                                                                                                                                                                                                                                                                                                                                                                                                                                                                                                                                                                                                                                                                                                                                                                                                          |
| Date Submitted by the Author:   | 18-Jan-2021                                                                                                                                                                                                                                                                                                                                                                                                                                                                                                                                                                                                                                                                                                                                                                                                                                                |
| Complete List of Authors:       | Frost, Isabel; Center for Disease Dynamics Economics and Policy, ; Imperial College Faculty of Medicine - Hammersmith Campus, Craig, Jessica; Center for Disease Dynamics Economics and Policy Osen, Gilbert; Center for Disease Dynamics Economics and Policy Hauck, Stephanie; Center for Disease Dynamics Economics and Policy Kalanxhi, Erta; Center for Disease Dynamics Economics and Policy Schueller, Emily; Center for Disease Dynamics Economics and Policy Gatalo, Oliver; Center for Disease Dynamics Economics and Policy Yang, Yupeng; Center for Disease Dynamics Economics and Policy Tseng, Katie; Center for Disease Dynamics Economics and Policy, Lin, Gary; Johns Hopkins University, Department of Emergency Medicine, School of Medicine<br>Klein, Eili; Johns Hopkins University; Center for Disease Dynamics Economics and Policy |
| <b>Primary Subject Heading</b>: | Epidemiology                                                                                                                                                                                                                                                                                                                                                                                                                                                                                                                                                                                                                                                                                                                                                                                                                                               |
| Secondary Subject Heading:      | Global health, Infectious diseases, Public health, Respiratory medicine                                                                                                                                                                                                                                                                                                                                                                                                                                                                                                                                                                                                                                                                                                                                                                                    |
| Keywords:                       | Epidemiology < TROPICAL MEDICINE, Public health < INFECTIOUS DISEASES, Respiratory infections < THORACIC MEDICINE                                                                                                                                                                                                                                                                                                                                                                                                                                                                                                                                                                                                                                                                                                                                          |
|                                 |                                                                                                                                                                                                                                                                                                                                                                                                                                                                                                                                                                                                                                                                                                                                                                                                                                                            |

SCHOLARONE™  
Manuscripts



I, the Submitting Author has the right to grant and does grant on behalf of all authors of the Work (as defined in the below author licence), an exclusive licence and/or a non-exclusive licence for contributions from authors who are: i) UK Crown employees; ii) where BMJ has agreed a CC-BY licence shall apply, and/or iii) in accordance with the terms applicable for US Federal Government officers or employees acting as part of their official duties; on a worldwide, perpetual, irrevocable, royalty-free basis to BMJ Publishing Group Ltd ("BMJ") its licensees and where the relevant Journal is co-owned by BMJ to the co-owners of the Journal, to publish the Work in this journal and any other BMJ products and to exploit all rights, as set out in our [licence](#).

The Submitting Author accepts and understands that any supply made under these terms is made by BMJ to the Submitting Author unless you are acting as an employee on behalf of your employer or a postgraduate student of an affiliated institution which is paying any applicable article publishing charge ("APC") for Open Access articles. Where the Submitting Author wishes to make the Work available on an Open Access basis (and intends to pay the relevant APC), the terms of reuse of such Open Access shall be governed by a Creative Commons licence – details of these licences and which [Creative Commons](#) licence will apply to this Work are set out in our licence referred to above.

Other than as permitted in any relevant BMJ Author's Self Archiving Policies, I confirm this Work has not been accepted for publication elsewhere, is not being considered for publication elsewhere and does not duplicate material already published. I confirm all authors consent to publication of this Work and authorise the granting of this licence.

## Modeling COVID-19 Transmission in Africa: Country-wise Projections of Total and Severe Infections Under Different Lockdown Scenarios

Isabel Frost, DPhil<sup>1,2,3</sup>, Jessica Craig, MPH<sup>1</sup>, Gilbert Osen, MSc<sup>1</sup>, Stephanie Hauck, PhD<sup>1</sup>, Erta Kalanxhi, PhD<sup>1</sup>, Emily Schueller, MA<sup>1</sup>, Oliver Gatalo, MPH<sup>1</sup>, Yupeng Yang, MS<sup>1</sup>, Katie Tseng, MPH<sup>1</sup>, Gary Lin, PhD<sup>4</sup>, Eili Klein, PhD<sup>1,4</sup>

1. Center for Disease Dynamics Economics & Policy, Inc (CDDEP), Silver Spring, MD, USA
2. Imperial College London, London, UK
3. Amity University, Noida, India
4. Department of Emergency Medicine, School of Medicine, Johns Hopkins University, Baltimore, MD, USA

**Corresponding author:** Isabel Frost, [frost.isabel@gmail.com](mailto:frost.isabel@gmail.com), Center for Disease Dynamics Economics & Policy, Inc (CDDEP), Silver Spring, MD, USA

**Word count: 3864 words**

## ABSTRACT

### *Objectives*

As of 13<sup>th</sup> January 2021, there have been 3,113,963 confirmed cases of SARS-CoV-2 and 74,619 deaths across the African continent. Despite relatively lower numbers of cases initially, many African countries are now experiencing an exponential increase in case numbers. Estimates of the progression of disease and potential impact of different interventions are needed to inform policy making decisions. Herein, we model the possible trajectory of SARS-CoV-2 in 52 African countries under different intervention scenarios.

### *Design*

We developed a compartmental model of SARS-CoV-2 transmission to estimate the COVID-19 case burden for all African countries while considering four scenarios: no intervention, moderate lockdown, hard lockdown, and hard lockdown with continued restrictions once lockdown is lifted. We further analyzed the potential impact of COVID-19 on vulnerable populations affected by HIV/AIDS and TB.

### *Results*

In the absence of an intervention, the most populous countries had the highest peaks in active projected number of infections with Nigeria having an estimated 645,081 severe infections. The scenario with a hard lockdown and continued post-lockdown interventions to reduce transmission was the most efficacious strategy for delaying the time to the peak and reducing the number of cases. In South Africa projected peak severe infections increase from 162,977 to 203,261, when vulnerable populations with HIV/AIDS and TB are included in the analysis.

### *Conclusion*

The COVID-19 pandemic is rapidly spreading across the African continent. Estimates of the potential impact of interventions and burden of disease are essential for policy makers to make evidence-based decisions on the distribution of limited resources and to balance the economic costs of interventions with the potential for saving lives.



## ARTICLE SUMMARY

### *Strengths and limitations of this study*

- Though the rapid spread of SARS-CoV-2 through China, Europe and the United States has been well-studied, leading to a detailed understanding of its biology and epidemiology, the population and resources for combatting the spread of the disease in Africa greatly differ to those areas and require models specific to this context.
- Few models that provide estimates for policymakers, donors, and aid organizations focused on Africa to plan an effective response to the pandemic threat that optimizes the use of limited resources.
- This is a compartmental model and as such has inherent weaknesses; including the possible overestimation of the number of infections as it is assumed people are well mixed, despite many social, physical and geographical barriers to mixing within countries.
- Peaks in transmission are likely to occur at different times in different regions, with multiple epicenters.
- This model is not stochastic and case data are modeled from the first twenty or more cases, each behaving as an average case; in reality, there are no average cases; some individuals are likely to have many contacts, causing multiple infections, and others to have very few.

### **FUNDING**

This work was supported by Centers for Disease Control and Prevention Modeling in Infectious Disease (MInD) in Healthcare Network (Grant Number 1U01CK000536).

### **COMPETING INTERESTS**

The authors have no competing interests to declare.

## INTRODUCTION

On March 11, 2020, the World Health Organization declared the novel severe acute respiratory syndrome coronavirus 2 (SARS-CoV-2) outbreak a pandemic. As of 13<sup>th</sup> January 2021, there have been over 92,096,179 cumulative confirmed cases of coronavirus disease (COVID-19) and over 1,972,758 deaths reported globally.[1] The first confirmed COVID-19 case in Africa occurred in Egypt on February 14, 2020. To-date, African countries have reported lower disease incidence than most other countries, with 3,113,963 confirmed cases and 74,619 deaths as of 13<sup>th</sup> January 2021 across the continent. However, infectious disease surveillance and reporting infrastructure remain highly underdeveloped, and COVID-19 testing is limited given the shortage of human resources and appropriate laboratory and surveillance facilities across the continent.[2]

Although uncertainties underlying SARS-CoV-2 disease transmission and severity persist, ongoing analysis of available data suggests that old age and underlying health conditions play a critical role in the severity of disease prognosis.[3,4] Approximately 75% of the African population is less than 35 years of age, and African countries may benefit from a largely young population.[5] However, these populations may also be at particular risk for high morbidity and mortality from COVID-19 given the high prevalence of immunocompromised individuals. In 2016, 417,000 people died from tuberculosis in the African region, where 25% of the world's TB deaths occur.[6] Other prevalent co-morbidities include HIV, for which many patients are receiving anti-retroviral therapy, and malnutrition, in addition to other communicable and non-communicable diseases.[7–9]

To mitigate the spread of COVID-19, the majority of African countries reduced or banned international travel and instituted curfews, lockdowns, and other social distancing interventions beginning in March and April 2020.[10] Several studies have demonstrated the effectiveness of social distancing and other quarantine measures in tandem with a rapid scale up of SARS-CoV-2 testing.[11] By one estimate, the number of people likely to be infected with the virus after encountering an infected individual declined by 55 percent after one week of shutdown in Wuhan, China.[12] However, as the majority of these restrictions were lifted in June 2020, the transmission rate is expected to increase, especially in highly populated areas where social distancing is not feasible.

In this analysis, we combine best available estimates of the parameters that govern SARS-CoV-2 transmission dynamics with country-specific population data to estimate potential COVID-19 case burdens under four scenarios: baseline (assuming disease transmission is not mitigated by appropriate interventions), moderate lockdown, hard lockdown, and hard lockdown with continued social distancing. Given the current lack of data and understanding of how COVID-19 will impact the continent, these estimates are generated to inform national and continental COVID-19 preparation and response efforts on the basis of how this disease has spread elsewhere.

## METHODS

### Data

1  
2  
3 The number of confirmed COVID-19 cases and the date of the first twenty or more cases were  
4 obtained for each country using data aggregated by the Johns Hopkins Centers for Systems  
5 Science and Engineering as of 25<sup>th</sup> June 2020.[1] Lockdown start and end dates, where  
6 applicable, were compiled from a variety of sources including news media reports and  
7 government statements (Supplementary File 1 and results section). Although data are as current  
8 as possible, many government policies are under continuous review and lockdown dates may  
9 become rapidly outdated. Where countries do not have dates for the lifting of lockdown, a  
10 duration of 60 days has been assumed in line with the recommendations of many governments.  
11 Country population estimates were obtained from the World Bank.[13] Projections were  
12 simulated across all African nations and territories (excluding Comoros, Mayote, Reunion,  
13 Lesotho, and St. Helena which were omitted for lack of sufficient case data).  
14  
15

16  
17 For all included countries, we used case data for 200 days after the first 20 or more confirmed  
18 cases were recorded. Only the Seychelles has not yet reached this 20-case threshold, where  
19 confirmed cases remain at 11 since April 6, 2020. For this case the highest number and the date  
20 this figure was first recorded were used to initiate the model. Model start and end dates for each  
21 country are provided in the results section.  
22  
23  
24  
25  
26  
27  
28  
29  
30  
31  
32  
33  
34  
35  
36  
37  
38  
39  
40  
41  
42  
43  
44  
45  
46  
47  
48  
49  
50  
51  
52  
53  
54  
55  
56  
57  
58  
59  
60

To incorporate the varying age structures of different countries into the model, parameters were weighted by the proportion of the population in the 0-64, 65-79, and 80 and above age brackets in each country to form a unique set of parameters for each country (Supplementary File 2). Demographic data were obtained from the World Bank for 2018,[13] with the exception of Eritrea, for which population data came from IndexMundi.[14] Many African countries have high rates of TB and HIV/AIDS which are likely to make their populations more vulnerable to severe infection. To further consider the impact of this on our analysis we reweighted the parameters according to the proportion of the younger population with HIV and/or TB [15] (Supplementary File 3). Those over age 80, and 65-79 were modeled as before, however the under 64 cohort was split into healthy individuals and those affected by TB and/or HIV/AIDS. For this group we employed the parameter set previously used for the 0-64-year-old cohort, with the exception of progression to severe disease ( $\kappa h$ ), which was doubled to 0.404 (upper bound tripled to 0.606 and lower bound of 0.202), for populations with HIV/AIDS and/or TB, based on estimates for mortality from South Africa.[16,17] Algeria, Mauritius, Eritrea, and Seychelles were excluded from this second analysis due to lack of data.

## Model Structure

### *Epidemiological equations and parameters*

The model follows a modified SEIR structure (Figure 1) with seven unique compartments to describe the epidemiology of SARS-CoV-2. This is adapted from the model structure previously described in Lin *et al.* 2020.[18] This model is adapted from the Kermack and McKendrick compartmental model according to the disease dynamics that have been reported for COVID-19. The model assumptions are described in further depth in [18], but in brief, we assume susceptible individuals that become infected have an incubation period; and some asymptomatic or mildly symptomatic individuals are neither tested nor counted as confirmed cases. Susceptible individuals,  $S$ , are those in the population that can become infected with the virus. They become exposed,  $E$ , to SARS-CoV-2 by encountering infected individuals in the population at rate  $\beta_1$  for asymptomatic individuals or  $\beta_2$  for symptomatic individuals. We assume that individuals that are asymptomatic or mildly symptomatic have a lower transmission rate,  $\beta_1$ , than more symptomatic individuals,  $\beta_2$ . [18] Exposed individuals incubate the virus at rate  $\mu$  (calculated as the inverse of the incubation period). A proportion of these individuals,  $\theta$ , become symptomatically infected while the rest become contagious with mild or no symptoms,  $C$ . Of the symptomatically infected individuals, a proportion,  $h$ , have severe symptoms, to the extent that they will require hospitalization if available,  $I_S$ , and the rest have moderate or non-severe symptoms,  $I_N$ . Asymptomatic or mildly symptomatic, moderately symptomatic, and severely symptomatic individuals recover (or otherwise become non-contagious),  $R$ , at rates  $\gamma_1$ ,  $\gamma_2$ , and  $\gamma_3$ , respectively. It is assumed that recovered individuals are immune from becoming re-infected during the time period of the study. Severely infected individuals may also die,  $D$ , at rate  $\delta$ .

The model is described by the following set of differential equations:

$$N = \sum (S + E + C + I_N + I_S + D + R)$$

$$\dot{S} = -\beta_1 \frac{SC}{N} - \beta_2 \frac{S(I_N + I_S)}{N}$$

$$\dot{E} = \beta_1 \frac{SC}{N} + \beta_2 \frac{S(I_N + I_S)}{N} - \mu E$$

$$\dot{C} = \mu(1 - \theta)E - \gamma_1 C$$

$$\dot{I}_N = \mu\theta(1 - h)E - \gamma_2 I_N$$

$$\dot{I}_S = \mu\theta h E - \gamma_3 I_S - \delta I_S$$

$$\dot{D} = \delta I_S$$

$$\dot{R} = \gamma_1 C + \gamma_2 I_N + \gamma_3 I_S$$

## Estimation of Epidemiological Parameters

Parameters are estimated from the literature and the sources for this are outlined in Table 1 and Supplementary File 4.

To assess the uncertainty of the parameter ranges on model estimations, we used Latin Hypercube Sampling (LHS), a stratified sampling technique that efficiently analyzes large numbers of input parameters by treating each parameter as a separate random variable [19]. LHS is a type of Monte Carlo sampling which treats each input parameter as a separate random variable and is able to efficiently analyze large sets of input parameters. The parameter distribution is stratified into equiprobable intervals and then each of these intervals is sampled once, without replacement. These random samples of each of the input parameters are then collated into an input vector. This process is highly efficient as each parameter is only used once and the model is then run to derive distribution functions for each of the output variables. The probabilistic nature of this technique allows it to be conveniently used within a statistical framework. Stochastic sampling of the parameters with LHS was based on an estimation of parameter ranges obtained from the literature (Table 1). From the parameter sampling, we were able to calculate the 95% confidence interval (CI) for all compartment values over the temporal domain.

## Scenarios and Assumptions

We provide case projections for the following four scenarios:

1. **Baseline:** Disease continues to spread with no curfew, lockdown, social distancing, or other intervention(s) and with no change in transmission rate.

1  
2  
3  
4  
5  
6  
7  
8  
9  
10  
11  
12  
13  
14  
15  
16  
17  
18  
19  
20  
21  
22  
23  
24  
25  
26  
27  
28  
29  
30  
31  
32  
33  
34  
35  
36  
37  
38  
39  
40  
41  
42  
43  
44  
45  
46  
47  
48  
49  
50  
51  
52  
53  
54  
55  
56  
57  
58  
59  
60

2. **Moderate Lockdown:** Disease transmission is reduced by 25% during the lockdown period, then transmission resumes at 90% of the pre-lockdown value due to sustained changes in behavior.

3. **Hard Lockdown:** Disease transmission falls 44% during the lockdown period, then transmission resumes at 90% of pre-lockdown levels.

4. **Hard Lockdown and Continued Social Distancing/Isolating Cases:** Disease transmission is reduced by 44% during the lockdown period then, through social distancing regulations and isolation of symptomatic individuals, resumes at 75% of pre-lockdown levels.

For each scenario, we estimate the total number of infections that are asymptomatic or mildly symptomatic, moderately symptomatic, and severely symptomatic cases. The rate of severely symptomatic cases is based on the rate of hospitalization in other parts of the world, although access to hospital care is likely to differ greatly between different parts of Africa.[20]

**Table 1.** Parameters estimation from other literature where the means and corresponding credible intervals are shown in the parenthesis

| Parameter  | Definition                                                                           | Value                                      | Calculation                                            | Ref                                                        |         |
|------------|--------------------------------------------------------------------------------------|--------------------------------------------|--------------------------------------------------------|------------------------------------------------------------|---------|
| $R_0$      | Basic Reproduction Number                                                            | 3.1<br>(1.9 – 6.5)                         |                                                        | [21]                                                       |         |
| $\theta$   | Symptomatic rate                                                                     | 0.792<br>(0.568-0.815)                     |                                                        | [22–24]                                                    |         |
| $\beta_2$  | Infection rate for symptomatic transmissions                                         | 0.62<br>(0.38-1.3)                         | $\frac{R_0}{\text{Infectious Period}_{\text{Severe}}}$ | [25]                                                       |         |
| $\alpha$   | Reduction of infection rate for asymptomatic transmission                            | 0.55<br>(0.46-0.62)                        |                                                        | [26]                                                       |         |
| $\beta_1$  | Infection rate for asymptomatic transmissions                                        | 0.341<br>(0.175-0.806)                     | $\beta_1 = \alpha\beta_2$                              |                                                            |         |
| $\gamma_1$ | Clearance rate for asymptomatic/mild cases                                           | 0.170<br>(0.0526-0.287)                    | $\frac{1}{\text{Infectious Period}_{\text{Mild}}}$     | [22,26]                                                    |         |
| $\gamma_2$ | Clearance rate for symptomatic non-severe cases                                      | 0.238<br>(0.143-0.333)                     | $\frac{1}{\text{Infectious Period}_{\text{sympt}}}$    | [27–29]                                                    |         |
| $\gamma_3$ | Clearance rate for symptomatic severe cases                                          | 0.238<br>(0.143-0.333)                     | $\frac{1}{\text{Infectious Period}_{\text{sympt}}}$    | [27–29]                                                    |         |
| $\mu$      | Incubation rate                                                                      | 0.202<br>(0.101-0.364)                     | $\frac{1}{\text{Incubation Time}}$                     | [30,31]                                                    |         |
| $\delta$   | Severe case fatality rate                                                            | 0.244<br>(0.209-0.280)                     |                                                        | [17,32]                                                    |         |
| $\kappa$   | Increase in rate of progression to severe disease in populations with TB or HIV/AIDS | 2.14<br>(1.1-2.7)                          |                                                        | [16,17]                                                    |         |
| $h$        | Rate of progression to severe disease <sup>‡</sup>                                   | <i>Ages 0-64</i><br>0.202<br>(0.167-0.237) | <i>Ages 65-79</i><br>0.361<br>(0.286-0.435)            | <i>Ages <math>\geq 80</math></i><br>0.471<br>(0.308-0.634) | [33,34] |
| $\kappa h$ | Rate of progression to severe disease in populations with TB and/or HIV/AIDS         | 0.432<br>(0.222-0.545)                     |                                                        |                                                            |         |

<sup>‡</sup> Age groups are: 0-59, 60-69, 70+; 0-64, 65-74, 65+, US hospitalization rate used as a proxy for severe disease progression

## Patient and Public Involvement Statement

It was not appropriate or possible to involve patients or the public in the design, or conduct, or reporting, or dissemination plans of our research.

## RESULTS

Under baseline conditions, the most populous countries stand to bear the greatest disease burden with Nigeria having an estimated peak case load of 645,081 severe infections (0.31 percent of total country population) and 9,359,221 total infections (4.54% of total country population), followed by Ethiopia, with an estimated peak case load of 335,024 (0.29%) severe infections and 4,978,734 (4.33%) total infections (Figure 2). Smaller countries have a lower case load; Cabo Verde is projected to have a peak case load of 2,244 severe infections (0.40% of total country population) and 32,811 (5.90%) total infections, Sao Tome and Principe are estimated to experience peaks of 14,012 (6.40%) total infections and 1,048 (0.48%) severe infections (Figures s1, s3-10). However, the baseline scenario does not reflect the current situation in any country as all countries have instituted some form of social distancing policies.

Moderate lockdowns (assumed to lower transmission by 25% during lockdown), reduced estimated peak severe infections by 10% in Senegal, to 37%, in Ethiopia and Egypt (Figure 3). However, South Africa the peak of the severe case load showed a 1% increase of 1,929, given a moderate lockdown of 35 days (Figures s1-s11, Supplementary File 4). Longer lockdowns were more effective. In Egypt and Ethiopia, who have the longest planned lockdowns of any of the African countries (137 and 170 days, respectively), the estimated impact was a reduction in total peak cases of 37%, or 130,998 and 123,890 severe cases, respectively (Figure 4). In addition, the estimated peak of infections was shifted by 35 and 27 days, respectively (Table 2). In Cabo Verde, which had the shortest planned lockdown of 17 days, the estimated reduction in severe peak cases was 19% under a moderate lockdown, and the peak date of infections was shifted by 10 days (Figure 4).

The effect of hard temporary lockdowns without extended post-lockdown social distancing compared to moderate lockdowns varied by country. The reduction in severe peak infections ranged from 7%, in Rwanda, to 35% in Egypt, compared to baseline values. In some countries a hard lockdown had a lower impact on reducing peak cases than a moderate one. For example, in Ethiopia the expected impact of a moderate lockdown reduced severe cases by 123,890 cases compared to baseline, while a hard lockdown reduced cases by 100,743. However, hard lockdowns delayed the onset of the peak in infections compared to moderate lockdowns by several weeks. For example, in Tanzania, a moderate lockdown of 60 days delayed the peak in severe infections by 16 days compared to a 47-day delay in the case of a hard lockdown (s2, s3, Supplementary File 4).

For all countries, hard lockdowns with continued post-lockdown interventions were the most effective in delaying and reducing peak infections. Delays to the peak in infections ranged from 22 days in Libya to 123 days in Ethiopia (Table 2). This reflects the different lengths of lockdowns in these countries which lasted 20, and 170 days respectively. Hard lockdowns with continued interventions also led to the greatest reductions in the peak in estimated total infections



to the greatest extent in these model projections, from 36% in Ghana and South Africa to 58% in Namibia. In Kenya this would reduce the peak case load in severe infections by 100,552 cases with a lockdown of 43 days.

Many African countries have young populations, who have been less likely to show severe symptoms in other countries, however, the high prevalence of HIV/AIDS and TB in these populations potentially renders them more vulnerable to COVID-19.[16] The highest proportional burden HIV countries in Africa are Eswatini, Botswana and South Africa and the highest proportional burden tuberculosis countries are Burundi and Central African Republic. Assuming individuals with TB and HIV/AIDS, once infected, are more likely to progress to severe disease increased the peak number of infections significantly (Figure 5). In Eswatini, Botswana, and South Africa the baseline peak number of severe infections increased from 4,529 to 5,279, 9,334 to 10,023, and from 162,977 to 203,261, respectively (Figures s12-s22, Supplementary File 4). In Burundi, the peak number of severe cases increased from 40,417 to 44,058. However, progression to severe disease may, under certain circumstances, lead to less infections, as those with severe disease may be more likely to die, quarantine, or be sick enough that they are not widely transmitting the disease. For example, in Nigeria, severe infections decrease from 645,081 to 591,888 under this scenario.

Table 2: Lockdown and Peak Dates

| Country                  | Beginning Date of Simulation | Start Date of Lockdown | Duration of Lockdown (Days) | Date of Peak Infections (Baseline) | Date of Peak Infections (Moderate Lockdown) | Date of Peak Infections (Hard Lockdown) | Date of Peak Infections (Hard Lockdown with Social Distancing) |
|--------------------------|------------------------------|------------------------|-----------------------------|------------------------------------|---------------------------------------------|-----------------------------------------|----------------------------------------------------------------|
| Algeria                  | 3/9/20                       | 3/23/20                | 82                          | 7/2/20                             | 7/22/20                                     | 8/27/20                                 | 8/14/20                                                        |
| Angola                   | 4/18/20                      | 3/31/20                | 70                          | 8/6/20                             | 8/29/20                                     | 9/12/20                                 | 10/3/20                                                        |
| Benin                    | 4/5/20                       | 3/30/20                | 41                          | 7/15/20                            | 7/31/20                                     | 8/15/20                                 | 9/23/20                                                        |
| Botswana                 | 4/19/20                      | 4/6/20                 | 46                          | 7/16/20                            | 8/18/20                                     | 8/22/20                                 | 9/5/20                                                         |
| Burkina Faso             | 3/18/20                      | 3/21/20                | 54                          | 7/1/20                             | 7/23/20                                     | 7/25/20                                 | 8/6/20                                                         |
| Burundi                  | 5/17/20                      | 3/21/20                | 39                          | 9/3/20                             | 9/11/20                                     | 9/23/20                                 | 10/9/20                                                        |
| Cabo Verde               | 4/15/20                      | 3/28/20                | 17                          | 7/6/20                             | 7/16/20                                     | 7/29/20                                 | 8/3/20                                                         |
| Cameroon                 | 3/20/20                      | 3/18/20                | 44                          | 7/6/20                             | 7/21/20                                     | 8/11/20                                 | 8/29/20                                                        |
| Central African Republic | 4/28/20                      | 3/30/20                | 60                          | 8/9/20                             | 8/31/20                                     | 9/7/20                                  | 9/29/20                                                        |
| Chad                     | 4/13/20                      | 4/2/20                 | 43                          | 7/28/20                            | 8/3/20                                      | 9/6/20                                  | 9/26/20                                                        |
| Congo (Brazzaville)      | 4/2/20                       | 3/31/20                | 61                          | 7/12/20                            | 7/28/20                                     | 8/27/20                                 | 8/26/20                                                        |
| Congo (Kinshasa)         | 3/21/20                      | 3/18/20                | 78                          | 7/9/20                             | 8/11/20                                     | 8/30/20                                 | 9/9/20                                                         |
| Cote d'Ivoire            | 3/23/20                      | 3/16/20                | 62                          | 7/3/20                             | 7/20/20                                     | 8/16/20                                 | 8/29/20                                                        |
| Djibouti                 | 3/31/20                      | 3/23/20                | 46                          | 6/22/20                            | 7/20/20                                     | 8/4/20                                  | 8/18/20                                                        |

1  
2  
3  
4  
5  
6  
7  
8  
9  
10  
11  
12  
13  
14  
15  
16  
17  
18  
19  
20  
21  
22  
23  
24  
25  
26  
27  
28  
29  
30  
31  
32  
33  
34  
35  
36  
37  
38  
39  
40  
41  
42  
43  
44  
45  
46  
47  
48  
49  
50  
51  
52  
53  
54  
55  
56  
57  
58  
59  
60

|                       |         |         |     |         |         |          |          |
|-----------------------|---------|---------|-----|---------|---------|----------|----------|
| Egypt                 | 3/8/20  | 3/15/20 | 137 | 6/22/20 | 7/27/20 | 10/2/20  | 9/14/20  |
| Equatorial Guinea     | 4/12/20 | 3/26/20 | 64  | 7/5/20  | 7/27/20 | 8/13/20  | 8/26/20  |
| Eritrea               | 4/2/20  | 3/23/20 | 31  | 7/4/20  | 7/24/20 | 7/30/20  | 8/18/20  |
| Eswatini              | 4/18/20 | 3/26/20 | 42  | 7/19/20 | 7/28/20 | 8/24/20  | 8/30/20  |
| Ethiopia              | 3/29/20 | 3/22/20 | 170 | 7/22/20 | 8/18/20 | 10/27/20 | 11/22/20 |
| Gabon                 | 4/2/20  | 3/20/20 | 58  | 7/5/20  | 7/19/20 | 8/5/20   | 8/27/20  |
| Gambia                | 5/11/20 | 3/17/20 | 59  | 8/11/20 | 8/29/20 | 9/29/20  | 10/8/20  |
| Ghana                 | 3/22/20 | 3/17/20 | 34  | 7/11/20 | 7/8/20  | 7/25/20  | 8/8/20   |
| Guinea                | 3/30/20 | 3/26/20 | 50  | 7/8/20  | 7/19/20 | 8/15/20  | 8/30/20  |
| Guinea-Bissau         | 4/7/20  | 3/17/20 | 55  | 7/13/20 | 7/31/20 | 8/12/20  | 8/19/20  |
| Kenya                 | 3/24/20 | 3/15/20 | 43  | 7/14/20 | 8/14/20 | 8/27/20  | 9/13/20  |
| Liberia               | 4/8/20  | 3/22/20 | 21  | 7/15/20 | 7/19/20 | 8/9/20   | 8/18/20  |
| Libya                 | 4/7/20  | 4/17/20 | 20  | 7/19/20 | 7/28/20 | 8/6/20   | 8/10/20  |
| Madagascar            | 3/26/20 | 3/23/20 | 60  | 7/6/20  | 8/5/20  | 8/15/20  | 8/23/20  |
| Malawi                | 4/22/20 | 3/23/20 | 48  | 8/7/20  | 8/13/20 | 9/17/20  | 10/21/20 |
| Mali                  | 3/30/20 | 3/15/20 | 55  | 7/24/20 | 8/8/20  | 8/26/20  | 9/4/20   |
| Mauritania            | 5/14/20 | 3/15/20 | 60  | 8/18/20 | 9/9/20  | 10/3/20  | 10/9/20  |
| Mauritius             | 3/22/20 | 3/29/20 | 64  | 6/20/20 | 7/15/20 | 8/1/20   | 8/14/20  |
| Morocco               | 3/15/20 | 3/15/20 | 87  | 6/28/20 | 7/26/20 | 8/25/20  | 8/18/20  |
| Mozambique            | 4/10/20 | 3/23/20 | 68  | 7/20/20 | 8/17/20 | 9/10/20  | 10/9/20  |
| Namibia               | 4/5/20  | 3/17/20 | 76  | 7/8/20  | 8/5/20  | 8/17/20  | 8/18/20  |
| Niger                 | 3/30/20 | 3/20/20 | 113 | 7/14/20 | 8/23/20 | 9/22/20  | 9/16/20  |
| Nigeria               | 3/21/20 | 3/30/20 | 63  | 7/15/20 | 8/4/20  | 9/4/20   | 9/30/20  |
| Rwanda                | 3/23/20 | 3/21/20 | 60  | 7/2/20  | 7/15/20 | 8/19/20  | 9/12/20  |
| Sao Tome and Principe | 5/5/20  | 3/17/20 | 60  | 7/22/20 | 8/13/20 | 9/1/20   | 9/8/20   |
| Senegal               | 3/15/20 | 3/14/20 | 77  | 6/30/20 | 7/17/20 | 8/12/20  | 8/18/20  |
| Seychelles            | 4/6/20  | 3/16/20 | 60  | 6/19/20 | 7/5/20  | 7/21/20  | 8/15/20  |
| Sierra Leone          | 4/17/20 | 4/4/20  | 60  | 7/21/20 | 8/8/20  | 8/28/20  | 9/13/20  |
| Somalia               | 4/10/20 | 3/18/20 | 60  | 7/17/20 | 8/17/20 | 8/24/20  | 9/15/20  |
| South Africa          | 3/13/20 | 3/27/20 | 35  | 6/23/20 | 7/11/20 | 8/11/20  | 8/1/20   |
| South Sudan           | 4/28/20 | 3/25/20 | 60  | 8/9/20  | 9/7/20  | 9/9/20   | 9/21/20  |
| Sudan                 | 4/13/20 | 3/15/20 | 80  | 7/29/20 | 8/22/20 | 9/19/20  | 10/9/20  |

|          |         |         |    |         |         |         |         |
|----------|---------|---------|----|---------|---------|---------|---------|
| Tanzania | 4/1/20  | 3/23/20 | 60 | 7/18/20 | 8/3/20  | 9/3/20  | 9/20/20 |
| Togo     | 3/24/20 | 3/20/20 | 60 | 7/2/20  | 7/12/20 | 8/30/20 | 8/16/20 |
| Tunisia  | 3/16/20 | 3/12/20 | 53 | 6/20/20 | 7/31/20 | 7/27/20 | 8/12/20 |
| Uganda   | 3/27/20 | 3/18/20 | 47 | 7/10/20 | 7/30/20 | 8/16/20 | 8/27/20 |
| Zambia   | 3/27/20 | 3/17/20 | 38 | 6/30/20 | 7/27/20 | 8/15/20 | 9/3/20  |
| Zimbabwe | 4/15/20 | 3/23/20 | 60 | 7/26/20 | 8/25/20 | 9/8/20  | 9/19/20 |

## Conclusion

Most African countries are likely early in the outbreak of SARS-CoV-2, and the initial peak in infections may be several months away in many cases. Policymakers need mathematical models that are attuned to the context in Africa to aid in planning for continued transmission of the virus and to develop interventions that reduce disease transmission. Here we analyzed a model of transmission of SARS-CoV-2 parameterized for low-resource settings. Based on current observed cases of COVID-19 in African countries, we assessed the impact of strict social distancing measures. However, the extent and efficacy of lockdown policies is certain to vary between and within countries. Furthermore, after a lockdown, and in response to a high death toll, citizens are likely to continue to adjust their social behavior.[35] The results from our simulations suggest that national lockdowns will likely slow viral transmission, reducing the peak number of active cases and delaying the time until the peak occurs. This delay can allow governments time to prepare by setting up designated COVID-19 treatment sections in hospitals and additional testing centers in densely populated areas, as well as practical measures within communities such as handwashing stations and soap distribution and information campaigns educating the public in infection prevention behaviors including mask wearing, social distancing and handwashing. Our models suggest that by using this time to prepare, transmission is likely to decrease enough to substantially reduce the peak in infections, even after lockdowns cease. This may make the consequences of the pandemic more manageable for health and social systems, though many are still likely to become overwhelmed.

The predicted dates of peak cases varied greatly by country, from 1<sup>st</sup> August in South Africa to 22<sup>nd</sup> December in Ethiopia in the case of a hard lockdown with continued social distancing (Scenario 3) (Table 2, Figure 2). This is due to many factors including differences in population size, when the virus first arrived in the country, and length and severity of lockdown interventions. Most infections are mild; however, some countries are likely to bear a much higher per capita burden than others, largely due to differences in the duration and efficacy of lockdowns.

This model considers the impact of lockdown on transmission of SARS-CoV-2; however, effective implementation of large-scale mitigation measures thus far implemented in developed countries may not be feasible or sustainable in many low- and middle-income countries (LMICs) in Africa and around the world given various sociocultural, economic, and political challenges.[36,37] Across the African continent, an estimated 40% of people live below the international poverty line making less than \$1.90 (in 2011 purchasing parity power) per day, and approximately 85.8% of employment is informal.[38,39] Therefore, lockdowns that restrict

1  
2  
3 movement to and from work will likely not be well enforced. Furthermore, access to hygiene and  
4 sanitation facilities is limited; in 2017, only 15% of people across sub-Saharan Africa had access  
5 to basic handwashing facilities with soap and water. [40] Social distancing within communities  
6 and within households is often not possible given over 55% of Africa's urban populations live in  
7 densely populated slums, higher than the global average of 30%.[41] In addition, there are 6.3  
8 million refugees and 17.7 million internally displaced persons in the African continent, and  
9 ongoing humanitarian crises have displaced over 20 million people. These challenges will also  
10 abrogate the effectiveness of restrictions on movement and access to care.[42]  
11  
12

13  
14 COVID-19 presents most severely in the elderly population and those with chronic non-  
15 communicable diseases such as diabetes and hypertension, which affects an estimated 55% of  
16 Africans.[43] African populations may benefit from having a younger population and low  
17 prevalence of diabetes (3.9%) compared to the global average (9.3%).[44,45] In the model, we  
18 modify the transmission and mortality rates according to the age structure of countries, based on  
19 evidence that morbidity and mortality is concentrated in older individuals. However emerging  
20 reports of COVID-19 cases in the developing world, particularly Brazil, suggest the death toll in  
21 the young may be higher than expected.[46] Young populations who go out to work, buy food  
22 and look after the family are hard to shield and likely to be highly exposed to the virus. The  
23 average size of households with older members is 12.1 in Senegal and 12.6 in the Gambia, the  
24 highest in the world,[47] and this may increase the potential for exposure to the virus and hinder  
25 isolation of symptomatic cases. High rates of tuberculosis, HIV, malaria, and other infectious  
26 diseases may also make young African populations more vulnerable to severe infection with  
27 COVID-19. In West and Central Africa 60% of people living with HIV do not receive treatment.  
28 [48] The high prevalence of malnutrition, anemia, and exposure to indoor air pollution, often  
29 from cooking fires, may also increase vulnerability. Additionally, the poor air quality in many  
30 Africa cities, which has been shown to be associated with increased morbidity and mortality  
31 from COVID-19,[49,50] may exacerbate issues for the region.[51]  
32  
33  
34

35  
36 Testing capacity is limited in much of Africa,[52] and confirmed cases may increase faster than  
37 predicted in the near future as testing capacity increases and contact tracing continues. In  
38 addition, evidence suggests that many cases are asymptomatic and may be missed by testing  
39 protocols that only include those with symptoms who have recently travelled to an infected area  
40 or their contacts. Furthermore, social stigma and inability to access healthcare may prevent  
41 symptomatic individuals from seeking treatment. This may affect the results of the model as it  
42 uses the initial numbers of confirmed COVID-19 cases recorded. In addition, results from the  
43 model suggest cases may rapidly rise after a hard lockdown if there are no further mitigation  
44 measures. Contact tracing and testing are needed to maintain the reduction in cases gained from  
45 early lockdowns. Pooled testing can make mass testing more affordable and achievable with  
46 limited resources.[53]  
47  
48

49  
50 There are inherent difficulties in inferring real world results from mass action models such as the  
51 one in this study. Our models tend to overestimate the number of infections as they assume  
52 people are well mixed, despite many social, physical and geographical barriers to mixing within  
53 countries. Peaks in transmission are likely to occur at different times in different regions, as has  
54 occurred in the United States and Europe where there have been multiple epicenters. This model  
55 is not stochastic and case data are modeled from the first twenty or more cases, each behaving as  
56  
57  
58  
59  
60

1  
2  
3 an average case. In reality, there are no average cases; some individuals are likely to have many  
4 contacts, causing multiple infections,[54] and others to have very few. Superspreading events are  
5 likely to play a key role in the transmission of SARS-CoV-2 and, though beyond the scope of  
6 this model, this is an important consideration for future work. The different contact patterns of  
7 different segments of the population were also not included in this model and may have an  
8 impact on transmission between vulnerable groups. In different countries and different contexts  
9 the impact of lockdowns and other methods to reduce transmission are likely to be different. For  
10 this reason we have considered a range of values for the reduction in transmission, however  
11 values outside of this range are entirely possible. We have gathered data, from multiple sources,  
12 on the dates of lockdown interventions in countries across the African continent and this data is  
13 accurate to the best of our knowledge. However, interventions are likely to have been enacted to  
14 a different extent in different parts of a given country and often these dates and interventions  
15 differ at the level of districts and cities. It was not possible to capture this level of heterogeneity  
16 here.  
17  
18  
19

20 The estimates presented here suggest that the burden of severe disease caused by SARS-CoV-2  
21 is likely to be high for the African continent. Projections of disease progression are needed to  
22 enable policy makers, governments, aid agencies and other actors to optimize resource allocation  
23 and planning decisions. The high prevalence of TB, HIV, and malnutrition and other  
24 immunocompromising conditions accompanied by limited testing capacity and access to  
25 healthcare in many African countries are likely to make populations particularly vulnerable to  
26 this pandemic. Immediate planning and appropriate resource allocation are essential to save lives  
27 and mitigate the impact of COVID-19 in Africa.  
28  
29  
30  
31  
32  
33  
34  
35  
36  
37  
38  
39  
40  
41  
42  
43  
44  
45  
46  
47  
48  
49  
50  
51  
52  
53  
54  
55  
56  
57  
58  
59  
60

## AUTHOR CONTRIBUTIONS

IF, JC, GO, KT, OG, ES, E. Kalanxhi and SH contributed to the analysis, data collection and figures. E. Klein, GL and YY developed the model and original code with adaptations and additions by IF. IF, JC, and SH contributed to the writing, and all authors provided critical revisions of the manuscript.

## ACKNOWLEDGEMENTS

This work was supported by the Centers for Disease Control and Prevention Modeling in Infectious Disease (MInD) in Healthcare Network.

## DATA SHARING

The data for this study is included in the manuscript and supplementary materials, however please contact the corresponding author for any further data.

## REFERENCES

- 1 Dong E, Du H, Gardner L. An interactive web-based dashboard to track COVID-19 in real time. *Lancet Infect Dis* Published Online First: 2020. doi:10.1016/S1473-3099(20)30120-1
- 2 Adebisi YA, Oke GI, Ademola PS, *et al.* SARS-CoV-2 diagnostic testing in Africa: needs and challenges. *Pan Afr Med J* 2020;**35**:3–4. doi:10.11604/pamj.2020.35.4.22703
- 3 Remuzzi A, Remuzzi G. COVID-19 and Italy: what next? *Lancet* 2020;:S0140673620306279. doi:10.1016/S0140-6736(20)30627-9
- 4 Wu Z, McGoogan JM. Characteristics of and Important Lessons From the Coronavirus Disease 2019 (COVID-19) Outbreak in China: Summary of a Report of 72 314 Cases From the Chinese Center for Disease Control and Prevention. *JAMA* Published Online First: February 2020. doi:10.1001/jama.2020.2648
- 5 United Nations Population Division. World Population Prospects 2019. 2019.
- 6 WHO. Tuberculosis Factsheet.
- 7 Ibrahim MK, Zambruni M, Melby CL, *et al.* Impact of Childhood Malnutrition on Host Defense and Infection. *Clin Microbiol Rev* 2017;**30**:919–71. doi:10.1128/CMR.00119-16
- 8 Schaible UE, Kaufmann SHE. Malnutrition and infection: Complex mechanisms and global impacts. *PLoS Med* 2007;**4**:0806–12. doi:10.1371/journal.pmed.0040115
- 9 Taylor A, Vora K, Cao W, *et al.* Protein energy malnutrition decreases immunity and increases susceptibility to influenza infection. *J Immunol* 2011;**186**:67.5 LP-67.5. [http://www.jimmunol.org/content/186/1\\_Supplement/67.5.abstract](http://www.jimmunol.org/content/186/1_Supplement/67.5.abstract)
- 10 World Health Organization [WHO]. Public health and social measures (PHSMs) database. 2020.
- 11 Nussbaumer-Streit B, Mayr V, Ai D, *et al.* Quarantine alone or in combination with other public health measures to control COVID-19: a rapid review (Review). *Cochrane Database Syst Rev* Published Online First: 2020. doi:10.1002/14651858.CD013574. [www.cochranelibrary.com](http://www.cochranelibrary.com)
- 12 Kucharski AJ, Russell TW, Diamond C, *et al.* Early dynamics of transmission and control of COVID-19: a mathematical modelling study. *Lancet Infect Dis* 2020;**20**:553–8. doi:10.1016/S1473-3099(20)30144-4
- 13 World Bank. World Development Indicators. <http://data.worldbank.org/indicator> (accessed 1 Jan 2018).
- 14 Index Mundi.
- 15 Institute for Health Metrics and Evaluation. GBD Compare. 2017. <http://vizhub.healthdata.org/gbd-compare> (accessed 15 Jul 2020).
- 16 Davies M-A. HIV and risk of COVID-19 death: a population cohort study from the Western Cape Province, South Africa. *medRxiv*;:1–21.
- 17 National Institute for Communicable Diseases. Covid-19 Sentinel Hospital Surveillance Update. 2020.
- 18 Lin G, Bhaduri A, Strauss AT, *et al.* Explaining the Bomb-Like Dynamics of COVID-19

- with Modeling and the Implications for Policy. *medRxiv* 2020.
- 19 McKay MD, Beckman RJ, Conover WJ. A Comparison of Three Methods for Selecting Values of Input Variables in the Analysis of Output from a Computer Code. *Technometrics* 1979;**21**:239–45.
- 20 Craig, J, Kalanxhi E, Hauck S. National estimates of critical care capacity in 54 African countries. *medRxiv* 2020.
- 21 Park M, Cook AR, Lim JT, *et al.* A Systematic Review of COVID-19 Epidemiology Based on Current Evidence. *J Clin Med* 2020;**9**:967. doi:10.3390/jcm9040967
- 22 Long QX, Tang XJ, Shi QL, *et al.* Clinical and immunological assessment of asymptomatic SARS-CoV-2 infections. *Nat Med* Published Online First: 2020. doi:10.1038/s41591-020-0965-6
- 23 Mizumoto K, Kagaya K, Zarebski A, *et al.* Estimating the asymptomatic proportion of coronavirus disease 2019 (COVID-19) cases on board the Diamond Princess cruise ship, Yokohama, Japan, 2020. *Eurosurveillance* 2020;**25**:1–5. doi:10.2807/1560-7917.ES.2020.25.10.2000180
- 24 Lavezzo E, Franchin E, Ciavarella C, *et al.* Suppression of COVID-19 outbreak in the municipality of Vo, Italy. *medRxiv* 2020;:2020.04.17.20053157. doi:10.1101/2020.04.17.20053157
- 25 Kissler SM, Tedijanto C, Goldstein E, *et al.* Projecting the transmission dynamics of SARS-CoV-2 through the postpandemic period. *Science (80- )* 2020;**368**:860–8. doi:10.1126/science.abb5793
- 26 Li R, Pei S, Chen B, *et al.* Substantial undocumented infection facilitates the rapid dissemination of novel coronavirus (SARS-CoV-2). *Science (80- )* 2020;**368**:489–93. doi:10.1126/science.abb3221
- 27 Prem K, Liu Y, Russell TW, *et al.* The effect of control strategies to reduce social mixing on outcomes of the COVID-19 epidemic in Wuhan, China: a modelling study. *Lancet Public Heal* 2020;**5**:e261–70. doi:10.1016/S2468-2667(20)30073-6
- 28 Woelfel R, Corman VM, Guggemos W, *et al.* Virological assessment of hospitalized cases of coronavirus disease 2019. *medRxiv* 2020;:2020.03.05.20030502. doi:10.1101/2020.03.05.20030502
- 29 Banerjee R, Bhattacharjee S, Varadwaj PK. Analyses and Forecast for COVID-19 epidemic in India. *medRxiv* 2020;:2020.06.26.20141077. doi:10.1101/2020.06.26.20141077
- 30 Liu T, Hu J, Xiao J, *et al.* Time-varying transmission dynamics of Novel Coronavirus Pneumonia in China. *Systems Biology* 2020.
- 31 Lauer SA, Grantz KH, Bi Q, *et al.* The Incubation Period of Coronavirus Disease 2019 (COVID-19) From Publicly Reported Confirmed Cases: Estimation and Application. *Ann Intern Med* 2020;**172**:577–82. doi:10.7326/M20-0504
- 32 Weiss P, Murdoch DR. Clinical course and mortality risk of severe COVID-19. *Lancet* 2020;**395**:1014–5. doi:10.1016/S0140-6736(20)30633-4
- 33 CDC COVID-19 Response Team. Severe Outcomes Among Patients with Coronavirus



- 1  
2  
3 Disease 2019 (COVID-19) — United States, February 12–March 16, 2020. *MMWR Morb*  
4 *Mortal Wkly Rep* 2020;**69**. doi:10.15585/mmwr.mm6912e2  
5
- 6 34 Garg S. Hospitalization Rates and Characteristics of Patients Hospitalized with  
7 Laboratory-Confirmed Coronavirus Disease 2019 — COVID-NET, 14 States, March 1–  
8 30, 2020. *MMWR Morb Mortal Wkly Rep* 2020;**69**:458–64.  
9 doi:10.15585/mmwr.mm6915e3  
10
- 11 35 Klein E, Laxminarayan R, Smith DL, *et al*. Economic incentives and mathematical models  
12 of disease. *Environ Dev Econ* 2007;**12**:707–32.  
13
- 14 36 Mboera LEG, Akipede GO, Banerjee A, *et al*. Mitigating lockdown challenges in response  
15 to COVID-19 in Sub-Saharan Africa. *Int J Infect Dis* 2020;**96**:308–10.  
16 doi:10.1016/j.ijid.2020.05.018  
17
- 18 37 Isbell T. COVID-19 lockdown in South Africa highlights unequal access to services.  
19 Afrobarometer. 2020.[http://www.afrobarometer.org/publications/ad358-covid-19-](http://www.afrobarometer.org/publications/ad358-covid-19-lockdown-south-africa-highlights-unequal-access-services)  
20 [lockdown-south-africa-highlights-unequal-access-services](http://www.afrobarometer.org/publications/ad358-covid-19-lockdown-south-africa-highlights-unequal-access-services)  
21
- 22 38 International Labour Organization. Women and men in the informal economy: A  
23 statistical picture. Third edition. 2018.  
24
- 25 39 World Bank. Poverty headcount ratio at \$1.90 a day (2011 PPP) (% of population).  
26
- 27 40 WHO, UNICEF. Progress on drinking water, sanitation and hygiene: 2017 update and  
28 SDG baselines.  
29
- 30 41 UN Habitat. UN’s Millenium Development Goals database. Geneva:  
31
- 32 42 UN High Commissioner for Refugees. Update of UNHCR’s operations in Africa. 2019.  
33
- 34 43 Bosu WK, Reilly ST, Aheto JMK, *et al*. Hypertension in older adults in Africa: A  
35 systematic review and meta-analysis. *PLoS One* 2019;**14**:e0214934–e0214934.  
36 doi:10.1371/journal.pone.0214934  
37
- 38 44 Gouda HN, Charlson F, Sorsdahl K, *et al*. Burden of non-communicable diseases in sub-  
39 Saharan Africa, 1990-2017: results from the Global Burden of Disease Study 2017.  
40 *Lancet Glob Heal* 2019;**7**:e1375–87. doi:10.1016/S2214-109X(19)30374-2  
41
- 42 45 Saeedi PP. Global and regional diabetes prevalence estimates for 2019 and projections for  
43 2030 and 2045: Results from the International Diabetes Federation Diabetes Atlas, 9th  
44 edition. In: *Diabetes Research and Clinical Practice*. 2019.  
45
- 46 46 McCoy T, Traiano H. In the developing world, the coronavirus is killing far more young  
47 people. Washington Post.  
48 2020.[https://www.washingtonpost.com/world/the\\_](https://www.washingtonpost.com/world/the_americas/coronavirus-brazil-killing-young-developing-world/2020/05/22/f76d83e8-99e9-11ea-ad79-eef7cd734641_story.html)  
49 [americas/coronavirus-brazil-killing-](https://www.washingtonpost.com/world/the_americas/coronavirus-brazil-killing-young-developing-world/2020/05/22/f76d83e8-99e9-11ea-ad79-eef7cd734641_story.html)  
50 [young-developing-world/2020/05/22/f76d83e8-99e9-11ea-ad79-eef7cd734641\\_](https://www.washingtonpost.com/world/the_americas/coronavirus-brazil-killing-young-developing-world/2020/05/22/f76d83e8-99e9-11ea-ad79-eef7cd734641_story.html)  
51 [story.html](https://www.washingtonpost.com/world/the_americas/coronavirus-brazil-killing-young-developing-world/2020/05/22/f76d83e8-99e9-11ea-ad79-eef7cd734641_story.html)  
52
- 53 47 Kamiya Y, Kamiya Y, Hertog S. Households and Living Arrangements of Older Persons  
54 Around the World. *Innov Aging* 2019;**3**:S806–S806. doi:10.1093/geroni/igz038.2967  
55
- 56 48 UNAIDS. People living with HIV receiving ART.  
57
- 58 49 Wu X, Nethery RC, Sabath MB, *et al*. Exposure to air pollution and COVID-19 mortality  
59 in the United States: A nationwide cross-sectional study. *medRxiv* Published Online First:  
60 2020.<https://www.medrxiv.org/content/10.1101/2020.04.05.20054502v2.full.pdf>

- 1  
2  
3 50 Conticini E, Frediani B, Caro D. Can atmospheric pollution be considered a co-factor in  
4 extremely high level of SARS-CoV-2 lethality in Northern Italy? *Environ Pollut*  
5 2020;**261**:114465. doi:10.1016/j.envpol.2020.114465  
6  
7 51 Amegah AK, Agyei-Mensah S. Urban air pollution in Sub-Saharan Africa: Time for  
8 action. *Environ Pollut* 2017;**220**:738–43. doi:10.1016/j.envpol.2016.09.042  
9  
10 52 Our World In Data. Coronavirus (COVID-19) Testing.  
11  
12 53 Narayanan K, Frost I, Heidarzadeh A, *et al.* Pooling RT-PCR or NGS samples has the  
13 potential to cost-effectively generate estimates of COVID-19 prevalence in resource  
14 limited environments. *medRxiv* Published Online First:  
15 2020.<https://www.medrxiv.org/content/10.1101/2020.04.03.20051995v1>  
16  
17 54 Abbott S, Kucharski AJ, Funk S. Estimating the overdispersion in COVID-19  
18 transmission using outbreak sizes outside China. *Well* 2020;:1–8.  
19  
20  
21  
22  
23  
24  
25  
26  
27  
28  
29  
30  
31  
32  
33  
34  
35  
36  
37  
38  
39  
40  
41  
42  
43  
44  
45  
46  
47  
48  
49  
50  
51  
52  
53  
54  
55  
56  
57  
58  
59  
60

## FIGURE LEGENDS

Figure 1. Modified SEIR model structure. Susceptible individuals,  $S$ , become exposed,  $E$ , to SARS-CoV-2. A proportion of these individuals become symptomatically infected with severe symptoms,  $I_S$ , or non-severe, symptoms,  $I_N$ , while the rest become contagious with mild or no symptoms,  $C$ . Asymptomatic or mildly symptomatic, moderately symptomatic and severely symptomatic individuals recover,  $R$ , and severely infected individuals may also die,  $D$ .

Figure 2. Projected total infections over time when parameters are normalized for the age distribution of the population in each country. Areas shaded in grey denote lockdown duration. SD denotes 'social distancing.'

Figure 3. Percent change in peak severe infections under moderate lockdown scenario, parameters adjusted by age only.

Figure 4. Percent change in peak total infections under interventions, compared to baseline, parameters adjusted by age only. Values in parentheses represent the duration of lockdown in the respective countries. Percent change was calculated relative to a baseline scenario of disease spread with no intervention.

Figure 5. Projected total infections over time when parameters are normalized for the age distribution of the population in each country and the fraction of the under 70-year-old population with HIV/AIDS and or TB. Areas shaded in grey denote lockdown duration.

1  
2  
3  
4  
5  
6  
7  
8  
9  
10  
11  
12  
13  
14  
15  
16  
17  
18  
19  
20  
21  
22  
23  
24  
25  
26  
27  
28  
29  
30  
31  
32  
33  
34  
35  
36  
37  
38  
39  
40  
41  
42  
43  
44  
45  
46  
47  
48  
49  
50  
51  
52  
53  
54  
55  
56  
57  
58  
59  
60

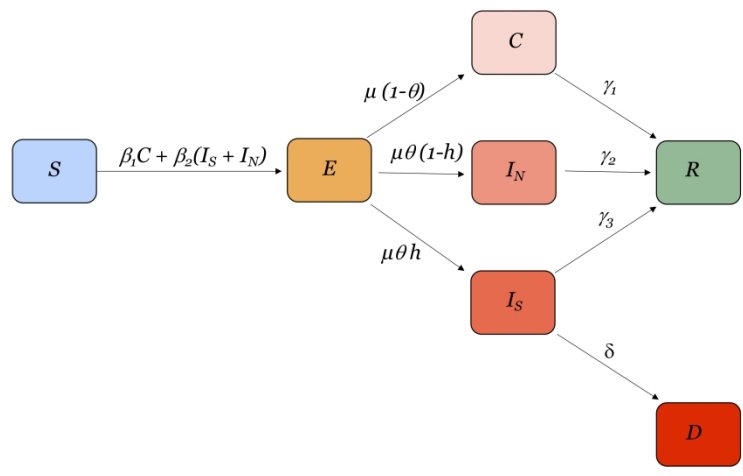

Figure 1. Modified SEIR model structure. Susceptible individuals, S, become exposed, E, to SARS-CoV-2. A proportion of these individuals become symptomatically infected with severe symptoms, IS, or non-severe, symptoms, IN, while the rest become contagious with mild or no symptoms, C. Asymptomatic or mildly symptomatic, moderately symptomatic and severely symptomatic individuals recover, R, and severely infected individuals may also die, D.

338x190mm (300 x 300 DPI)

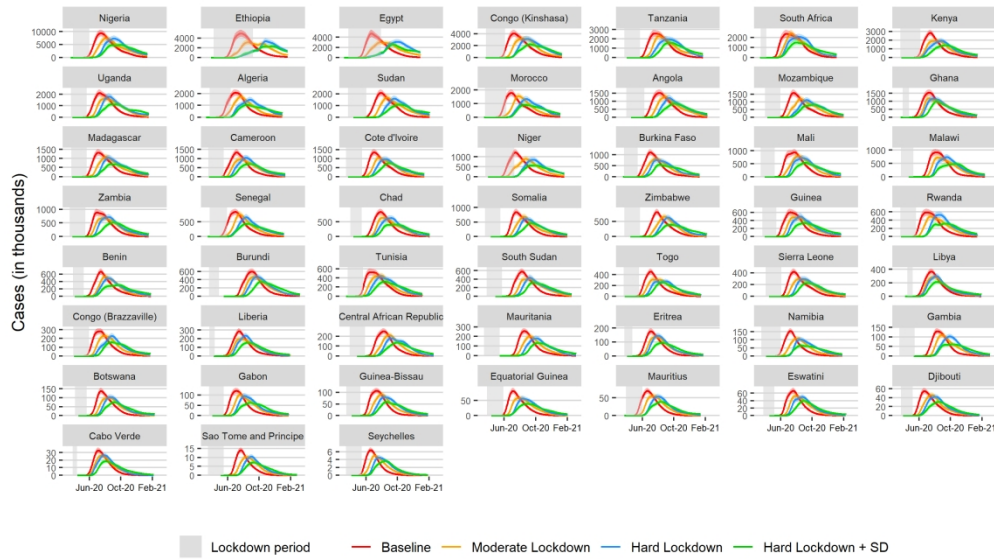

Figure 2. Projected total infections over time when parameters are normalized for the age distribution of the population in each country. Areas shaded in grey denote lockdown duration. SD denotes 'social distancing.'

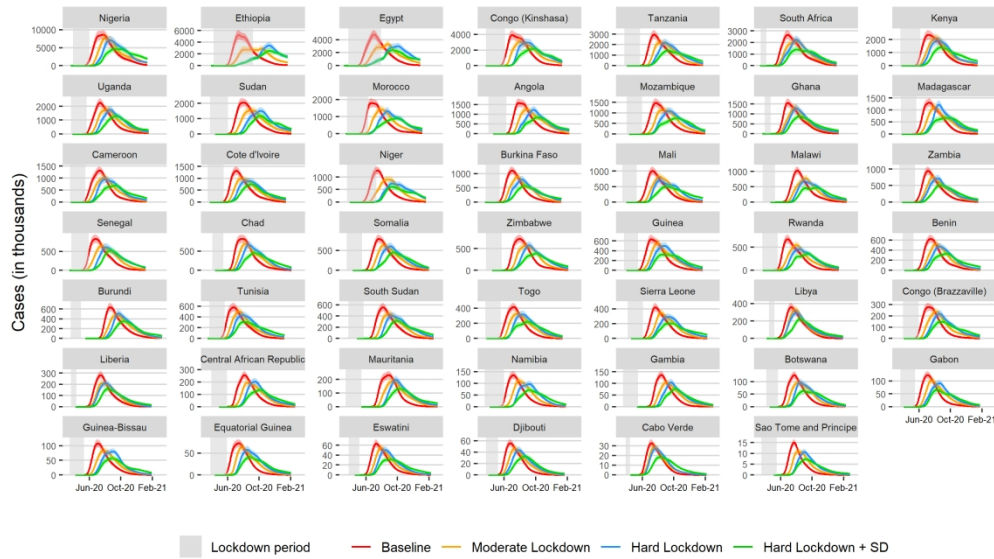

Figure 3. Percent change in peak severe infections under moderate lockdown scenario, parameters adjusted by age only.

1  
2  
3  
4  
5  
6  
7  
8  
9  
10  
11  
12  
13  
14  
15  
16  
17  
18  
19  
20  
21  
22  
23  
24  
25  
26  
27  
28  
29  
30  
31  
32  
33  
34  
35  
36  
37  
38  
39  
40  
41  
42  
43  
44  
45  
46  
47  
48  
49  
50  
51  
52  
53  
54  
55  
56  
57  
58  
59  
60



Figure 4. Percent change in peak total infections under interventions, compared to baseline, parameters adjusted by age only. Values in parentheses represent the duration of lockdown in the respective countries. Percent change was calculated relative to a baseline scenario of disease spread with no intervention.

1  
2  
3  
4  
5  
6  
7  
8  
9  
10  
11  
12  
13  
14  
15  
16  
17  
18  
19  
20  
21  
22  
23  
24  
25  
26  
27  
28  
29  
30  
31  
32  
33  
34  
35  
36  
37  
38  
39  
40  
41  
42  
43  
44  
45  
46  
47  
48  
49  
50  
51  
52  
53  
54  
55  
56  
57  
58  
59  
60



Figure 5. Projected total infections over time when parameters are normalized for the age distribution of the population in each country and the fraction of the under 70-year-old population with HIV/AIDS and or TB. Areas shaded in grey denote lockdown duration.



### Supplementary Appendix Initial Cases, Lockdown dates and Sources

| Country                  | Date_20_plus | InitialCaseNo | start_lockdown | end_lockdown | lockdown_duration | source      |
|--------------------------|--------------|---------------|----------------|--------------|-------------------|-------------|
| Algeria                  | 3/9/20       | 20            | 3/23/20        | 6/13/20      | 82                | 1,2         |
| Angola                   | 4/18/20      | 24            | 3/31/20        | 6/9/20       | 70                | 3,4         |
| Benin                    | 4/5/20       | 22            | 3/30/20        | 5/10/20      | 41                | 5           |
| Botswana                 | 4/19/20      | 20            | 4/6/20         | 5/22/20      | 46                | 6           |
| Burkina Faso             | 3/18/20      | 20            | 3/21/20        | 5/14/20      | 54                | 7           |
| Burundi                  | 5/17/20      | 23            | 3/21/20        | 4/29/20      | 39                | 8,9         |
| Cabo Verde               | 4/15/20      | 56            | 3/28/20        | 4/14/20      | 17                | 10          |
| Cameroon                 | 3/20/20      | 20            | 3/18/20        | 5/1/20       | 44                | 11,12       |
| Central African Republic | 4/28/20      | 50            | 3/30/20        | NA           | 60                | 13          |
| Chad                     | 4/13/20      | 23            | 4/2/20         | 5/15/20      | 43                | 14          |
| Congo (Brazzaville)      | 4/2/20       | 22            | 3/31/20        | 5/31/20      | 61                | 15,16       |
| Congo (Kinshasa)         | 3/21/20      | 23            | 3/18/20        | 6/4/20       | 78                | 17,18,19,20 |
| Cote d'Ivoire            | 3/23/20      | 25            | 3/16/20        | 5/17/20      | 62                | 21,22       |
| Djibouti                 | 3/31/20      | 30            | 3/23/20        | 5/8/20       | 46                | 23          |
| Egypt                    | 3/8/20       | 49            | 3/15/20        | 7/30/20      | 137               | 24,25,26    |
| Equatorial Guinea        | 4/12/20      | 21            | 3/26/20        | 5/29/20      | 64                | 27,28       |
| Eritrea                  | 4/2/20       | 22            | 3/23/20        | 4/23/20      | 31                | 29          |
| Eswatini                 | 4/18/20      | 22            | 3/26/20        | 5/7/20       | 42                | 30          |
| Ethiopia                 | 3/29/20      | 21            | 3/22/20        | 9/8/20       | 170               | 31,32       |
| Gabon                    | 4/2/20       | 21            | 3/20/20        | 5/17/20      | 58                | 33          |
| Gambia                   | 5/11/20      | 22            | 3/17/20        | 5/15/20      | 59                | 34          |
| Ghana                    | 3/22/20      | 23            | 3/17/20        | 4/20/20      | 34                | 35,36       |
| Guinea                   | 3/30/20      | 22            | 3/26/20        | 5/15/20      | 50                | 37,38       |
| Guinea-Bissau            | 4/7/20       | 33            | 3/17/20        | 5/11/20      | 55                | 39          |
| Kenya                    | 3/24/20      | 25            | 3/15/20        | 4/27/20      | 43                | 40,41,42    |
| Liberia                  | 4/8/20       | 31            | 3/22/20        | 5/7/20       | 21                | 43,44       |
| Libya                    | 4/7/20       | 20            | 4/17/20        | 5/7/20       | 20                | 45          |
| Madagascar               | 3/26/20      | 23            | 3/23/20        | NA           | 60                | 46          |
| Malawi                   | 4/22/20      | 23            | 3/23/20        | 5/10/20      | 48                | 47,48       |
| Mali                     | 3/30/20      | 25            | 3/15/20        | 5/9/20       | 55                | 49          |
| Mauritania               | 5/14/20      | 20            | 3/15/20        | NA           | 60                | 50          |
| Mauritius                | 3/22/20      | 28            | 3/29/20        | 6/1/20       | 64                | 51          |
| Morocco                  | 3/15/20      | 28            | 3/15/20        | 6/10/20      | 87                | 52,53,54    |
| Mozambique               | 4/10/20      | 20            | 3/23/20        | 5/30/20      | 68                | 55,56,57    |
| Namibia                  | 5/23/20      | 20            | 3/17/20        | 6/1/20       | 76                | 58          |
| Niger                    | 3/30/20      | 27            | 3/20/20        | 7/11/20      | 113               | 59          |
| Nigeria                  | 3/21/20      | 22            | 3/30/20        | 6/1/20       | 63                | 60,61       |
| Rwanda                   | 3/23/20      | 36            | 3/21/20        | NA           | 60                | 62          |
| Sao Tome and Principe    | 5/5/20       | 174           | 3/17/20        | NA           | 60                | 63          |
| Senegal                  | 3/15/20      | 24            | 3/14/20        | 5/30/20      | 77                | 64,65       |
| Seychelles               | 4/6/20       | 11            | 3/16/20        | NA           | 60                | 66          |

1  
2  
3  
4  
5  
6  
7  
8  
9  
10  
11  
12  
13  
14  
15  
16  
17  
18  
19  
20  
21  
22  
23  
24  
25  
26  
27  
28  
29  
30  
31  
32  
33  
34  
35  
36  
37  
38  
39  
40  
41  
42  
43  
44  
45  
46  
47  
48  
49  
50  
51  
52  
53  
54  
55  
56  
57  
58  
59  
60

|              |         |    |                 |    |          |
|--------------|---------|----|-----------------|----|----------|
| Sierra Leone | 4/17/20 | 26 | 4/4/20          | 60 | 67       |
| Somalia      | 4/10/20 | 21 | 3/18/20 NA      | 60 | 68       |
| South Africa | 3/13/20 | 24 | 3/27/20 5/1/20  | 35 | 69,70    |
| South Sudan  | 4/28/20 | 34 | 3/25/20 NA      | 60 | 71       |
| Sudan        | 4/13/20 | 29 | 3/15/20 6/3/20  | 80 | 72,73,74 |
| Tanzania     | 4/1/20  | 20 | 3/23/20 NA      | 60 | 75,76,77 |
| Togo         | 3/24/20 | 20 | 3/20/20 NA      | 60 | 78       |
| Tunisia      | 3/16/20 | 20 | 3/12/20 5/4/20  | 53 | 79,80,81 |
| Uganda       | 3/27/20 | 23 | 3/18/20 5/4/20  | 47 | 82,12    |
| Zambia       | 3/27/20 | 22 | 3/17/20 4/24/20 | 38 | 83,12    |
| Zimbabwe     | 4/15/20 | 23 | 3/23/20 NA      | 60 | 84,12    |

## Sources

1. <https://www.africanews.com/2020/04/28/algeria-extends-lockdown-measures-until-may-14//>
2. <https://www.africanews.com/2020/05/29/algeria-extends-virus-lockdown-until-june-13//>
3. <https://www.imf.org/en/Topics/imf-and-covid19/Policy-Responses-to-COVID-19>
4. US Embassy update
5. <https://reliefweb.int/report/benin/benin-coronavirus-covid-19-situation-report-no-7>
6. <https://www.imf.org/en/Topics/imf-and-covid19/Policy-Responses-to-COVID-19>
7. <https://www.garda.com/crisis24/news-alerts/334916/burkina-faso-curfew-hours-modified-as-of-april-20-update-6>
8. <https://www.hrw.org/news/2020/03/31/burundi-any-covid-19-cover-will-put-lives-risk>
9. <https://bi.usembassy.gov/covid-19-information/>
10. <https://cv.usembassy.gov/covid-19-information/>
11. <https://home.kpmg/xx/en/home/insights/2020/04/cameroon-government-and-institution-measures-in-response-to-covid.html>
12. <https://preventepidemics.org/covid19/perc/>
13. <https://www.gov.uk/foreign-travel-advice/central-african-republic/coronavirus>
14. <https://www.imf.org/en/Topics/imf-and-covid19/Policy-Responses-to-COVID-19>
15. <https://www.imf.org/en/Topics/imf-and-covid19/Policy-Responses-to-COVID-19>
16. U.S. Embassy Kinshasa, Democratic Republic of the Congo (May 12, 2020)
17. <https://africanbusinessmagazine.com/sectors/health-sectors/covid-19/fighting-covid-19-in-the-democratic-republic-of-congo/>
18. US Embassy update
19. <https://preventepidemics.org/covid19/perc/>
20. <https://www.aa.com.tr/en/africa/dr-congo-extends-state-of-emergency-amid-covid-19/1816681>
21. <https://preventepidemics.org/covid19/perc/>
22. <https://ci.usembassy.gov/covid-19-information/>
23. <https://www.aa.com.tr/en/africa/egypt-extends-state-of-emergency-for-3-months/1821088>
24. <https://dj.usembassy.gov/health-alert-u-s-embassy-djibouti-3/>
25. <https://preventepidemics.org/covid19/perc/>
26. <https://eg.usembassy.gov/health-alert-u-s-embassy-cairo-march-24-2020/>
27. <https://www.guineaecuatorialpress.com/noticia.php?id=15516>
28. <https://home.kpmg/xx/en/home/insights/2020/04/equatorial-guinea-government-and-institution-measures-in-response-to-covid.html>
29. <https://er.usembassy.gov/health-alert/>
30. <https://www.garda.com/crisis24/news-alerts/332881/eswatini-government-extends-partial-lockdown-until-may-7-due-to-covid-19-update-2>
31. <https://www.aljazeera.com/news/2020/04/ethiopia-declares-state-emergency-fight-covid-19-200408142519485.html>
32. <https://preventepidemics.org/covid19/perc/>
33. <https://ga.usembassy.gov/u-s-citizen-services/coronavirus-update/>
34. <https://www.garda.com/crisis24/news-alerts/324046/gambia-authorities-confirm-first-case-of-covid-19-march-17>
35. <https://www.imf.org/en/Topics/imf-and-covid19/Policy-Responses-to-COVID-19>
36. <https://preventepidemics.org/covid19/perc/>
37. <https://gn.usembassy.gov/u-s-citizen-services/covid-19-information/>
38. <https://preventepidemics.org/covid19/perc/>
39. <https://www.imf.org/en/Topics/imf-and-covid19/Policy-Responses-to-COVID-19>
40. [https://en.wikipedia.org/wiki/COVID-19\\_pandemic\\_in\\_Kenya#cite\\_note-37](https://en.wikipedia.org/wiki/COVID-19_pandemic_in_Kenya#cite_note-37)
41. US Embassy update
42. <https://www.guineaecuatorialpress.com/noticia.php?id=15516>
43. [https://en.wikipedia.org/wiki/COVID-19\\_pandemic\\_in\\_Liberia](https://en.wikipedia.org/wiki/COVID-19_pandemic_in_Liberia)
44. <https://preventepidemics.org/covid19/perc/>

- 1
- 2
- 3
45. <https://www.libyaobserver.ly/news/pc-extends-curfew-reduces-restricted-hours>
46. <https://mg.usembassy.gov/u-s-citizen-services/security-and-travel-information/covid-19-information/>
47. <https://www.aljazeera.com/news/2020/04/malawi-workers-relieved-court-blocks-covid-19-lockdown-plan-200420092511551.html>
48. [https://en.wikipedia.org/wiki/COVID-19\\_pandemic\\_in\\_Malawi](https://en.wikipedia.org/wiki/COVID-19_pandemic_in_Malawi)
49. <https://www.imf.org/en/Topics/imf-and-covid19/Policy-Responses-to-COVID-19>
50. <https://reliefweb.int/report/mauritania/wfp-mauritania-country-brief-march-2020>
51. <https://www.imf.org/en/Topics/imf-and-covid19/Policy-Responses-to-COVID-19>
52. <https://www.middleeastmonitor.com/20200419-moroccos-government-extends-coronavirus-lockdown-to-may-20/>
53. US Embassy update
54. <https://preventepidemics.org/covid19/perc/>
55. <https://mz.usembassy.gov/covid-19-information-2/>
56. <https://preventepidemics.org/covid19/perc/>
57. <https://covid19.ins.gov.mz/wp-content/uploads/2020/05/Boletim-Diario-Covid-N48.pdf>
58. <https://www.garda.com/crisis24/news-alert-full-history/EYN7SZavvRSKXPbHT/namibia-government-closes-schools-and-suspends-flights-between-qatar-ethiopia-and-germany-march-15>
59. <https://ne.usembassy.gov/u-s-citizen-services/covid-19-information/>
60. <https://www.aljazeera.com/news/2020/04/nigeria-extends-coronavirus-lockdown-key-cities-weeks-200413185335045.html>
61. <https://preventepidemics.org/covid19/perc/>
62. <https://www.ktpress.rw/2020/04/11-more-days-rwanda-extends-covid-19-lockdown-to-april-30/>
63. <https://ga.usembassy.gov/u-s-citizen-services/coronavirus-update/>
64. <https://sn.usembassy.gov/covid-19-information/>
65. <https://preventepidemics.org/covid19/perc/>
66. <http://www.seychellesnewsagency.com/articles/12688/Seychelles+and+COVID-++measures+taken+by+the+island+nation+to+protect+its+people>
67. <https://www.imf.org/en/Topics/imf-and-covid19/Policy-Responses-to-COVID-19>
68. <https://www.osac.gov/Country/Somalia/Content/Detail/Report/6062d8e6-3dbb-4abd-8e14-183ac940cf81>
69. <https://blogs.loc.gov/law/2020/04/south-africa-government-measures-to-contain-the-spread-of-covid-19-and-mitigate-damages/>
70. <https://preventepidemics.org/covid19/perc/>
71. <https://www.osac.gov/Country/SouthSudan/Content/Detail/Report/10c44b03-fdf8-4249-856a-1848aca55939>
72. <https://www.cmi.no/news/2441-covid-19-and-the-challenges-of-social-distancing-in-khartoum>
73. US Embassy update
74. <https://preventepidemics.org/covid19/perc/>
75. <https://www.africanews.com/2020/04/05/coronavirus-tanzania-tighter-covid-19-vigilance/>
76. <https://www.dw.com/en/tanzania-under-fire-from-who-for-lackluster-response-to-covid-19-pandemic/a-53304699>
77. <https://preventepidemics.org/covid19/perc/>
78. [https://en.wikipedia.org/wiki/COVID-19\\_pandemic\\_in\\_Togo](https://en.wikipedia.org/wiki/COVID-19_pandemic_in_Togo)
79. <https://english.alarabiya.net/en/coronavirus/2020/04/20/Coronavirus-Tunisia-extends-lockdown-looks-to-gradually-ease-restrictions>
80. <https://preventepidemics.org/covid19/perc/>
81. <https://www.garda.com/crisis24/news-alerts/334106/tunisia-ongoing-covid-19-lockdown-extended-until-may-3-update-7>
82. <https://www.theeastafrican.co.ke/news/ea/Uganda-to-relax-Covid19-lockdown/4552908-5537526-xoh407/index.html>
83. [https://en.wikipedia.org/wiki/COVID-19\\_pandemic\\_in\\_Zambia](https://en.wikipedia.org/wiki/COVID-19_pandemic_in_Zambia)
84. [https://en.wikipedia.org/wiki/COVID-19\\_pandemic\\_in\\_Zimbabwe](https://en.wikipedia.org/wiki/COVID-19_pandemic_in_Zimbabwe)

**Supplementary Appendix Parameters by age only**

| CountryName              | hosp_rate   | hosp_rate_UB | hosp_rate_LB |
|--------------------------|-------------|--------------|--------------|
| Angola                   | 0.20575232  | 0.24180141   | 0.169683142  |
| Benin                    | 0.207539628 | 0.244104981  | 0.170945069  |
| Botswana                 | 0.209078609 | 0.246019337  | 0.17209894   |
| Burkina Faso             | 0.206022975 | 0.242120179  | 0.169903482  |
| Burundi                  | 0.205822653 | 0.241901247  | 0.169723863  |
| Cabo Verde               | 0.210261266 | 0.247813329  | 0.172671586  |
| Cameroon                 | 0.206608871 | 0.242891552  | 0.170301355  |
| Central African Republic | 0.206743817 | 0.243048818  | 0.170412838  |
| Congo (Brazzaville)      | 0.206606175 | 0.242928949  | 0.170259694  |
| Congo (Kinshasa)         | 0.207026747 | 0.243388486  | 0.170636906  |
| Cote d'Ivoire            | 0.206839964 | 0.243193023  | 0.170460991  |
| Djibouti                 | 0.209763985 | 0.246986986  | 0.172500846  |
| Egypt                    | 0.210968491 | 0.248536556  | 0.173354066  |
| Eritrea                  | 0.208725001 | 0.245625144  | 0.1717894    |
| Equatorial Guinea        | 0.206163714 | 0.242329163  | 0.169976012  |
| Eswatini                 | 0.20868778  | 0.245499907  | 0.171838277  |
| Ethiopia                 | 0.208066795 | 0.244836777  | 0.171266347  |
| Gambia                   | 0.206386242 | 0.242613311  | 0.170135712  |
| Ghana                    | 0.207187505 | 0.243633541  | 0.17071358   |
| Greece                   | 0.243184847 | 0.292094165  | 0.194120367  |
| Guinea                   | 0.206936577 | 0.243307671  | 0.170538807  |
| Guinea-Bissau            | 0.206697271 | 0.242966457  | 0.170401735  |
| Kenya                    | 0.205931114 | 0.242014768  | 0.169825994  |
| Liberia                  | 0.207544856 | 0.244114595  | 0.170945964  |
| Libya                    | 0.209669736 | 0.246937985  | 0.172363806  |
| Madagascar               | 0.207171292 | 0.243677881  | 0.170638676  |
| Malawi                   | 0.206432223 | 0.242646782  | 0.170193264  |
| Maldives                 | 0.208640744 | 0.245693829  | 0.171557465  |
| Mali                     | 0.20625116  | 0.242443117  | 0.170036536  |
| Mauritania               | 0.207348793 | 0.243860589  | 0.170808808  |
| Mauritius                | 0.221841386 | 0.262608797  | 0.180973756  |
| Morocco                  | 0.214135401 | 0.252667293  | 0.175542333  |
| Mozambique               | 0.206843839 | 0.243171506  | 0.170489514  |
| Namibia                  | 0.208227277 | 0.245006174  | 0.171416075  |
| Niger                    | 0.206347149 | 0.242538082  | 0.170132277  |
| Nigeria                  | 0.206589003 | 0.242839025  | 0.170313513  |
| Rwanda                   | 0.20698375  | 0.243382098  | 0.170558857  |
| Sao Tome and Principe    | 0.207038312 | 0.243492027  | 0.170558854  |
| Senegal                  | 0.207257688 | 0.243744438  | 0.170743248  |
| Seychelles               | 0.215189603 | 0.254053027  | 0.176260364  |
| Sierra Leone             | 0.207020638 | 0.243423407  | 0.170590965  |

1  
2  
3  
4  
5  
6  
7  
8  
9  
10  
11  
12  
13  
14  
15  
16  
17  
18  
19  
20  
21  
22  
23  
24  
25  
26  
27  
28  
29  
30  
31  
32  
33  
34  
35  
36  
37  
38  
39  
40  
41  
42  
43  
44  
45  
46  
47  
48  
49  
50  
51  
52  
53  
54  
55  
56  
57  
58  
59  
60

|              |             |             |             |
|--------------|-------------|-------------|-------------|
| Somalia      | 0.206882422 | 0.243256952 | 0.170482012 |
| South Africa | 0.210965888 | 0.248452757 | 0.173430478 |
| South Sudan  | 0.20783077  | 0.244501808 | 0.171129631 |
| Sudan        | 0.208176285 | 0.244963113 | 0.171358029 |
| Syria        | 0.209918855 | 0.247289083 | 0.172510496 |
| Tanzania     | 0.206351373 | 0.242540083 | 0.170138607 |
| Togo         | 0.206822132 | 0.243151327 | 0.170466602 |
| Tunisia      | 0.216796979 | 0.256314451 | 0.177210668 |
| Uganda       | 0.205235195 | 0.241112756 | 0.16933958  |
| Zambia       | 0.205508643 | 0.241465189 | 0.169532648 |
| Zimbabwe     | 0.206943313 | 0.243307754 | 0.170551927 |

### Supplementary Appendix Parameters by age and TB/HIV prevalence

| CountryName              | hosp_rate   | hosp_rate_UB | hosp_rate_LB |
|--------------------------|-------------|--------------|--------------|
| Angola                   | 0.208508855 | 0.245493069  | 0.170343906  |
| Benin                    | 0.209142326 | 0.246251377  | 0.171329249  |
| Botswana                 | 0.246200701 | 0.295734696  | 0.180997409  |
| Burkina Faso             | 0.207377495 | 0.243934205  | 0.170228172  |
| Burundi                  | 0.20844609  | 0.245414656  | 0.170352722  |
| Cabo Verde               | 0.212463238 | 0.250762297  | 0.173199417  |
| Cameroon                 | 0.211777752 | 0.249813921  | 0.171540378  |
| Central African Republic | 0.212172565 | 0.250319211  | 0.171714153  |
| Chad                     | 0.208560111 | 0.245552133  | 0.170567325  |
| Congo (Brazzaville)      | 0.211552775 | 0.24955363   | 0.171445435  |
| Congo (Kinshasa)         | 0.208584859 | 0.24547517   | 0.171010399  |
| Cote d'Ivoire            | 0.211986846 | 0.250085928  | 0.171694741  |
| Djibouti                 | 0.212563879 | 0.250736713  | 0.173172004  |
| Egypt                    | 0.211002928 | 0.248582675  | 0.173362321  |
| Equatorial Guinea        | 0.214111991 | 0.252973806  | 0.171881279  |
| Eritrea                  | 0.210295199 | 0.247728013  | 0.172165789  |
| Eswatini                 | 0.250773758 | 0.301863097  | 0.18192663   |
| Ethiopia                 | 0.209850712 | 0.247225869  | 0.171693967  |
| Gabon                    | 0.213603152 | 0.252206128  | 0.172647257  |
| Gambia                   | 0.209136276 | 0.246296264  | 0.170794917  |
| Ghana                    | 0.209958295 | 0.247344291  | 0.171377761  |
| Guinea                   | 0.209240862 | 0.246393659  | 0.171091163  |
| Guinea-Bissau            | 0.21152442  | 0.249431163  | 0.171558842  |
| Kenya                    | 0.214884247 | 0.254005155  | 0.171972133  |
| Liberia                  | 0.209466443 | 0.246688059  | 0.171406584  |
| Libya                    | 0.209739267 | 0.247031104  | 0.172380473  |
| Madagascar               | 0.207801636 | 0.244522062  | 0.170789774  |
| Malawi                   | 0.220815851 | 0.2619099    | 0.173641137  |
| Mali                     | 0.207835645 | 0.244565121  | 0.17041635   |
| Mauritania               | 0.207555803 | 0.244137825  | 0.17085843   |
| Morocco                  | 0.214338659 | 0.252939504  | 0.175591056  |
| Mozambique               | 0.223662407 | 0.265695591  | 0.174521063  |
| Namibia                  | 0.230228323 | 0.274470837  | 0.176689906  |
| Niger                    | 0.207013969 | 0.243431112  | 0.170292119  |
| Nigeria                  | 0.210851441 | 0.248547448  | 0.171335255  |
| Rwanda                   | 0.211348422 | 0.249227437  | 0.171605104  |
| Sao Tome and Principe    | 0.207239366 | 0.243761287  | 0.170607048  |
| Senegal                  | 0.208313481 | 0.245158397  | 0.17099633   |
| Sierra Leone             | 0.208967992 | 0.246031381  | 0.171057761  |
| Somalia                  | 0.207585301 | 0.244198275  | 0.170650497  |
| South Africa             | 0.239390705 | 0.286520386  | 0.180244139  |

1  
2  
3  
4  
5  
6  
7  
8  
9  
10  
11  
12  
13  
14  
15  
16  
17  
18  
19  
20  
21  
22  
23  
24  
25  
26  
27  
28  
29  
30  
31  
32  
33  
34  
35  
36  
37  
38  
39  
40  
41  
42  
43  
44  
45  
46  
47  
48  
49  
50  
51  
52  
53  
54  
55  
56  
57  
58  
59  
60

|             |             |             |             |
|-------------|-------------|-------------|-------------|
| South Sudan | 0.20980823  | 0.2471501   | 0.171603644 |
| Sudan       | 0.208749758 | 0.245731131 | 0.171495495 |
| Tanzania    | 0.212393073 | 0.250631364 | 0.171586852 |
| Togo        | 0.210343647 | 0.247867478 | 0.171310738 |
| Tunisia     | 0.216896765 | 0.256448089 | 0.177234587 |
| Uganda      | 0.213594749 | 0.252308197 | 0.171343433 |
| Zambia      | 0.221890247 | 0.263404074 | 0.173459452 |
| Zimbabwe    | 0.227944676 | 0.271433602 | 0.175586126 |

For peer review only



## Supplementary Materials

### *Estimation of Epidemiological Parameters*

Parameters are estimated from the literature and the sources for this are outlined in Table 1. The basic reproduction number,  $R_0$ , was gathered from a systematic review for which the average value was 3.1 and the range of values was 1.9 – 6.5.[1] The infection rate for symptomatic transmissions,  $\beta_1$  was calculated using the  $R_0$  of COVID-19 divided by the infectious period for mild/asymptomatic cases and moderate/severe cases, respectively, taken from.[2–4] The asymptomatic rate in Wanzhou District, China was 20.8%, [5] this gave a value of 0.792 for the asymptomatic rate, the upper bound of 0.815 (asymptomatic rate of 18.5%) is taken from the Diamond Princess cruise ship [6] and the lower bound of 0.568 is taken from the Italian town of Vo, [7] where the asymptomatic rate was 43.2%. The infection rate for symptomatic infection,  $\beta_1$ , was calculated using  $R_0$  and the infectious period assumed from other coronaviruses of 5 days [4]. The reduction in infection rate for asymptomatic patients,  $\alpha$ , was based a model fitted to data from Wuhan. [8] The clearance rate for asymptomatic infection,  $\gamma_1$ , is calculated as the inverse of the infectious period which has an upper bound of 3.48 days, according to data collected in China, [8] a lower bound of 19 days using data on the viral load in asymptomatic patients [5] and the main value is the central point between the two. The clearance rate for symptomatic non-severe and severe cases,  $\gamma_2$  and  $\gamma_3$ , is the inverse of the infectious period, which was estimated as 5 to 7 days [9,10] and 3 to 7 days [11] in the literature. The incubation rate,  $\mu$ , was the inverse of the incubation time which averaged 4.8 days, and ranged from 1 to 14 days [12,13]. The severe case fatality rate,  $\delta$ , ranges from 20.9 percent [14], in South Africa, to 28 percent in China [15]. The relative increase in progression to severe disease in those with HIV/AIDS and/or TB,  $\kappa$ , was assumed to be 2.14 (1.1-2.7) using estimates from South Africa. [14,16]

## Supplementary Figures

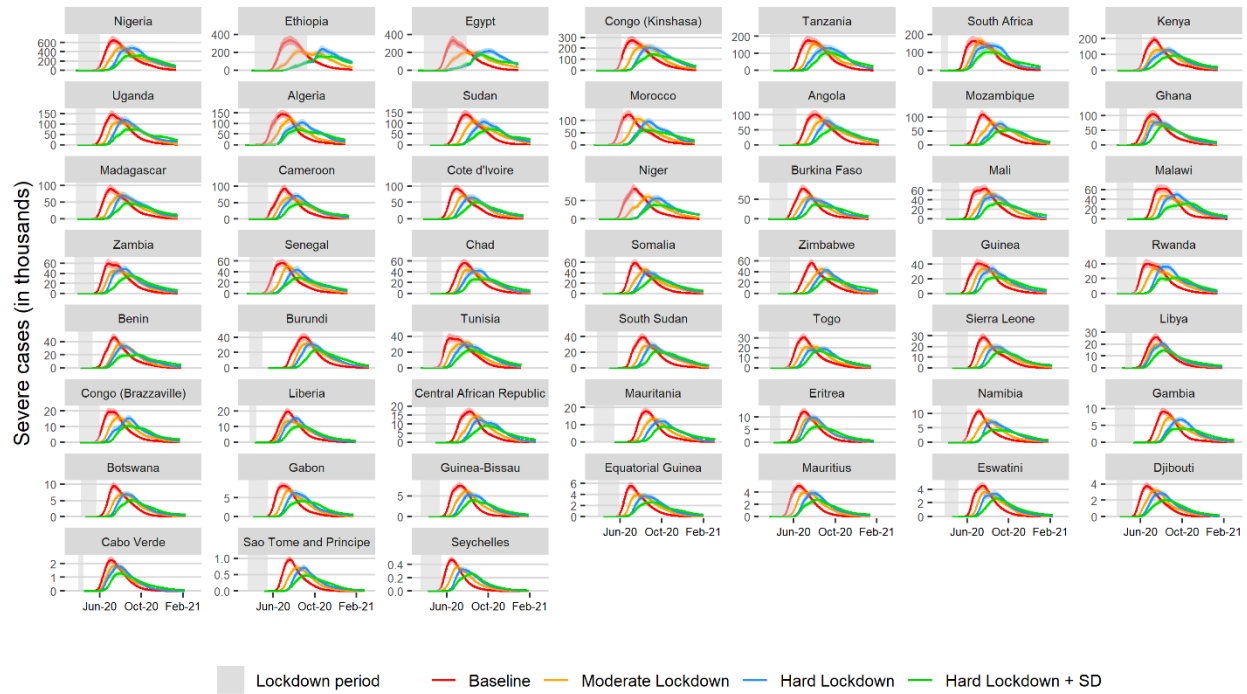

Figure S1 Projected severe infections over time when parameters are normalized for the age distribution of the population in each country. Areas shaded in grey denote lockdown duration.

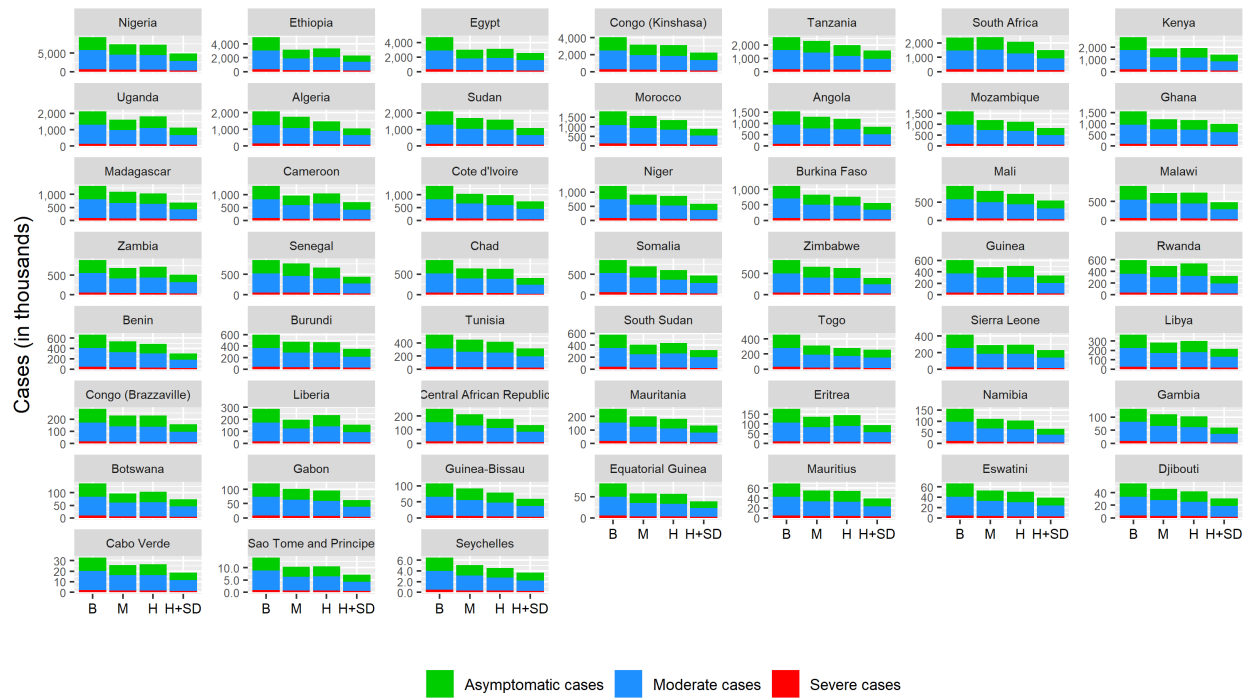

Figure S2. Projected peak infections and peak severe infections when parameters are normalized for the age distribution of the population in each country. Areas shaded in grey denote lockdown duration.

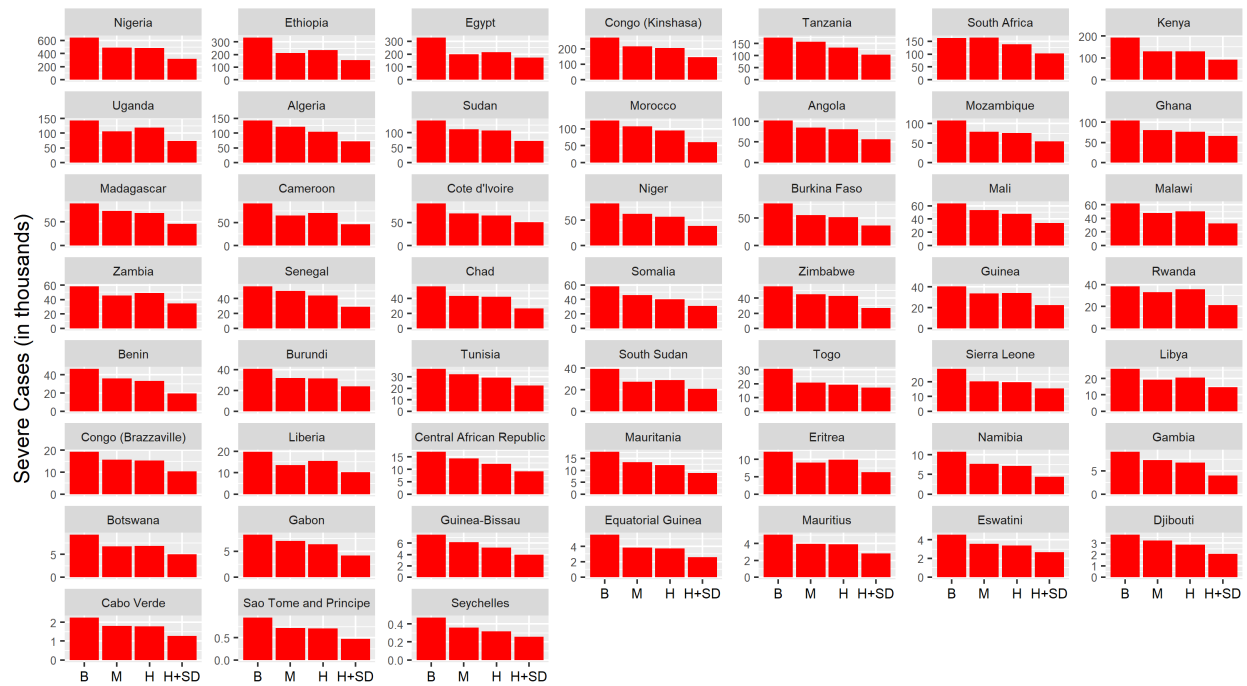

Figure S3. Projected peak severe infections and peak severe infections when parameters are normalized for the age distribution of the population in each country. Areas shaded in grey denote lockdown duration.

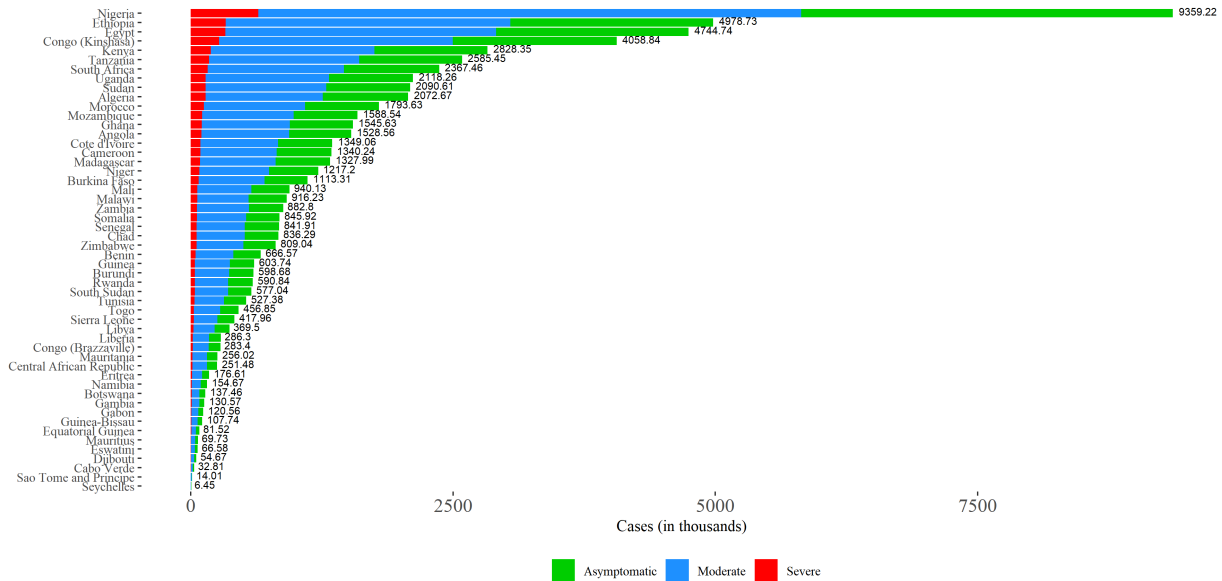

Figure S4. Peak number of infections by country under the baseline scenario, parameters adjusted by age only.

1  
2  
3  
4  
5  
6  
7  
8  
9  
10  
11  
12  
13  
14  
15  
16  
17  
18  
19  
20  
21  
22  
23  
24  
25  
26  
27  
28  
29  
30  
31  
32  
33  
34  
35  
36  
37  
38  
39  
40  
41  
42  
43  
44  
45  
46  
47  
48  
49  
50  
51  
52  
53  
54  
55  
56  
57  
58  
59  
60

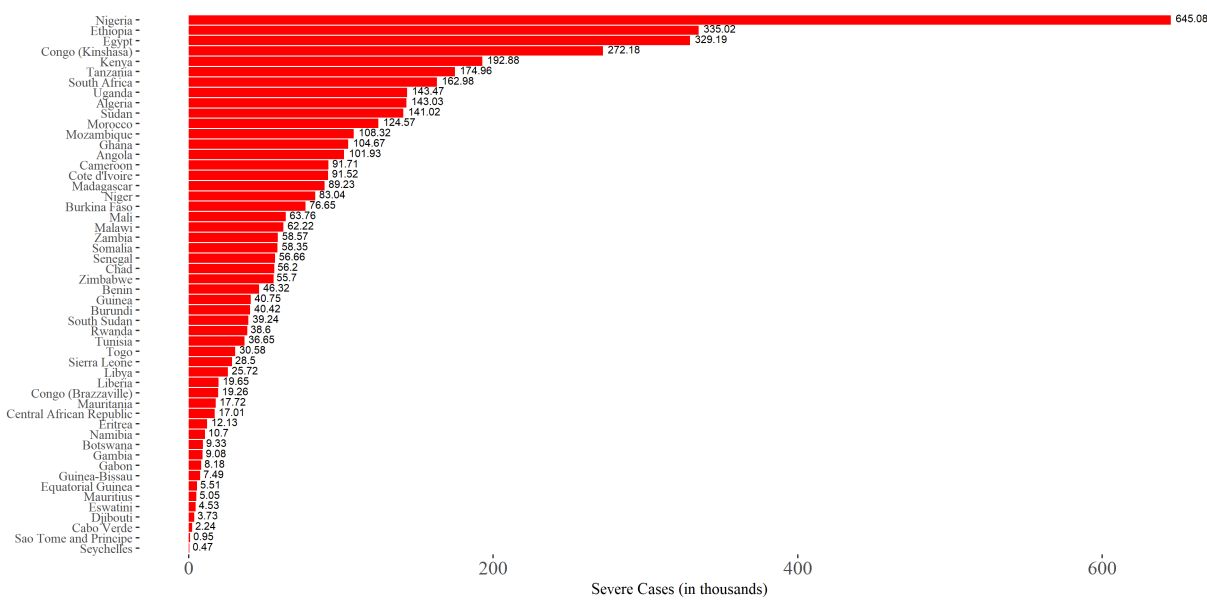

Figure S5. Peak number of severe infections by country under the baseline scenario, parameters adjusted by age only.

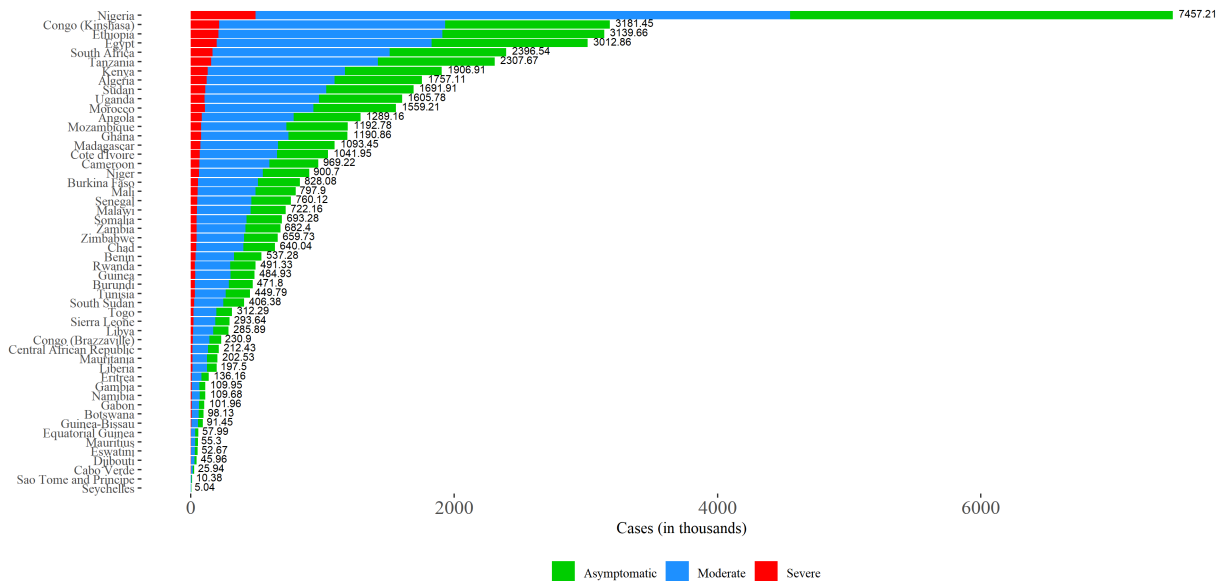

Figure S6. Peak number of infections by country with a moderate lockdown (Scenario 1), parameters adjusted by age only.

1  
2  
3  
4  
5  
6  
7  
8  
9  
10  
11  
12  
13  
14  
15  
16  
17  
18  
19  
20  
21  
22  
23  
24  
25  
26  
27  
28  
29  
30  
31  
32  
33  
34  
35  
36  
37  
38  
39  
40  
41  
42  
43  
44  
45  
46  
47  
48  
49  
50  
51  
52  
53  
54  
55  
56  
57  
58  
59  
60

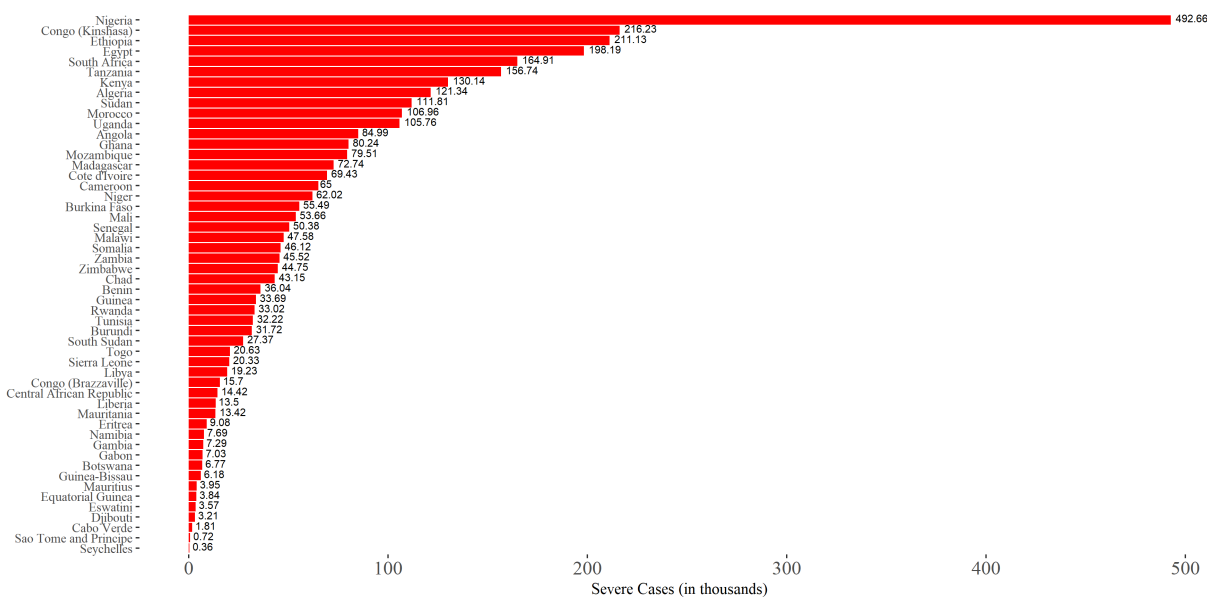

Figure S7. Peak number of severe infections by country with a moderate lockdown (Scenario 1), parameters adjusted by age only.



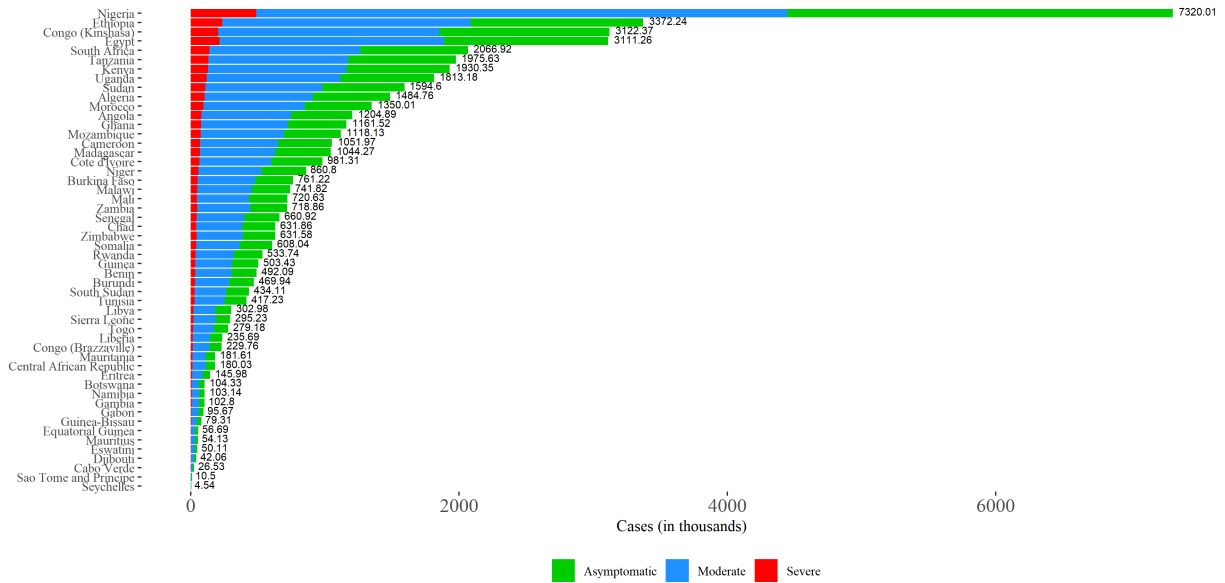

Figure S8. Peak number of infections by country with a hard lockdown (Scenario 2), parameters adjusted by age only.

1  
2  
3  
4  
5  
6  
7  
8  
9  
10  
11  
12  
13  
14  
15  
16  
17  
18  
19  
20  
21  
22  
23  
24  
25  
26  
27  
28  
29  
30  
31  
32  
33  
34  
35  
36  
37  
38  
39  
40  
41  
42  
43  
44  
45  
46  
47  
48  
49  
50  
51  
52  
53  
54  
55  
56  
57  
58  
59  
60

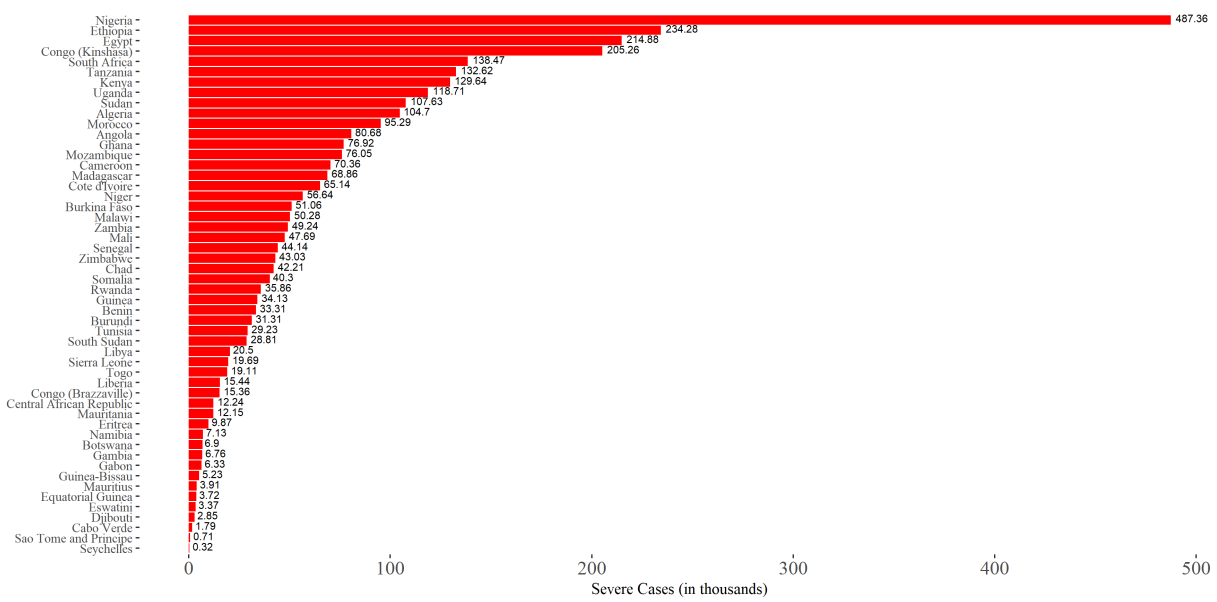

Figure S9. Peak number of severe infections by country with a hard lockdown (Scenario 2), parameters adjusted by age only.

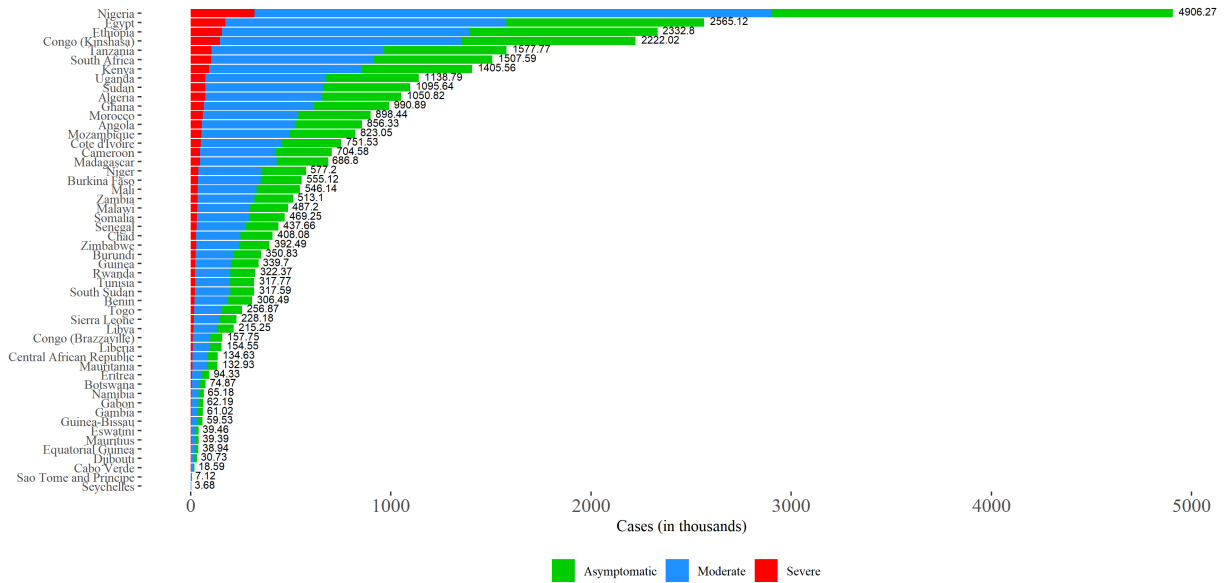

Figure S10. Peak number of infections by country with a hard lockdown followed by further measures such as social distancing (Scenario 3), parameters adjusted by age only.

1  
2  
3  
4  
5  
6  
7  
8  
9  
10  
11  
12  
13  
14  
15  
16  
17  
18  
19  
20  
21  
22  
23  
24  
25  
26  
27  
28  
29  
30  
31  
32  
33  
34  
35  
36  
37  
38  
39  
40  
41  
42  
43  
44  
45  
46  
47  
48  
49  
50  
51  
52  
53  
54  
55  
56  
57  
58  
59  
60

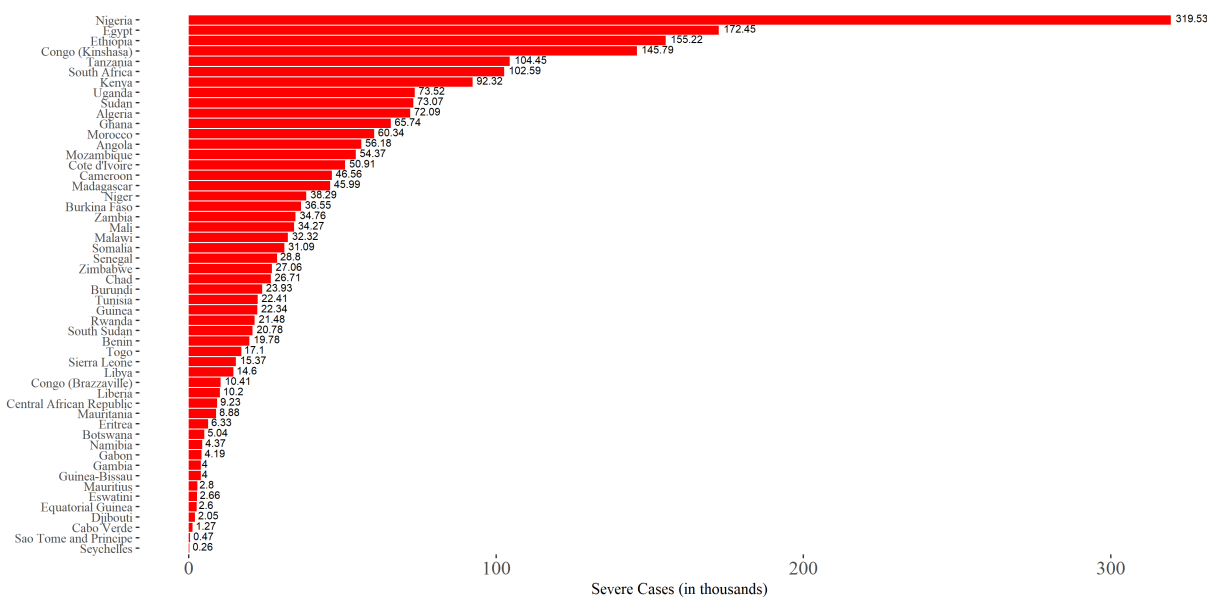

Figure S11. Peak number of severe infections by country with a hard lockdown followed by further measures such as social distancing (Scenario 3), parameters adjusted by age only.

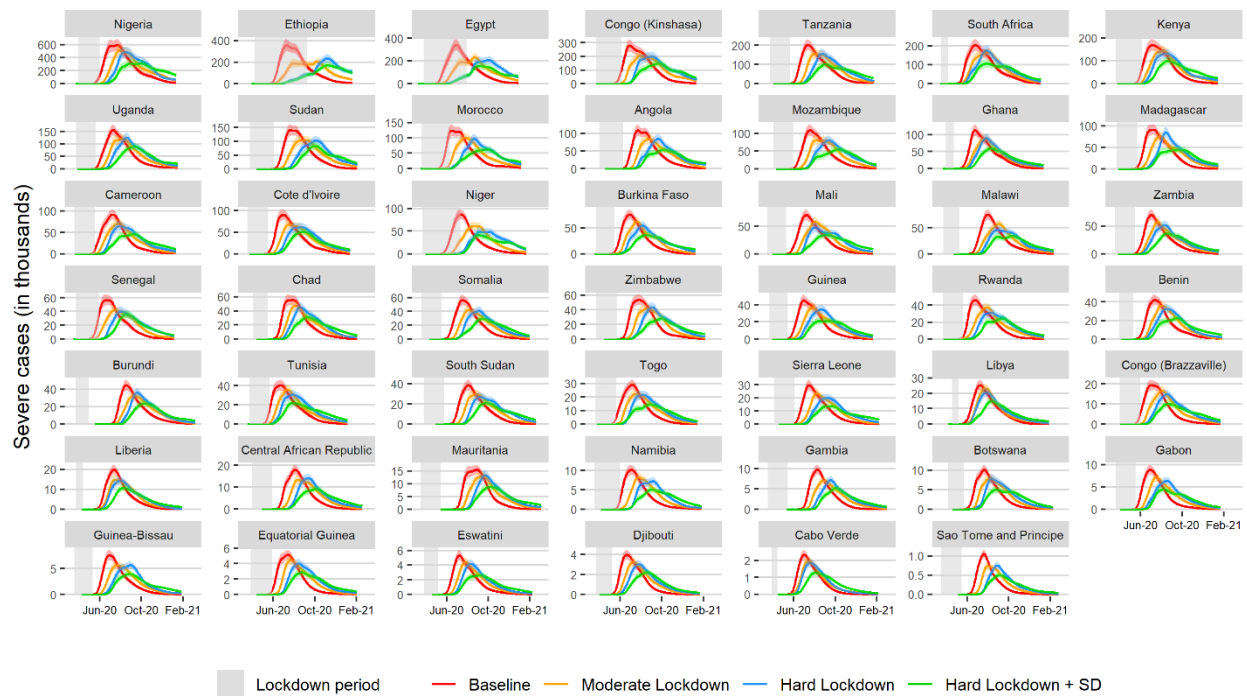

Figure S12. Projected severe infections over time when parameters are normalized for the age distribution of the population in each country and the fraction of the under 70-year-old population with HIV/AIDS and or TB. Areas shaded in grey denote lockdown duration.

1  
2  
3  
4  
5  
6  
7  
8  
9  
10  
11  
12  
13  
14  
15  
16  
17  
18  
19  
20  
21  
22  
23  
24  
25  
26  
27  
28  
29  
30  
31  
32  
33  
34  
35  
36  
37  
38  
39  
40  
41  
42  
43  
44  
45  
46  
47  
48  
49  
50  
51  
52  
53  
54  
55  
56  
57  
58  
59  
60

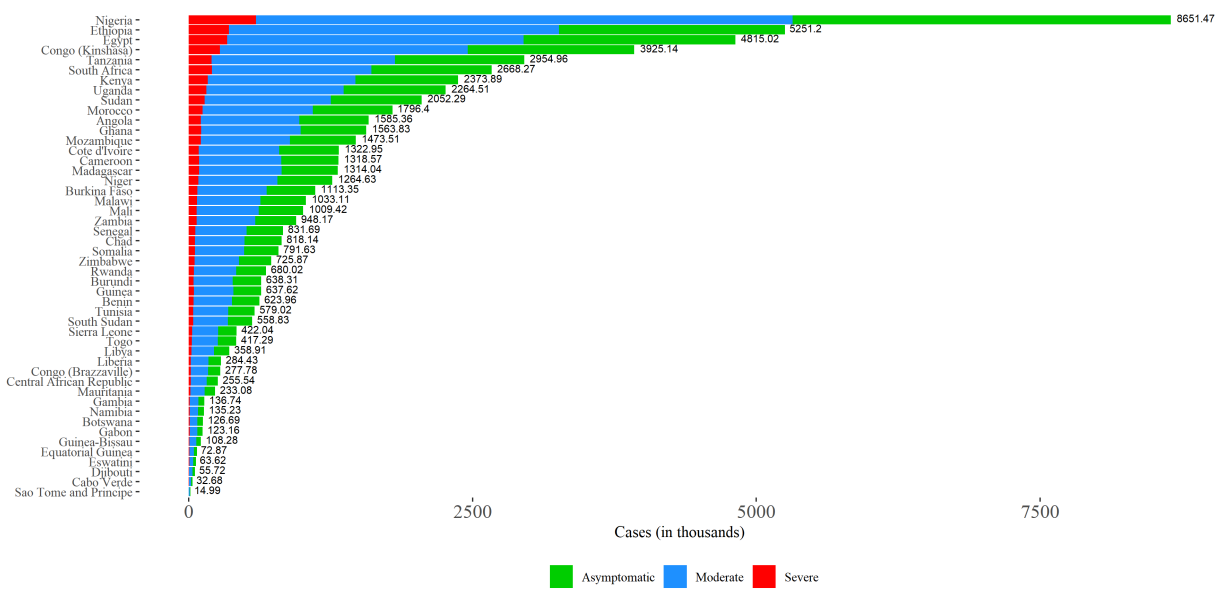

Figure S13. Peak number of infections by country under the baseline scenario, parameters adjusted by age and fraction of the under 70-year-old population with TB and/or HIV/AIDS.

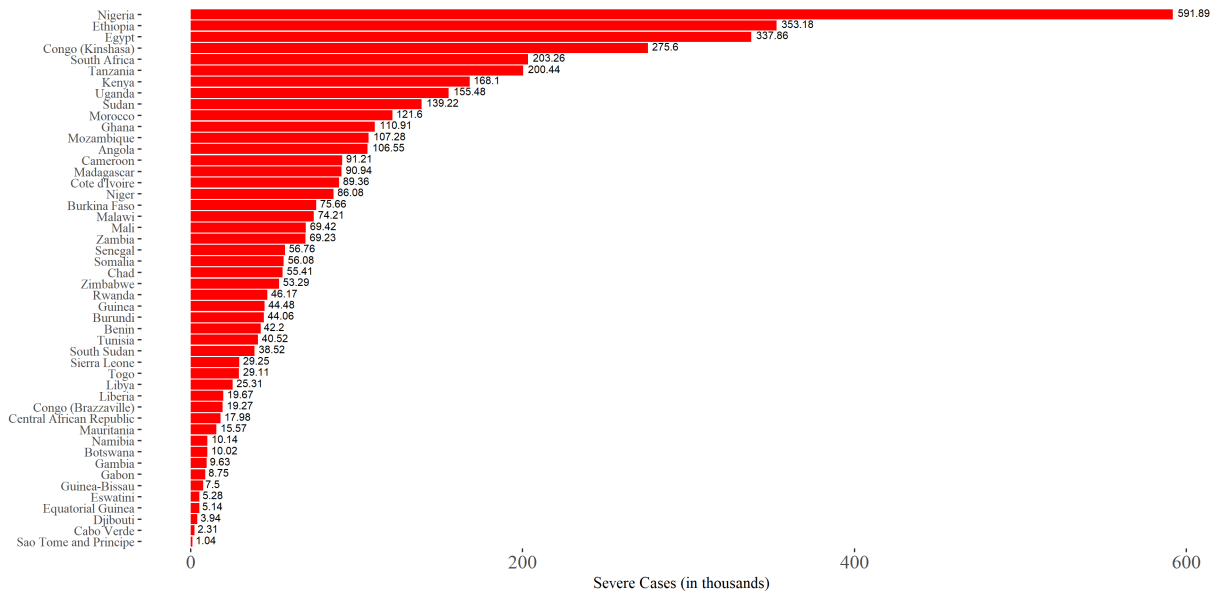

Figure S14. Peak number of severe infections by country under the baseline scenario, parameters adjusted by age and fraction of the under 70-year-old population with TB and/or HIV/AIDS.

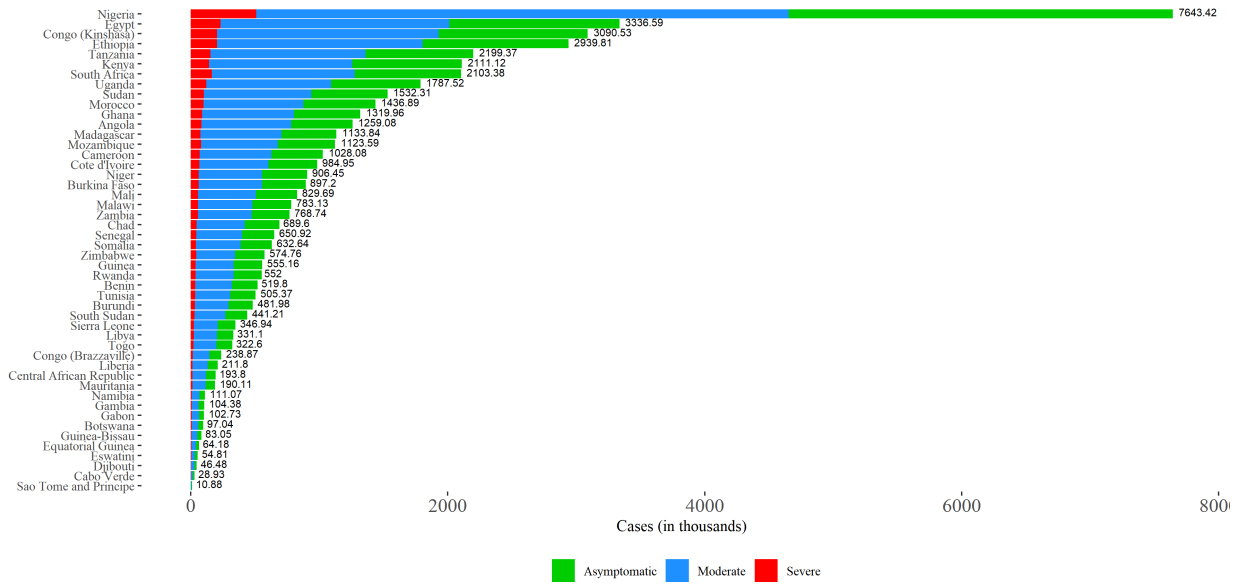

Figure S15. Peak number of infections by country with a moderate lockdown (Scenario 1), parameters adjusted by age and fraction of the under 70-year-old population with TB and/or HIV/AIDS.



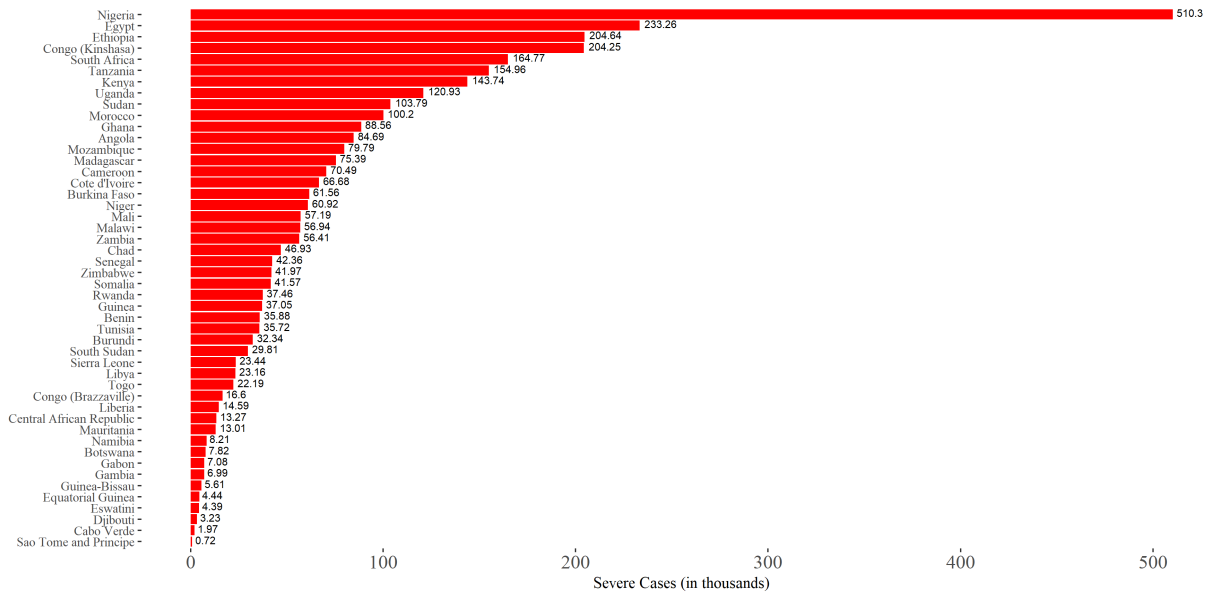

Figure S16. Peak number of severe infections by country with a moderate lockdown (Scenario 1), parameters adjusted by age and fraction of the under 70-year-old population with TB and/or HIV/AIDS.

1  
2  
3  
4  
5  
6  
7  
8  
9  
10  
11  
12  
13  
14  
15  
16  
17  
18  
19  
20  
21  
22  
23  
24  
25  
26  
27  
28  
29  
30  
31  
32  
33  
34  
35  
36  
37  
38  
39  
40  
41  
42  
43  
44  
45  
46  
47  
48  
49  
50  
51  
52  
53  
54  
55  
56  
57  
58  
59  
60

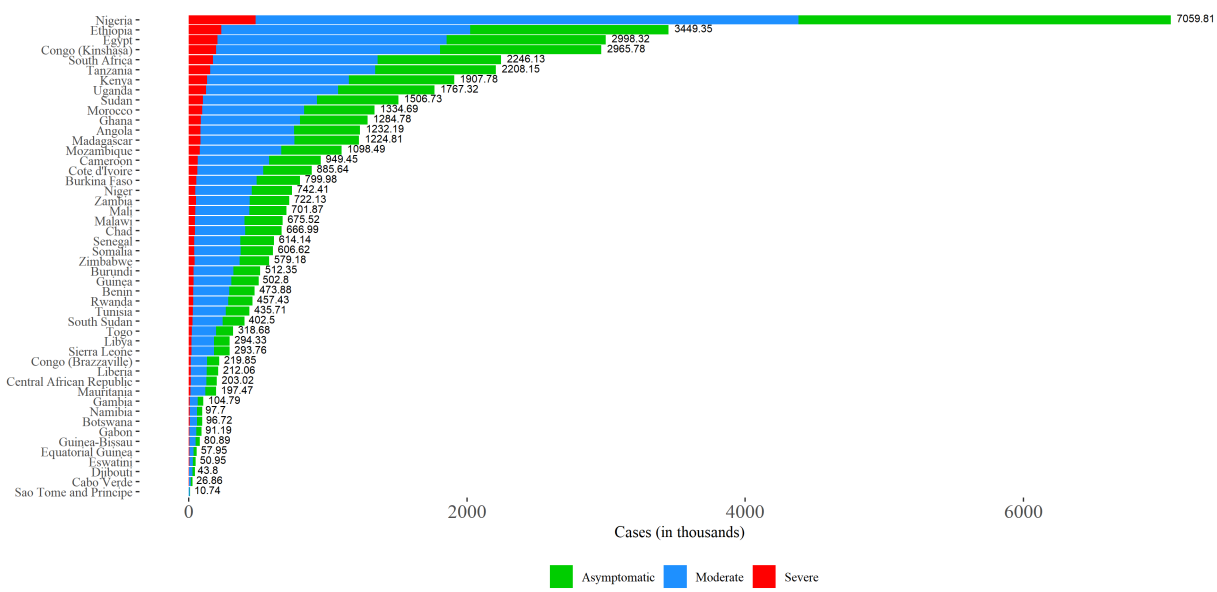

Figure S17. Peak number of infections by country with a hard lockdown (Scenario 2), parameters adjusted by age and fraction of the under 70-year-old population with TB and/or HIV/AIDS.

1  
2  
3  
4  
5  
6  
7  
8  
9  
10  
11  
12  
13  
14  
15  
16  
17  
18  
19  
20  
21  
22  
23  
24  
25  
26  
27  
28  
29  
30  
31  
32  
33  
34  
35  
36  
37  
38  
39  
40  
41  
42  
43  
44  
45  
46  
47  
48  
49  
50  
51  
52  
53  
54  
55  
56  
57  
58  
59  
60

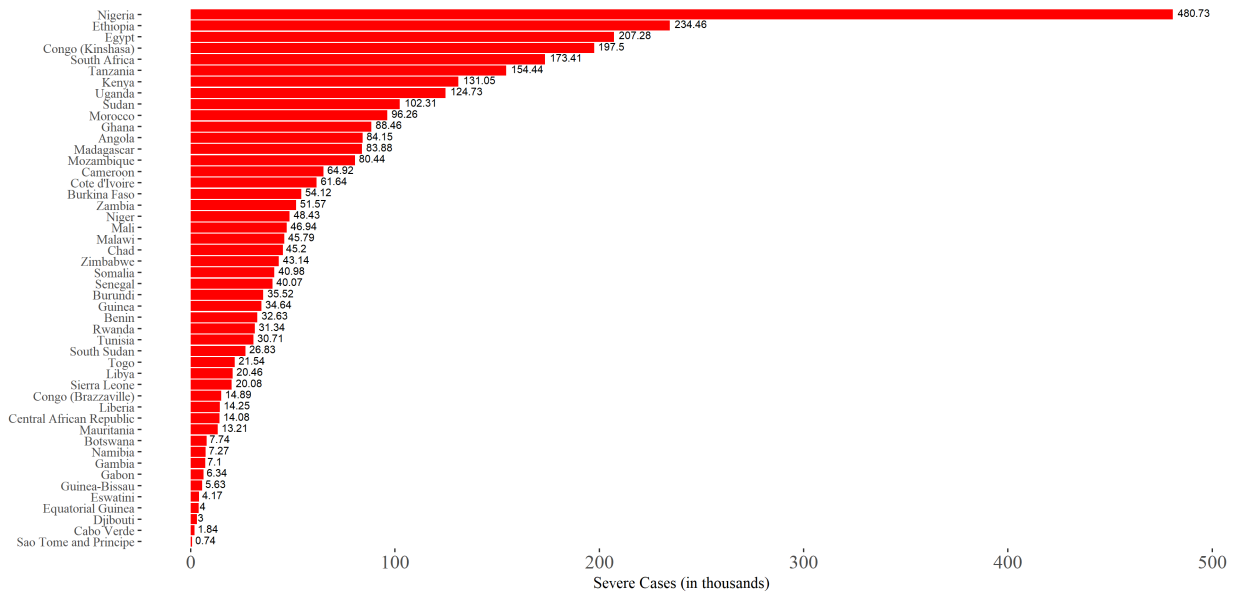

Figure S18. Peak number of severe infections by country with a hard lockdown (Scenario 2), parameters adjusted by age and fraction of the under 70-year-old population with TB and/or HIV/AIDS.

1  
2  
3  
4  
5  
6  
7  
8  
9  
10  
11  
12  
13  
14  
15  
16  
17  
18  
19  
20  
21  
22  
23  
24  
25  
26  
27  
28  
29  
30  
31  
32  
33  
34  
35  
36  
37  
38  
39  
40  
41  
42  
43  
44  
45  
46  
47  
48  
49  
50  
51  
52  
53  
54  
55  
56  
57  
58  
59  
60

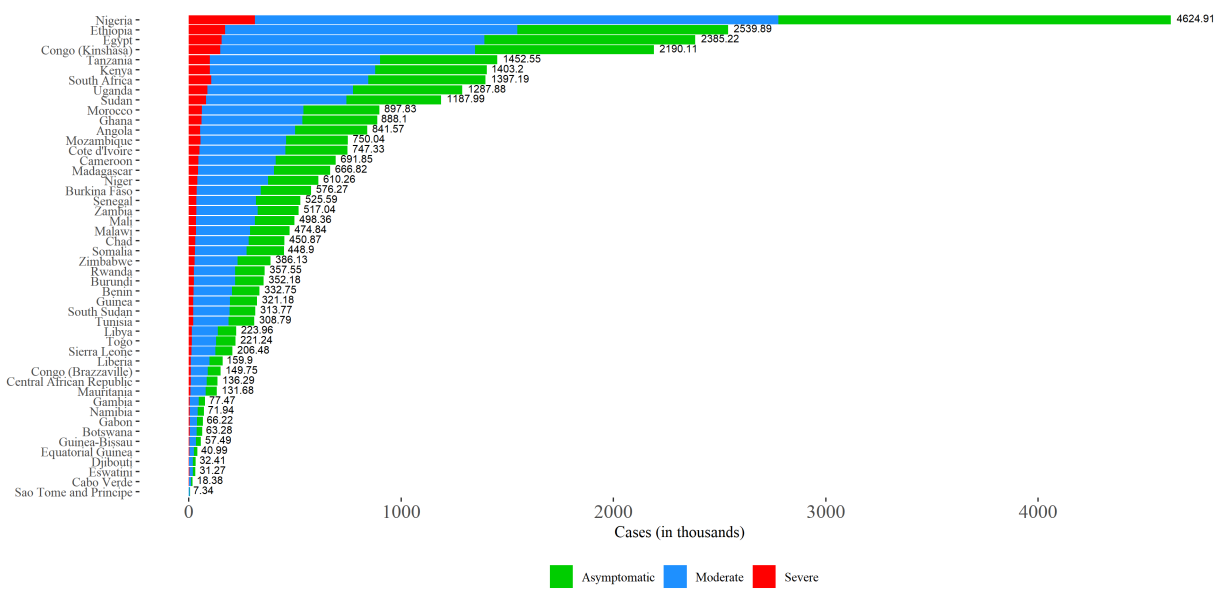

Figure S19. Peak number of infections by country with a hard lockdown followed by further measures such as social distancing (Scenario 3), parameters adjusted by age only.

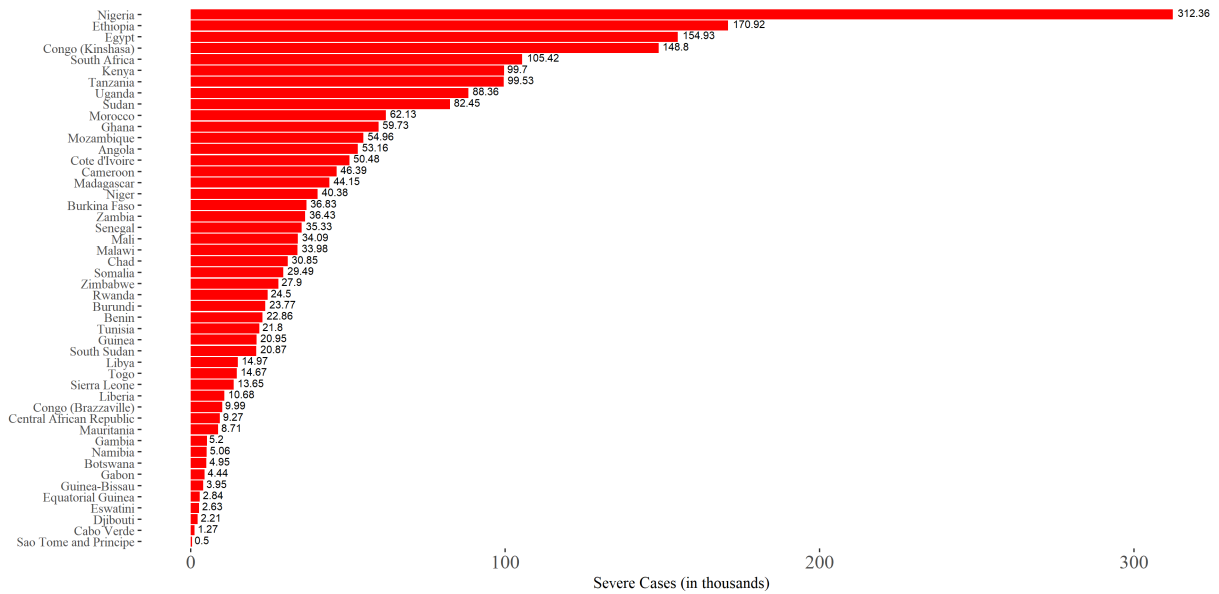

Figure S20. Peak number of severe infections by country with a hard lockdown followed by further measures such as social distancing (Scenario 3), parameters adjusted by age only.

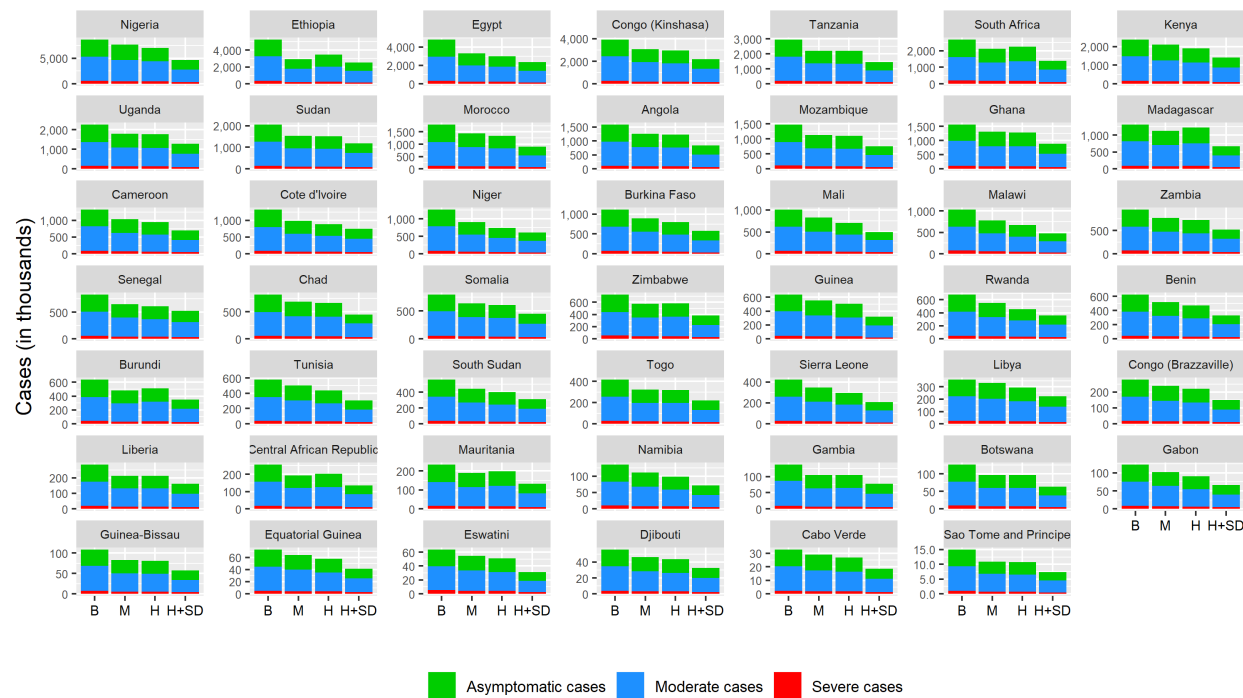

Figure S21. Projected peak infections and peak severe infections when parameters are normalized for the age distribution of the population in each country and the fraction of the under 70-year-old population with HIV/AIDS and or TB. Areas shaded in grey denote lockdown duration.

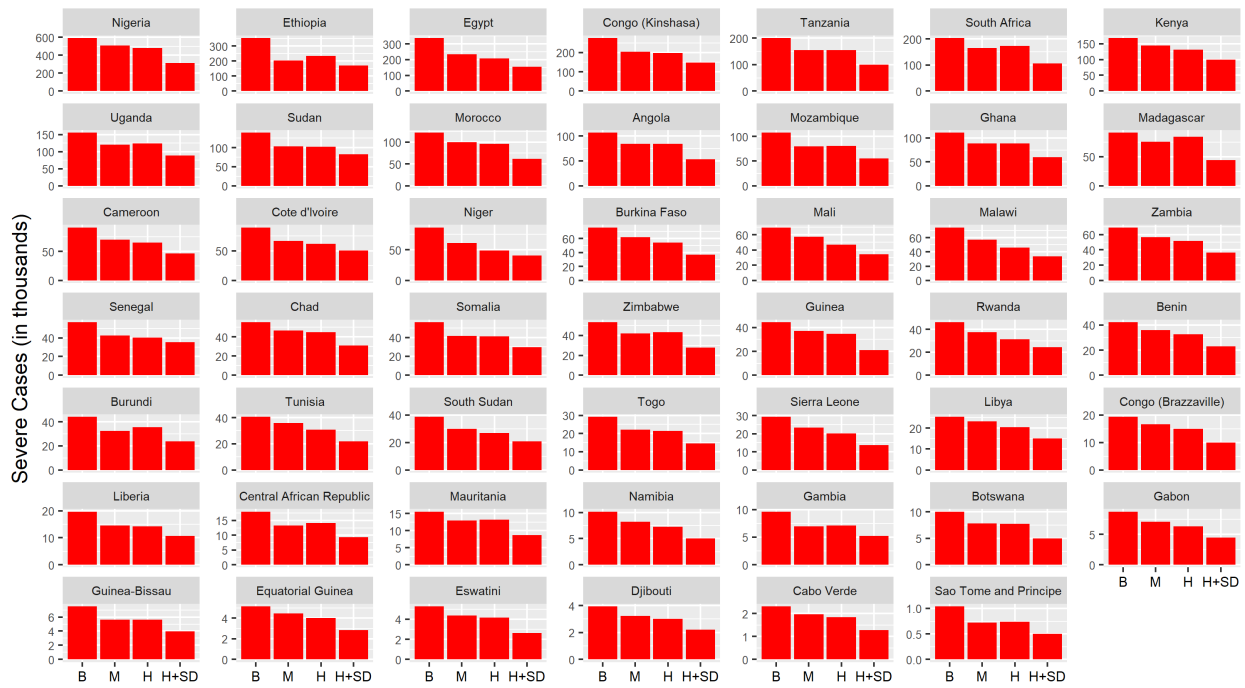

Figure S22. Projected peak severe infections and peak severe infections when parameters are normalized for the age distribution of the population in each country and the fraction of the under 70-year-old population with HIV/AIDS and or TB. Areas shaded in grey denote lockdown duration.

## References

- 1 Park M, Cook AR, Lim JT, *et al.* A Systematic Review of COVID-19 Epidemiology Based on Current Evidence. *J Clin Med* 2020;**9**:967. doi:10.3390/jcm9040967
- 2 Bi Q, Wu Y, Mei S, *et al.* Epidemiology and transmission of COVID-19 in 391 cases and 1286 of their close contacts in Shenzhen, China: a retrospective cohort study. *Lancet Infect Dis* 2020;**3099**:1–9. doi:10.1016/S1473-3099(20)30287-5
- 3 Wu JT, Leung K, Leung GM. Nowcasting and forecasting the potential domestic and international spread of the 2019-nCoV outbreak originating in Wuhan, China: a modelling study. *Lancet* 2020;**395**:689–97. doi:10.1016/S0140-6736(20)30260-9
- 4 Kissler SM, Tedijanto C, Goldstein E, *et al.* Projecting the transmission dynamics of SARS-CoV-2 through the postpandemic period. *Science (80- )* 2020;**368**:860–8. doi:10.1126/science.abb5793
- 5 Long QX, Tang XJ, Shi QL, *et al.* Clinical and immunological assessment of asymptomatic SARS-CoV-2 infections. *Nat Med* Published Online First: 2020. doi:10.1038/s41591-020-0965-6
- 6 Mizumoto K, Kagaya K, Zarebski A, *et al.* Estimating the asymptomatic proportion of coronavirus disease 2019 (COVID-19) cases on board the Diamond Princess cruise ship, Yokohama, Japan, 2020. *Eurosurveillance* 2020;**25**:1–5. doi:10.2807/1560-7917.ES.2020.25.10.2000180
- 7 Lavezzo E, Franchin E, Ciavarella C, *et al.* Suppression of COVID-19 outbreak in the municipality of Vo, Italy. *medRxiv* 2020;:2020.04.17.20053157. doi:10.1101/2020.04.17.20053157
- 8 Li R, Pei S, Chen B, *et al.* Substantial undocumented infection facilitates the rapid dissemination of novel coronavirus (SARS-CoV-2). *Science (80- )* 2020;**368**:489–93. doi:10.1126/science.abb3221
- 9 Prem K, Liu Y, Russell TW, *et al.* The effect of control strategies to reduce social mixing on outcomes of the COVID-19 epidemic in Wuhan, China: a modelling study. *Lancet Public Heal* 2020;**5**:e261–70. doi:10.1016/S2468-2667(20)30073-6
- 10 Woelfel R, Corman VM, Guggemos W, *et al.* Virological assessment of hospitalized cases of coronavirus disease 2019. *medRxiv* 2020;:2020.03.05.20030502. doi:10.1101/2020.03.05.20030502
- 11 Banerjee R, Bhattacharjee S, Varadwaj PK. Analyses and Forecast for COVID-19 epidemic in India. *medRxiv* 2020;:2020.06.26.20141077. doi:10.1101/2020.06.26.20141077
- 12 Lauer SA, Grantz KH, Bi Q, *et al.* The Incubation Period of Coronavirus Disease 2019 (COVID-19) From Publicly Reported Confirmed Cases: Estimation and Application. *Ann*



- 1  
2  
3 *Intern Med* 2020;**172**:577–82. doi:10.7326/M20-0504  
4  
5 13 Liu T, Hu J, Xiao J, *et al*. Time-varying transmission dynamics of Novel Coronavirus  
6 Pneumonia in China. *Systems Biology* 2020.  
7  
8 14 National Institute for Communicable Diseases. Covid-19 Sentinel Hospital Surveillance  
9 Update. 2020.  
10  
11 15 Weiss P, Murdoch DR. Clinical course and mortality risk of severe COVID-19. *Lancet*  
12 2020;**395**:1014–5. doi:10.1016/S0140-6736(20)30633-4  
13  
14  
15 16 Davies M-A. HIV and risk of COVID-19 death: a population cohort study from the  
16 Western Cape Province, South Africa. *medRxiv*;:1–21.  
17  
18  
19  
20  
21  
22  
23  
24  
25  
26  
27  
28  
29  
30  
31  
32  
33  
34  
35  
36  
37  
38  
39  
40  
41  
42  
43  
44  
45  
46  
47  
48  
49  
50  
51  
52  
53  
54  
55  
56  
57  
58  
59  
60
