# Supplementary material for: Modelling COVID-19 transmission in Africa: countrywise projections of total and severe infections under different lockdown scenarios
Source: PubMed Central journal article supplement — BMJ Open. 2021 Mar 8;11(3):e044149. doi: 10.1136/bmjopen-2020-044149 (PMC7941678; doi:10.1136/bmjopen-2020-044149), 2021-03-08
Supplement: bmjopen-2020-044149supp001.pdf [file bmjopen-2020-044149supp001.pdf]

**Supplementary Appendix Initial Cases, Lockdown dates and Sources**

| Country                  | Date_20_plus | InitialCaseNo | start_lockdown | end_lockdown | lockdown_duration | source      |
|--------------------------|--------------|---------------|----------------|--------------|-------------------|-------------|
| Algeria                  | 3/9/20       | 20            | 3/23/20        | 6/13/20      | 82                | 1,2         |
| Angola                   | 4/18/20      | 24            | 3/31/20        | 6/9/20       | 70                | 3,4         |
| Benin                    | 4/5/20       | 22            | 3/30/20        | 5/10/20      | 41                | 5           |
| Botswana                 | 4/19/20      | 20            | 4/6/20         | 5/22/20      | 46                | 6           |
| Burkina Faso             | 3/18/20      | 20            | 3/21/20        | 5/14/20      | 54                | 7           |
| Burundi                  | 5/17/20      | 23            | 3/21/20        | 4/29/20      | 39                | 8,9         |
| Cabo Verde               | 4/15/20      | 56            | 3/28/20        | 4/14/20      | 17                | 10          |
| Cameroon                 | 3/20/20      | 20            | 3/18/20        | 5/1/20       | 44                | 11,12       |
| Central African Republic | 4/28/20      | 50            | 3/30/20        | NA           | 60                | 13          |
| Chad                     | 4/13/20      | 23            | 4/2/20         | 5/15/20      | 43                | 14          |
| Congo (Brazzaville)      | 4/2/20       | 22            | 3/31/20        | 5/31/20      | 61                | 15,16       |
| Congo (Kinshasa)         | 3/21/20      | 23            | 3/18/20        | 6/4/20       | 78                | 17,18,19,20 |
| Cote d'Ivoire            | 3/23/20      | 25            | 3/16/20        | 5/17/20      | 62                | 21,22       |
| Djibouti                 | 3/31/20      | 30            | 3/23/20        | 5/8/20       | 46                | 23          |
| Egypt                    | 3/8/20       | 49            | 3/15/20        | 7/30/20      | 137               | 24,25,26    |
| Equatorial Guinea        | 4/12/20      | 21            | 3/26/20        | 5/29/20      | 64                | 27,28       |
| Eritrea                  | 4/2/20       | 22            | 3/23/20        | 4/23/20      | 31                | 29          |
| Eswatini                 | 4/18/20      | 22            | 3/26/20        | 5/7/20       | 42                | 30          |
| Ethiopia                 | 3/29/20      | 21            | 3/22/20        | 9/8/20       | 170               | 31,32       |
| Gabon                    | 4/2/20       | 21            | 3/20/20        | 5/17/20      | 58                | 33          |
| Gambia                   | 5/11/20      | 22            | 3/17/20        | 5/15/20      | 59                | 34          |
| Ghana                    | 3/22/20      | 23            | 3/17/20        | 4/20/20      | 34                | 35,36       |
| Guinea                   | 3/30/20      | 22            | 3/26/20        | 5/15/20      | 50                | 37,38       |
| Guinea-Bissau            | 4/7/20       | 33            | 3/17/20        | 5/11/20      | 55                | 39          |
| Kenya                    | 3/24/20      | 25            | 3/15/20        | 4/27/20      | 43                | 40,41,42    |
| Liberia                  | 4/8/20       | 31            | 3/22/20        | 5/7/20       | 21                | 43,44       |
| Libya                    | 4/7/20       | 20            | 4/17/20        | 5/7/20       | 20                | 45          |
| Madagascar               | 3/26/20      | 23            | 3/23/20        | NA           | 60                | 46          |
| Malawi                   | 4/22/20      | 23            | 3/23/20        | 5/10/20      | 48                | 47,48       |
| Mali                     | 3/30/20      | 25            | 3/15/20        | 5/9/20       | 55                | 49          |
| Mauritania               | 5/14/20      | 20            | 3/15/20        | NA           | 60                | 50          |
| Mauritius                | 3/22/20      | 28            | 3/29/20        | 6/1/20       | 64                | 51          |
| Morocco                  | 3/15/20      | 28            | 3/15/20        | 6/10/20      | 87                | 52,53,54    |
| Mozambique               | 4/10/20      | 20            | 3/23/20        | 5/30/20      | 68                | 55,56,57    |
| Namibia                  | 5/23/20      | 20            | 3/17/20        | 6/1/20       | 76                | 58          |
| Niger                    | 3/30/20      | 27            | 3/20/20        | 7/11/20      | 113               | 59          |
| Nigeria                  | 3/21/20      | 22            | 3/30/20        | 6/1/20       | 63                | 60,61       |
| Rwanda                   | 3/23/20      | 36            | 3/21/20        | NA           | 60                | 62          |
| Sao Tome and Principe    | 5/5/20       | 174           | 3/17/20        | NA           | 60                | 63          |
| Senegal                  | 3/15/20      | 24            | 3/14/20        | 5/30/20      | 77                | 64,65       |
| Seychelles               | 4/6/20       | 11            | 3/16/20        | NA           | 60                | 66          |

|              |         |    |         |         |    |          |
|--------------|---------|----|---------|---------|----|----------|
| Sierra Leone | 4/17/20 | 26 | 4/4/20  |         | 60 | 67       |
| Somalia      | 4/10/20 | 21 | 3/18/20 | NA      | 60 | 68       |
| South Africa | 3/13/20 | 24 | 3/27/20 | 5/1/20  | 35 | 69,70    |
| South Sudan  | 4/28/20 | 34 | 3/25/20 | NA      | 60 | 71       |
| Sudan        | 4/13/20 | 29 | 3/15/20 | 6/3/20  | 80 | 72,73,74 |
| Tanzania     | 4/1/20  | 20 | 3/23/20 | NA      | 60 | 75,76,77 |
| Togo         | 3/24/20 | 20 | 3/20/20 | NA      | 60 | 78       |
| Tunisia      | 3/16/20 | 20 | 3/12/20 | 5/4/20  | 53 | 79,80,81 |
| Uganda       | 3/27/20 | 23 | 3/18/20 | 5/4/20  | 47 | 82,12    |
| Zambia       | 3/27/20 | 22 | 3/17/20 | 4/24/20 | 38 | 83,12    |
| Zimbabwe     | 4/15/20 | 23 | 3/23/20 | NA      | 60 | 84,12    |

## Sources

1. <https://www.africanews.com/2020/04/28/algeria-extends-lockdown-measures-until-may-14//>
2. <https://www.africanews.com/2020/05/29/algeria-extends-virus-lockdown-until-june-13//>
3. <https://www.imf.org/en/Topics/imf-and-covid19/Policy-Responses-to-COVID-19>
4. US Embassy update
5. <https://reliefweb.int/report/benin/benin-coronavirus-covid-19-situation-report-no-7>
6. <https://www.imf.org/en/Topics/imf-and-covid19/Policy-Responses-to-COVID-19>
7. <https://www.garda.com/crisis24/news-alerts/334916/burkina-faso-curfew-hours-modified-as-of-april-20-update-6>
8. <https://www.hrw.org/news/2020/03/31/burundi-any-covid-19-cover-will-put-lives-risk>
9. <https://bi.usembassy.gov/covid-19-information/>
10. <https://cv.usembassy.gov/covid-19-information/>
11. <https://home.kpmg/xx/en/home/insights/2020/04/cameroon-government-and-institution-measures-in-response-to-covid.html>
12. <https://preventepidemics.org/covid19/perc/>
13. <https://www.gov.uk/foreign-travel-advice/central-african-republic/coronavirus>
14. <https://www.imf.org/en/Topics/imf-and-covid19/Policy-Responses-to-COVID-19>
15. <https://www.imf.org/en/Topics/imf-and-covid19/Policy-Responses-to-COVID-19>
16. U.S. Embassy Kinshasa, Democratic Republic of the Congo (May 12, 2020)
17. <https://africanbusinessmagazine.com/sectors/health-sectors/covid-19/fighting-covid-19-in-the-democratic-republic-of-congo/>
18. US Embassy update
19. <https://preventepidemics.org/covid19/perc/>
20. <https://www.aa.com.tr/en/africa/dr-congo-extends-state-of-emergency-amid-covid-19/1816681>
21. <https://preventepidemics.org/covid19/perc/>
22. <https://ci.usembassy.gov/covid-19-information/>
23. <https://www.aa.com.tr/en/africa/egypt-extends-state-of-emergency-for-3-months/1821088>
24. <https://dj.usembassy.gov/health-alert-u-s-embassy-djibouti-3/>
25. <https://preventepidemics.org/covid19/perc/>
26. <https://eg.usembassy.gov/health-alert-u-s-embassy-cairo-march-24-2020/>
27. <https://www.guineaecuatorialpress.com/noticia.php?id=15516>
28. <https://home.kpmg/xx/en/home/insights/2020/04/equatorial-guinea-government-and-institution-measures-in-response-to-covid.html>
29. <https://er.usembassy.gov/health-alert/>
30. <https://www.garda.com/crisis24/news-alerts/332881/eswatini-government-extends-partial-lockdown-until-may-7-due-to-covid-19-update-2>
31. <https://www.aljazeera.com/news/2020/04/ethiopia-declares-state-emergency-fight-covid-19-200408142519485.html>
32. <https://preventepidemics.org/covid19/perc/>
33. <https://ga.usembassy.gov/u-s-citizen-services/coronavirus-update/>
34. <https://www.garda.com/crisis24/news-alerts/324046/gambia-authorities-confirm-first-case-of-covid-19-march-17>
35. <https://www.imf.org/en/Topics/imf-and-covid19/Policy-Responses-to-COVID-19>
36. <https://preventepidemics.org/covid19/perc/>
37. <https://gn.usembassy.gov/u-s-citizen-services/covid-19-information/>
38. <https://preventepidemics.org/covid19/perc/>
39. <https://www.imf.org/en/Topics/imf-and-covid19/Policy-Responses-to-COVID-19>
40. [https://en.wikipedia.org/wiki/COVID-19\\_pandemic\\_in\\_Kenya#cite\\_note-37](https://en.wikipedia.org/wiki/COVID-19_pandemic_in_Kenya#cite_note-37)
41. US Embassy update
42. <https://www.guineaecuatorialpress.com/noticia.php?id=15516>
43. [https://en.wikipedia.org/wiki/COVID-19\\_pandemic\\_in\\_Liberia](https://en.wikipedia.org/wiki/COVID-19_pandemic_in_Liberia)
44. <https://preventepidemics.org/covid19/perc/>

45. <https://www.libyaobserver.ly/news/pc-extends-curfew-reduces-restricted-hours>
46. <https://mg.usembassy.gov/u-s-citizen-services/security-and-travel-information/covid-19-information/>
47. <https://www.aljazeera.com/news/2020/04/malawi-workers-relieved-court-blocks-covid-19-lockdown-plan-200420092511551.html>
48. [https://en.wikipedia.org/wiki/COVID-19\\_pandemic\\_in\\_Malawi](https://en.wikipedia.org/wiki/COVID-19_pandemic_in_Malawi)
49. <https://www.imf.org/en/Topics/imf-and-covid19/Policy-Responses-to-COVID-19>
50. <https://reliefweb.int/report/mauritania/wfp-mauritania-country-brief-march-2020>
51. <https://www.imf.org/en/Topics/imf-and-covid19/Policy-Responses-to-COVID-19>
52. <https://www.middleeastmonitor.com/20200419-moroccos-government-extends-coronavirus-lockdown-to-may-20/>
53. US Embassy update
54. <https://preventepidemics.org/covid19/perc/>
55. <https://mz.usembassy.gov/covid-19-information-2/>
56. <https://preventepidemics.org/covid19/perc/>
57. <https://covid19.ins.gov.mz/wp-content/uploads/2020/05/Boletim-Diario-Covid-N48.pdf>
58. <https://www.garda.com/crisis24/news-alert-full-history/EYN7SZavvRSKXPbT/namibia-government-closes-schools-and-suspends-flights-between-qatar-ethiopia-and-germany-march-15>
59. <https://ne.usembassy.gov/u-s-citizen-services/covid-19-information/>
60. <https://www.aljazeera.com/news/2020/04/nigeria-extends-coronavirus-lockdown-key-cities-weeks-200413185335045.html>
61. <https://preventepidemics.org/covid19/perc/>
62. <https://www.ktpress.rw/2020/04/11-more-days-rwanda-extends-covid-19-lockdown-to-april-30/>
63. <https://ga.usembassy.gov/u-s-citizen-services/coronavirus-update/>
64. <https://sn.usembassy.gov/covid-19-information/>
65. <https://preventepidemics.org/covid19/perc/>
66. <http://www.seychellesnewsagency.com/articles/12688/Seychelles+and+COVID-++measures+taken+by+the+island+nation+to+protect+its+people>
67. <https://www.imf.org/en/Topics/imf-and-covid19/Policy-Responses-to-COVID-19>
68. <https://www.osac.gov/Country/Somalia/Content/Detail/Report/6062d8e6-3dbb-4abd-8e14-183ac940cf81>
69. <https://blogs.loc.gov/law/2020/04/south-africa-government-measures-to-contain-the-spread-of-covid-19-and-mitigate-damages/>
70. <https://preventepidemics.org/covid19/perc/>
71. <https://www.osac.gov/Country/SouthSudan/Content/Detail/Report/10c44b03-fdf8-4249-856a-1848aca55939>
72. <https://www.cmi.no/news/2441-covid-19-and-the-challenges-of-social-distancing-in-khartoum>
73. US Embassy update
74. <https://preventepidemics.org/covid19/perc/>
75. <https://www.africanews.com/2020/04/05/coronavirus-tanzania-tighter-covid-19-vigilance//>
76. <https://www.dw.com/en/tanzania-under-fire-from-who-for-lackluster-response-to-covid-19-pandemic/a-53304699>
77. <https://preventepidemics.org/covid19/perc/>
78. [https://en.wikipedia.org/wiki/COVID-19\\_pandemic\\_in\\_Togo](https://en.wikipedia.org/wiki/COVID-19_pandemic_in_Togo)
79. <https://english.alarabiya.net/en/coronavirus/2020/04/20/Coronavirus-Tunisia-extends-lockdown-looks-to-gradually-ease-restrictions>
80. <https://preventepidemics.org/covid19/perc/>
81. <https://www.garda.com/crisis24/news-alerts/334106/tunisia-ongoing-covid-19-lockdown-extended-until-may-3-update-7>
82. <https://www.theeastafrican.co.ke/news/ea/Uganda-to-relax-Covid19-lockdown/4552908-5537526-xoh407/index.html>
83. [https://en.wikipedia.org/wiki/COVID-19\\_pandemic\\_in\\_Zambia](https://en.wikipedia.org/wiki/COVID-19_pandemic_in_Zambia)
84. [https://en.wikipedia.org/wiki/COVID-19\\_pandemic\\_in\\_Zimbabwe](https://en.wikipedia.org/wiki/COVID-19_pandemic_in_Zimbabwe)
