# Supplementary material for: Modelling COVID-19 transmission in Africa: countrywise projections of total and severe infections under different lockdown scenarios
Source: PubMed Central journal article supplement — BMJ Open. 2021 Mar 8;11(3):e044149. doi: 10.1136/bmjopen-2020-044149 (PMC7941678; doi:10.1136/bmjopen-2020-044149), 2021-03-08
Supplement: bmjopen-2020-044149supp003.pdf [file bmjopen-2020-044149supp003.pdf]

**Supplementary Appendix Parameters by age and TB/HIV prevalence**

| CountryName              | hosp_rate   | hosp_rate_UB | hosp_rate_LB |
|--------------------------|-------------|--------------|--------------|
| Angola                   | 0.208508855 | 0.245493069  | 0.170343906  |
| Benin                    | 0.209142326 | 0.246251377  | 0.171329249  |
| Botswana                 | 0.246200701 | 0.295734696  | 0.180997409  |
| Burkina Faso             | 0.207377495 | 0.243934205  | 0.170228172  |
| Burundi                  | 0.20844609  | 0.245414656  | 0.170352722  |
| Cabo Verde               | 0.212463238 | 0.250762297  | 0.173199417  |
| Cameroon                 | 0.211777752 | 0.249813921  | 0.171540378  |
| Central African Republic | 0.212172565 | 0.250319211  | 0.171714153  |
| Chad                     | 0.208560111 | 0.245552133  | 0.170567325  |
| Congo (Brazzaville)      | 0.211552775 | 0.24955363   | 0.171445435  |
| Congo (Kinshasa)         | 0.208584859 | 0.24547517   | 0.171010399  |
| Cote d'Ivoire            | 0.211986846 | 0.250085928  | 0.171694741  |
| Djibouti                 | 0.212563879 | 0.250736713  | 0.173172004  |
| Egypt                    | 0.211002928 | 0.248582675  | 0.173362321  |
| Equatorial Guinea        | 0.214111991 | 0.252973806  | 0.171881279  |
| Eritrea                  | 0.210295199 | 0.247728013  | 0.172165789  |
| Eswatini                 | 0.250773758 | 0.301863097  | 0.18192663   |
| Ethiopia                 | 0.209850712 | 0.247225869  | 0.171693967  |
| Gabon                    | 0.213603152 | 0.252206128  | 0.172647257  |
| Gambia                   | 0.209136276 | 0.246296264  | 0.170794917  |
| Ghana                    | 0.209958295 | 0.247344291  | 0.171377761  |
| Guinea                   | 0.209240862 | 0.246393659  | 0.171091163  |
| Guinea-Bissau            | 0.21152442  | 0.249431163  | 0.171558842  |
| Kenya                    | 0.214884247 | 0.254005155  | 0.171972133  |
| Liberia                  | 0.209466443 | 0.246688059  | 0.171406584  |
| Libya                    | 0.209739267 | 0.247031104  | 0.172380473  |
| Madagascar               | 0.207801636 | 0.244522062  | 0.170789774  |
| Malawi                   | 0.220815851 | 0.2619099    | 0.173641137  |
| Mali                     | 0.207835645 | 0.244565121  | 0.17041635   |
| Mauritania               | 0.207555803 | 0.244137825  | 0.17085843   |
| Morocco                  | 0.214338659 | 0.252939504  | 0.175591056  |
| Mozambique               | 0.223662407 | 0.265695591  | 0.174521063  |
| Namibia                  | 0.230228323 | 0.274470837  | 0.176689906  |
| Niger                    | 0.207013969 | 0.243431112  | 0.170292119  |
| Nigeria                  | 0.210851441 | 0.248547448  | 0.171335255  |
| Rwanda                   | 0.211348422 | 0.249227437  | 0.171605104  |
| Sao Tome and Principe    | 0.207239366 | 0.243761287  | 0.170607048  |
| Senegal                  | 0.208313481 | 0.245158397  | 0.17099633   |
| Sierra Leone             | 0.208967992 | 0.246031381  | 0.171057761  |
| Somalia                  | 0.207585301 | 0.244198275  | 0.170650497  |
| South Africa             | 0.239390705 | 0.286520386  | 0.180244139  |

---

|             |             |             |             |
|-------------|-------------|-------------|-------------|
| South Sudan | 0.20980823  | 0.2471501   | 0.171603644 |
| Sudan       | 0.208749758 | 0.245731131 | 0.171495495 |
| Tanzania    | 0.212393073 | 0.250631364 | 0.171586852 |
| Togo        | 0.210343647 | 0.247867478 | 0.171310738 |
| Tunisia     | 0.216896765 | 0.256448089 | 0.177234587 |
| Uganda      | 0.213594749 | 0.252308197 | 0.171343433 |
| Zambia      | 0.221890247 | 0.263404074 | 0.173459452 |
| Zimbabwe    | 0.227944676 | 0.271433602 | 0.175586126 |
